# Supplementary material for: Palladium-catalyzed three-component reaction of 2-alkynylbromobenzene, 2-alkynylaniline, and electrophile: an efficient pathway for the synthesis of diverse 11H-indeno[1,2-c]quinolines
Source: Royal Society of Chemistry journal article supplement (doi:10.1039/c2ob06764a), 2011-12-13

# **Palladium-catalyzed three-component reaction of 2-alkynylbromobenzene, 2-alkynylaniline, and electrophile: An efficient pathway for the synthesis of diverse 11*H*-indeno[1,2-*c*]quinolines**

**Xiaolin Pan,<sup>†</sup> Yong Luo,<sup>†</sup> and Jie Wu<sup>\*,†,‡</sup>**

<sup>†</sup> *Department of Chemistry, Fudan University, 220 Handan Road, Shanghai 200433, China.* <sup>‡</sup>

*Jiangxi Key Laboratory of Organic Chemistry, Jiangxi Science & Technology Normal University,*

*Nanchang 330013, China.*

jie\_wu@fudan.edu.cn

## **Supporting Information**

1. General experimental methods (S2).
2. General experimental procedure and characterization data (S2-S14).
3. <sup>1</sup>H & <sup>13</sup>C NMR spectra of compounds **4-6** (S15-S68).

### General experimental methods:

All reactions were performed in reaction tubes. Flash column chromatography was performed using silica gel (60-Å pore size, 32–63 μm, standard grade). Analytical thin-layer chromatography was performed using glass plates pre-coated with 0.25 mm 230–400 mesh silica gel impregnated with a fluorescent indicator (254 nm). Thin layer chromatography plates were visualized by exposure to ultraviolet light. Organic solutions were concentrated on rotary evaporators at ~20 Torr (house vacuum) at 25–35°C. Commercial reagents and solvents were used as received. Nuclear magnetic resonance (NMR) spectra are recorded in parts per million from internal tetramethylsilane on the δ scale. <sup>1</sup>H and <sup>13</sup>C NMR spectra were recorded in CDCl<sub>3</sub> on a Bruker DRX-400 spectrometer operating at 400 MHz and 100 MHz, respectively. All chemical shift values are quoted in ppm and coupling constants quoted in Hz. High resolution mass spectrometry (HRMS) spectra were obtained on a micrOTOF II Instrument. IR spectra were run on a FTIR-360 spectrophotometer.

*General experimental procedure for palladium-catalyzed three-component reaction of 2-alkynylbromobenzene, 2-alkynylaniline, and electrophile.*

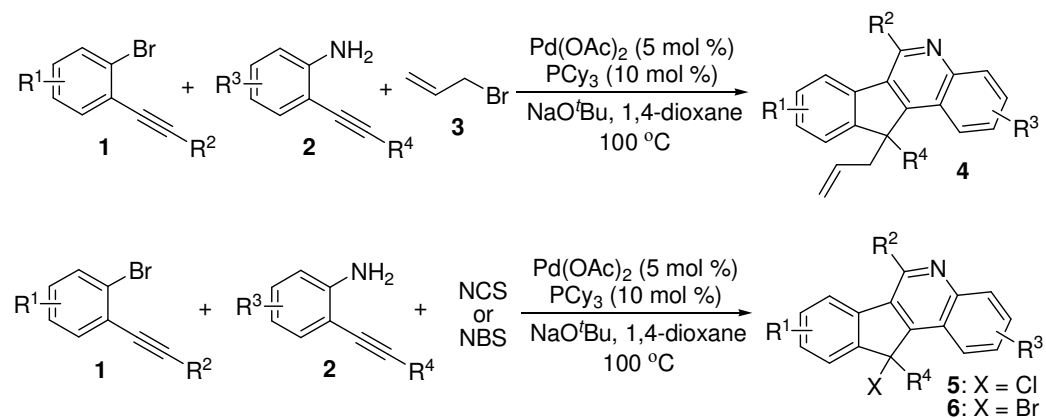

2-Alkynylbromobenzene (0.24 mmol) was added to a mixture of Pd(OAc)<sub>2</sub> (5 mol %), tricyclohexylphosphine (10 mol %), *t*-BuONa (0.8 mmol), and 2-alkynylaniline (0.20 mmol) in 1,4-dioxane (2.0 mL). The mixture was heated at 100 °C. After 2-alkynylaniline was consumed completely, an electrophile (allylic bromide, NBS or NCS, 0.3 mmol) was added to the mixture. After completion of the reaction as

indicated by TLC, the reaction was cooled and the solvent was diluted by EtOAc (10 mL), washed with saturated brine ( $2 \times 10$  mL), and dried by anhydrous  $\text{Na}_2\text{SO}_4$ . Evaporation of the solvent followed by purification on silica gel provides the product (11*H*-indeno[1,2-*c*]quinolines **4-6**).

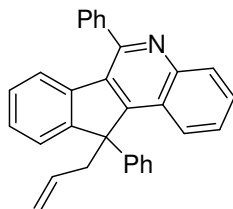

11-Allyl-6,11-diphenyl-11*H*-indeno[1,2-*c*]quinoline (**4a**). IR 3058.3, 2922.9, 2845.6, 1637.9, 1599.9, 1496.0, 1456.7, 1442.5  $\text{cm}^{-1}$ .  $^1\text{H}$  NMR (400 MHz,  $\text{CDCl}_3$ )  $\delta$  8.24-8.22 (m, 1H), 7.77-7.76 (m, 2H), 7.63-7.56 (m, 5H), 7.37-7.33 (m, 1H), 7.26-7.16 (m, 7H), 7.08-7.04 (m, 1H), 7.00-6.98 (m, 1H), 4.84-4.75 (m, 1H), 4.56-4.47 (m, 2H), 3.58 (d,  $J = 7.2$  Hz, 2H).  $^{13}\text{C}$  NMR (100 MHz,  $\text{CDCl}_3$ )  $\delta$  155.8, 155.7, 152.9, 147.2, 142.7, 140.5, 138.4, 132.7, 131.6, 130.4, 128.8, 128.7, 128.6, 127.6, 127.0, 126.9, 126.5, 126.3, 124.0, 123.9, 123.6, 122.8, 117.9, 59.4, 41.3. HRMS (ESI) calcd for  $\text{C}_{31}\text{H}_{23}\text{N}$ : 410.1909 ( $\text{M} + \text{H}^+$ ), found: 410.1880.

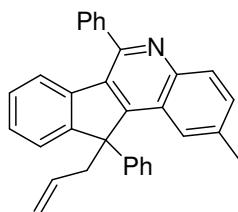

11-Allyl-2-methyl-6,11-diphenyl-11*H*-indeno[1,2-*c*]quinoline (**4b**). IR 3058.7, 2922.9, 2854.0, 1634.6, 1594.9, 1561.3, 1495.0, 1467.1, 1443.0, 1364.9  $\text{cm}^{-1}$ .  $^1\text{H}$  NMR (400 MHz,  $\text{CDCl}_3$ )  $\delta$  8.12 (d,  $J = 8.8$  Hz, 1H), 7.76-7.74 (m, 2H), 7.59-7.54 (m, 3H), 7.44 (d,  $J = 8.8$  Hz, 1H), 7.36 (s, 1H), 7.26-7.15 (m, 7H), 7.05 (t,  $J = 7.6$  Hz, 1H), 6.99-6.97 (m, 1H), 4.84-4.75 (m, 1H), 4.58-4.48 (m, 2H), 3.58 (dd,  $J = 6.8, 3.2$  Hz, 2H), 2.37 (s, 3H).  $^{13}\text{C}$  NMR (100 MHz,  $\text{CDCl}_3$ )  $\delta$  154.9, 153.0, 147.3, 145.8, 142.8, 140.7, 138.6, 136.2, 132.6, 131.8, 131.1, 130.1, 128.9, 128.8, 128.7, 128.6, 127.5, 126.9, 126.8, 126.3, 124.0, 123.6, 122.8, 117.8, 59.3, 41.1, 22.0. HRMS (ESI) calcd for  $\text{C}_{32}\text{H}_{25}\text{N}$ : 424.2065 ( $\text{M} + \text{H}^+$ ), found: 424.2066.

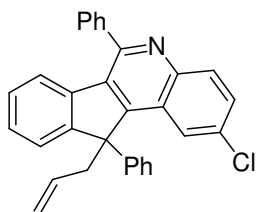

11-Allyl-2-chloro-6,11-diphenyl-11*H*-indeno[1,2-*c*]quinoline (**4c**). IR 3060.6, 2925.5, 2853.5, 1640.7, 1601.3, 1563.4, 1491.8, 1462.3, 1444.3  $\text{cm}^{-1}$ .  $^1\text{H}$  NMR (400 MHz,  $\text{CDCl}_3$ )  $\delta$  8.15 (d,  $J = 8.8$  Hz, 1H), 7.76-7.74 (m, 2H), 7.61-7.53 (m, 5H), 7.29-7.17 (m, 7H), 7.10-7.06 (m, 1H), 7.02-7.00 (m, 1H), 4.85-4.74 (m, 1H), 4.60-4.50 (m, 2H), 3.58-3.54 (m, 2H).  $^{13}\text{C}$  NMR (100 MHz,  $\text{CDCl}_3$ )  $\delta$  156.0, 154.9, 153.1, 145.5, 142.0, 140.2, 138.1, 133.5, 132.2, 132.1, 131.4, 129.0, 128.9, 128.8, 128.8, 128.7, 128.0, 127.3, 127.0, 126.3, 124.6, 123.7, 123.0, 122.6, 118.2, 59.4, 41.1. HRMS (ESI) calcd for  $\text{C}_{31}\text{H}_{22}\text{ClN}$ : 444.1519 ( $\text{M} + \text{H}^+$ ), found: 444.1503.

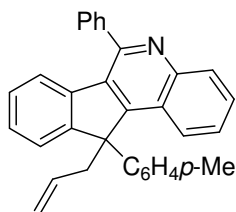

11-Allyl-6-phenyl-11-(*p*-tolyl)-11*H*-indeno[1,2-*c*]quinoline (**4d**). IR 3059.2, 2921.7, 2847.8, 1634.6, 1561.4, 1509.6, 1491.3, 1466.9, 1436.4, 1366.3  $\text{cm}^{-1}$ .  $^1\text{H}$  NMR (400 MHz,  $\text{CDCl}_3$ )  $\delta$  8.22 (d,  $J = 8.4$  Hz, 1H), 7.77-7.75 (m, 2H), 7.65-7.63 (m, 1H), 7.61-7.55 (m, 3H), 7.35 (t,  $J = 8.0$  Hz, 1H), 7.22-7.15 (m, 2H), 7.09-7.06 (m, 6H), 7.00-6.98 (m, 1H), 4.83-4.77 (m, 1H), 4.56-4.46 (m, 2H), 3.56 (d,  $J = 6.8$  Hz, 2H), 2.27 (s, 3H).  $^{13}\text{C}$  NMR (100 MHz,  $\text{CDCl}_3$ )  $\delta$  155.8, 155.07, 153.1, 147.2, 140.6, 139.6, 138.4, 136.5, 132.6, 131.8, 130.4, 129.5, 128.8, 128.8, 128.7, 128.6, 127.6, 126.8, 126.4, 126.2, 124.0, 123.9, 123.5, 122.8, 117.8, 59.1, 41.3, 20.9. HRMS (ESI) calcd for  $\text{C}_{32}\text{H}_{25}\text{N}$ : 424.2065 ( $\text{M} + \text{H}^+$ ), found: 424.2070.

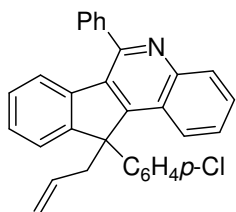

11-Allyl-11-(4-chlorophenyl)-6-phenyl-11*H*-indeno[1,2-*c*]quinoline (**4e**). IR 3061.1,

2923.6, 2852.1, 1640.2, 1565.4, 1491.6, 1463.7, 1444.0  $\text{cm}^{-1}$ .  $^1\text{H}$  NMR (400 MHz,  $\text{CDCl}_3$ )  $\delta$  8.24 (d,  $J = 8.8$  Hz, 1H), 7.76-7.75 (m, 2H), 7.65-7.57 (m, 5H), 7.40-7.36 (m, 1H), 7.23-7.18 (m, 4H), 7.13-7.11 (m, 2H), 7.09-7.05 (m, 1H), 7.00 (d,  $J = 7.6$  Hz, 1H), 4.82-4.74 (m, 1H), 4.56-4.48 (m, 2H), 3.54 (d,  $J = 7.2$  Hz, 2H).  $^{13}\text{C}$  NMR (100 MHz,  $\text{CDCl}_3$ )  $\delta$  155.8, 155.1, 152.4, 147.2, 141.4, 140.4, 138.4, 132.8, 132.7, 131.3, 130.6, 129.0, 128.9, 128.9, 128.8, 128.7, 127.8, 127.7, 127.1, 126.6, 123.7, 123.5, 122.9, 118.2, 58.9, 41.2. HRMS (ESI) calcd for  $\text{C}_{31}\text{H}_{22}\text{ClN}$ : 444.1519 ( $\text{M} + \text{H}^+$ ), found: 444.1508.

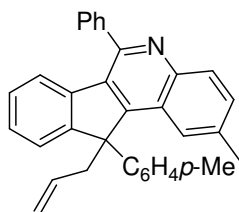

11-Allyl-2-methyl-6-phenyl-11-(p-tolyl)-11*H*-indeno[1,2-*c*]quinoline (**4f**). IR 3057.4, 2921.0, 2855.6, 1640.6, 1622.4, 1561.4, 1497.7, 1467.0, 1442.8, 1366.3  $\text{cm}^{-1}$ .  $^1\text{H}$  NMR (400 MHz,  $\text{CDCl}_3$ )  $\delta$  8.11 (d,  $J = 8.4$  Hz, 1H), 7.75 (d,  $J = 6.8$  Hz, 2H), 7.58-7.56 (m, 3H), 7.46-7.40 (m, 2H), 7.20-7.14 (m, 2H), 7.09-7.03 (m, 5H), 6.98-6.96 (m, 1H), 4.83-4.75 (m, 1H), 4.57-4.47 (m, 2H), 3.58-3.55 (m, 2H), 2.38 (s, 3H), 2.27 (s, 3H).  $^{13}\text{C}$  NMR (100 MHz,  $\text{CDCl}_3$ )  $\delta$  155.0, 154.8, 153.1, 145.8, 140.7, 139.7, 138.6, 136.4, 136.2, 132.6, 131.9, 131.1, 130.1, 129.4, 128.9, 128.7, 128.6, 127.5, 126.7, 126.1, 124.0, 123.5, 122.8, 122.7, 117.7, 59.1, 41.1, 22.0, 21.0. HRMS (ESI) calcd for  $\text{C}_{33}\text{H}_{27}\text{N}$ : 438.2222 ( $\text{M} + \text{H}^+$ ), found: 438.2208.

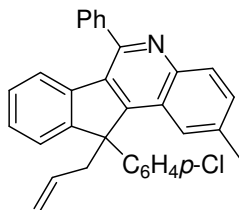

11-Allyl-11-(4-chlorophenyl)-2-methyl-6-phenyl-11*H*-indeno[1,2-*c*]quinoline (**4g**). IR 3060.3, 2921.7, 2854.4, 1643.7, 1622.4, 1561.4, 1492.0, 1467.6, 1442.2, 1364.8  $\text{cm}^{-1}$ .  $^1\text{H}$  NMR (400 MHz,  $\text{CDCl}_3$ )  $\delta$  8.12 (d,  $J = 8.8$  Hz, 1H), 7.74 (d,  $J = 6.4$  Hz, 2H), 7.59-7.54 (m, 3H), 7.48-7.45 (m, 1H), 7.32 (s, 1H), 7.24-7.21 (m, 2H), 7.18-7.11 (m, 4H), 7.08-7.04 (m, 1H), 6.99-6.97 (m, 1H), 4.82-4.74 (m, 1H), 4.58-4.48 (m, 2H),

3.56-3.52 (m, 2H), 2.40 (s, 3H).  $^{13}\text{C}$  NMR (100 MHz,  $\text{CDCl}_3$ )  $\delta$  154.9, 154.2, 152.4, 145.9, 141.5, 140.5, 138.5, 136.5, 132.7, 132.6, 131.4, 131.3, 130.3, 128.9, 128.8, 128.7, 128.6, 127.7, 127.6, 127.0, 123.8, 123.4, 122.9, 122.5, 118.1, 58.8, 41.1, 22.0. HRMS (ESI) calcd for  $\text{C}_{32}\text{H}_{24}\text{ClN}$ : 458.1676 ( $\text{M} + \text{H}^+$ ), found: 458.1678.

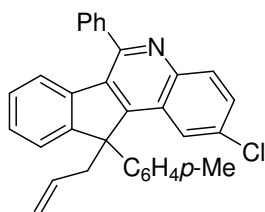

11-Allyl-2-chloro-6-phenyl-11-(p-tolyl)-11H-indeno[1,2-c]quinoline (**4h**). IR 3051.6, 2925.3, 2855.1, 1643.7, 1608.8, 1563.1, 1491.5, 1462.3, 1444.6, 1362.8  $\text{cm}^{-1}$ .  $^1\text{H}$  NMR (400 MHz,  $\text{CDCl}_3$ )  $\delta$  8.14 (d,  $J = 8.8$  Hz, 1H), 7.76-7.74 (m, 2H), 7.61-7.53 (m, 5H), 7.21-7.20 (m, 2H), 7.09-7.05 (m, 5H), 7.01-6.99 (m, 1H), 4.82-4.74 (m, 1H), 4.59-4.49 (m, 2H), 3.55-3.53 (m, 2H), 2.29 (s, 3H).  $^{13}\text{C}$  NMR (100 MHz,  $\text{CDCl}_3$ )  $\delta$  156.0, 155.0, 153.3, 145.5, 140.3, 138.9, 138.0, 136.9, 133.5, 132.1, 132.0, 131.5, 129.7, 129.0, 128.8, 128.7, 128.0, 126.9, 126.1, 124.7, 123.6, 123.0, 122.7, 118.1, 59.2, 41.2, 21.0. HRMS (ESI) calcd for  $\text{C}_{32}\text{H}_{24}\text{ClN}$ : 458.1676 ( $\text{M} + \text{H}^+$ ), found: 458.1670.

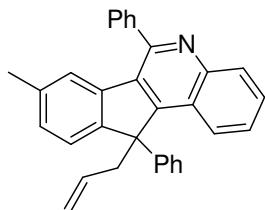

11-Allyl-8-methyl-6,11-diphenyl-11H-indeno[1,2-c]quinoline (**4i**). IR 3058.2, 2921.8, 2853.8, 1634.6, 1607.1, 1567.6, 1498.3, 1463.3, 1443.8, 1372.8  $\text{cm}^{-1}$ .  $^1\text{H}$  NMR (400 MHz,  $\text{CDCl}_3$ )  $\delta$  8.23-8.21 (m, 1H), 7.77-7.75 (m, 2H), 7.62-7.58 (m, 5H), 7.37-7.33 (m, 1H), 7.26-7.18 (m, 5H), 7.10 (d,  $J = 7.6$  Hz, 1H), 7.00 (d,  $J = 8.0$  Hz, 1H), 6.77 (s, 1H), 4.85-4.79 (m, 1H), 4.57-4.47 (m, 2H), 3.56 (d,  $J = 6.8$  Hz, 2H), 2.17 (s, 3H).  $^{13}\text{C}$  NMR (100 MHz,  $\text{CDCl}_3$ )  $\delta$  156.0, 155.8, 150.2, 147.2, 143.0, 140.6, 138.6, 136.5, 132.8, 131.9, 130.5, 128.9, 128.8, 128.8, 128.7, 128.6, 128.5, 126.9, 126.4, 126.3, 125.2, 124.0, 123.6, 123.3, 117.8, 59.1, 41.3, 21.6. HRMS (ESI) calcd for  $\text{C}_{32}\text{H}_{25}\text{N}$ : 424.2065 ( $\text{M} + \text{H}^+$ ), found: 424.2057.

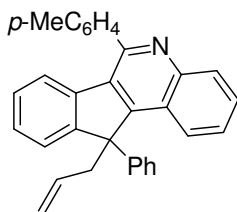

11-Allyl-11-phenyl-6-(p-tolyl)-11*H*-indeno[1,2-*c*]quinoline (**4j**). IR 3060.4, 2922.5, 2853.2, 1640.4, 1608.8, 1582.5, 1500.1, 1464.1, 1445.1, 1414.0  $\text{cm}^{-1}$ .  $^1\text{H}$  NMR (400 MHz,  $\text{CDCl}_3$ )  $\delta$  8.22-8.20 (m, 1H), 7.66 (d,  $J = 7.6$  Hz, 2H), 7.61-7.59 (m, 2H), 7.39 (d,  $J = 8.0$  Hz, 2H), 7.34 (t,  $J = 7.6$  Hz, 1H), 7.26-7.18 (m, 7H), 7.09 (s, 2H), 4.83-4.77 (m, 1H), 4.56-4.46 (m, 2H), 3.58 (d,  $J = 7.2$  Hz, 2H), 2.50 (s, 3H).  $^{13}\text{C}$  NMR (100 MHz,  $\text{CDCl}_3$ )  $\delta$  155.9, 155.6, 152.9, 147.3, 142.8, 138.6, 137.7, 132.7, 131.7, 130.4, 129.3, 128.8, 128.7, 127.5, 127.0, 126.8, 126.4, 126.3, 124.0, 123.9, 123.6, 122.9, 117.9, 59.4, 41.3, 21.5. HRMS (ESI) calcd for  $\text{C}_{32}\text{H}_{25}\text{N}$ : 424.2065 ( $\text{M} + \text{H}^+$ ), found: 424.2062.

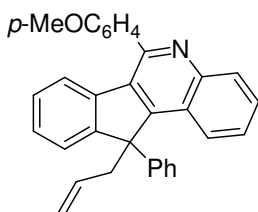

11-Allyl-6-(4-methoxyphenyl)-11-phenyl-11*H*-indeno[1,2-*c*]quinoline (**4k**). IR 3053.7, 2928.3, 2853.7, 1641.5, 1608.9, 1573.1, 1501.7, 1465.1, 1444.3, 1377.8, 1265.1, 1032.4  $\text{cm}^{-1}$ .  $^1\text{H}$  NMR (400 MHz,  $\text{CDCl}_3$ )  $\delta$  8.21 (d,  $J = 8.8$  Hz, 1H), 7.72 (d,  $J = 8.8$  Hz, 2H), 7.60 (d,  $J = 7.6$  Hz, 2H), 7.36-7.32 (m, 1H), 7.26-7.19 (m, 7H), 7.13-7.09 (m, 4H), 4.83-4.75 (m, 1H), 4.57-4.47 (m, 2H), 3.94 (s, 3H), 3.58 (d,  $J = 6.8$  Hz, 2H).  $^{13}\text{C}$  NMR (100 MHz,  $\text{CDCl}_3$ )  $\delta$  160.1, 155.7, 155.6, 152.9, 147.3, 142.8, 138.7, 133.1, 132.8, 131.7, 130.4, 130.3, 128.8, 128.7, 127.6, 127.0, 126.9, 126.4, 126.3, 124.0, 123.8, 123.6, 122.9, 117.9, 114.0, 59.4, 41.3, 29.7. HRMS (ESI) calcd for  $\text{C}_{32}\text{H}_{25}\text{NO}$ : 440.2014 ( $\text{M} + \text{H}^+$ ), found: 440.2000.

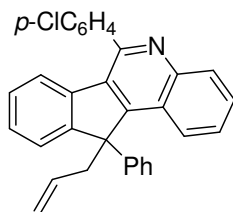

11-Allyl-6-(4-chlorophenyl)-11-phenyl-11*H*-indeno[1,2-*c*]quinoline (**4l**). IR 3060.8, 2924.4, 2853.6, 1646.7, 1596.6, 1565.3, 1491.4, 1464.8, 1445.0  $\text{cm}^{-1}$ .  $^1\text{H}$  NMR (400 MHz,  $\text{CDCl}_3$ )  $\delta$  8.21-8.19 (m, 1H), 7.73 (d,  $J = 8.4$  Hz, 2H), 7.63-7.56 (m, 4H), 7.37-7.34 (m, 1H), 7.26-7.18 (m, 7H), 7.13-7.06 (m, 2H), 4.84-4.74 (m, 1H), 4.55-4.46 (m, 2H), 3.58 (d,  $J = 7.2$  Hz, 2H).  $^{13}\text{C}$  NMR (100 MHz,  $\text{CDCl}_3$ )  $\delta$  156.0, 154.4, 152.9, 147.2, 142.6, 139.0, 138.2, 134.9, 132.5, 131.6, 130.4, 129.0, 128.9, 128.8, 127.8, 127.0, 126.9, 126.7, 126.3, 124.0, 123.7, 122.6, 118.0, 59.4, 41.3. HRMS (ESI) calcd for  $\text{C}_{31}\text{H}_{22}\text{ClN}$ : 444.1519 ( $\text{M} + \text{H}^+$ ), found: 444.1516.

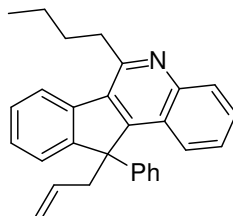

11-Allyl-6-butyl-11-phenyl-11*H*-indeno[1,2-*c*]quinoline (**4m**). IR 3055.7, 2926.1, 2857.6, 1646.7, 1598.6, 1573.6, 1494.3, 1466.9, 1442.5, 1405.9  $\text{cm}^{-1}$ .  $^1\text{H}$  NMR (400 MHz,  $\text{CDCl}_3$ )  $\delta$  8.13 (d,  $J = 8.2$  Hz, 1H), 7.92 (d,  $J = 7.8$  Hz, 1H), 7.62-7.54 (m, 2H), 7.44-7.38 (m, 1H), 7.29-7.21 (m, 6H), 7.14-7.12 (m, 2H), 4.69-4.65 (m, 1H), 4.51-4.47 (m, 1H), 4.41-4.39 (m, 1H), 3.55-3.45 (m, 2H), 1.96-1.94 (m, 2H), 1.69-1.61 (m, 3H), 1.26 (s, 1H), 1.07-1.04 (m, 3H).  $^{13}\text{C}$  NMR (100 MHz,  $\text{CDCl}_3$ )  $\delta$  158.2, 155.1, 153.2, 147.2, 142.8, 138.8, 128.8, 128.5, 127.5, 127.4, 126.3, 124.0, 123.8, 122.7, 117.8, 59.3, 41.2, 37.9, 30.6, 23.1. HRMS (ESI) calcd for  $\text{C}_{29}\text{H}_{27}\text{N}$ : 390.2222 ( $\text{M} + \text{H}^+$ ), found: 390.2236.

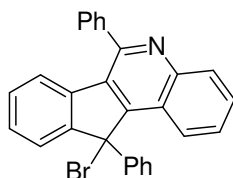

11-Bromo-6,11-diphenyl-11*H*-indeno[1,2-*c*]quinoline (**5a**). IR 3058.8, 2926.0, 2854.5,



1596.5, 1583.2, 1499.3, 1444.7  $\text{cm}^{-1}$ .  $^1\text{H}$  NMR (400 MHz,  $\text{CDCl}_3$ )  $\delta$  8.26 (d,  $J = 8.4$  Hz, 1H), 7.78-7.75 (m, 3H), 7.68-7.64 (m, 1H), 7.61-7.57 (m, 3H), 7.52-7.42 (m, 4H), 7.28-7.27 (m, 3H), 7.24-7.19 (m, 1H), 7.10-7.06 (m, 1H), 6.99-6.97 (m, 1H).  $^{13}\text{C}$  NMR (100 MHz,  $\text{CDCl}_3$ )  $\delta$  156.0, 153.0, 151.3, 148.1, 140.0, 139.1, 135.7, 130.3, 129.6, 129.1, 128.9, 128.8, 128.7, 128.6, 128.5, 128.4, 128.3, 127.1, 126.7, 125.5, 125.1, 122.8, 123.4, 65.5. HRMS (ESI) calcd for  $\text{C}_{28}\text{H}_{18}\text{BrN}$ : 448.0701 ( $\text{M} + \text{H}^+$ ), found: 448.0696.

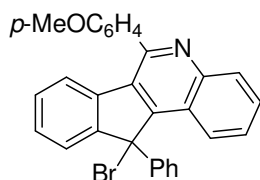

11-Bromo-6-(4-methoxyphenyl)-11-phenyl-11*H*-indeno[1,2-*c*]quinoline (**5b**). IR 3054.4, 2986.1, 2932.0, 1609.0, 1563.1, 1501.9, 1465.4, 1442.4, 1265.2, 1034.0  $\text{cm}^{-1}$ .  $^1\text{H}$  NMR (400 MHz,  $\text{CDCl}_3$ )  $\delta$  8.25 (d,  $J = 8.4$  Hz, 1H), 7.77-7.71 (m, 3H), 7.67-7.63 (m, 1H), 7.51-7.49 (m, 3H), 7.44-7.41 (m, 1H), 7.28-7.27 (m, 3H), 7.25-7.20 (m, 1H), 7.13-7.11 (m, 4H), 3.93 (s, 3H).  $^{13}\text{C}$  NMR (100 MHz,  $\text{CDCl}_3$ )  $\delta$  160.3, 155.7, 153.1, 151.3, 148.1, 139.1, 135.9, 132.4, 130.3, 130.2, 129.8, 129.5, 128.7, 128.6, 128.5, 128.3, 127.1, 126.6, 125.5, 123.4, 122.6, 114.1, 65.6, 55.4. HRMS (ESI) calcd for  $\text{C}_{29}\text{H}_{20}\text{BrNO}$ : 478.0807 ( $\text{M} + \text{H}^+$ ), found: 478.0784.

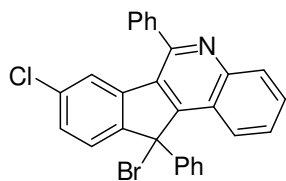

11-Bromo-8-chloro-6,11-diphenyl-11*H*-indeno[1,2-*c*]quinoline (**5c**). IR 3059.6, 2924.7, 2851.9, 1597.2, 1576.5, 1492.1, 1460.4  $\text{cm}^{-1}$ .  $^1\text{H}$  NMR (400 MHz,  $\text{CDCl}_3$ )  $\delta$  8.27 (d,  $J = 8.8$  Hz, 1H), 7.77-7.75 (m, 3H), 7.72-7.67 (m, 1H), 7.63-7.61 (m, 3H), 7.49-7.44 (m, 1H), 7.38 (d,  $J = 8.4$  Hz, 3H), 7.30-7.28 (m, 3H), 7.18 (dd,  $J = 8.4, 2.0$  Hz, 1H), 6.94 (m, 1H).  $^{13}\text{C}$  NMR (100 MHz,  $\text{CDCl}_3$ )  $\delta$  155.9, 153.7, 149.5, 148.4, 139.5, 138.5, 137.5, 134.6, 130.4, 130.0, 129.4, 128.9, 128.8, 128.7, 128.6, 128.5, 127.0, 126.9, 126.5, 125.1, 123.6, 122.6, 67.0. HRMS (ESI) calcd for  $\text{C}_{28}\text{H}_{17}\text{BrClN}$ : 482.0311 ( $\text{M} + \text{H}^+$ ), found: 482.0305.

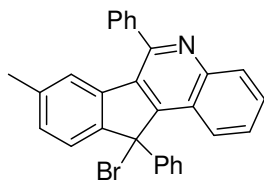

11-Bromo-8-methyl-6,11-diphenyl-11*H*-indeno[1,2-*c*]quinoline (**5d**). IR 3058.5, 2924.1, 2852.2, 1610.2, 1567.5, 1492.8, 1469.9, 1444.2, 1369.7  $\text{cm}^{-1}$ .  $^1\text{H}$  NMR (400 MHz,  $\text{CDCl}_3$ )  $\delta$  8.25 (d,  $J = 8.4$  Hz, 1H), 7.78-7.75 (m, 3H), 7.68-7.64 (m, 1H), 7.61-7.58 (m, 3H), 7.51-7.49 (m, 2H), 7.46-7.42 (m, 1H), 7.36 (d,  $J = 8.0$  Hz, 1H) 7.28-7.26 (m, 3H), 7.03 (d,  $J = 7.6$  Hz, 1H), 6.77 (s, 1H), 2.16 (s, 3H).  $^{13}\text{C}$  NMR (100 MHz,  $\text{CDCl}_3$ )  $\delta$  156.0, 153.4, 148.6, 148.1, 140.1, 139.3, 138.6, 135.9, 130.3, 129.7, 129.5, 129.4, 129.1, 128.8, 128.7, 128.2, 127.0, 126.7, 125.2, 125.1, 124.1, 122.8, 67.0, 21.6. HRMS (ESI) calcd for  $\text{C}_{29}\text{H}_{20}\text{BrN}$ : 462.0857 ( $\text{M} + \text{H}^+$ ), found: 462.0849.

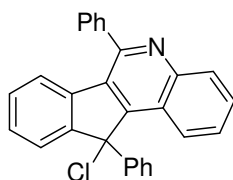

11-Chloro-6,11-diphenyl-11*H*-indeno[1,2-*c*]quinoline (**6a**). IR 3059.7, 2927.0, 2852.6, 1599.4, 1584.3, 1493.3, 1445.4  $\text{cm}^{-1}$ .  $^1\text{H}$  NMR (400 MHz,  $\text{CDCl}_3$ )  $\delta$  8.26 (d,  $J = 8.4$  Hz, 1H), 7.79-7.77 (m, 3H), 7.68-7.65 (m, 1H), 7.60-7.59 (m, 3H), 7.49-7.40 (m, 4H), 7.30-7.28 (m, 3H), 7.24-7.19 (m, 1H), 7.10 (t,  $J = 7.6$  Hz, 1H), 7.00-6.98 (d,  $J = 7.6$  Hz, 1H).  $^{13}\text{C}$  NMR (100 MHz,  $\text{CDCl}_3$ )  $\delta$  155.7, 152.9, 150.8, 147.9, 139.7, 139.2, 136.3, 130.6, 130.2, 129.6, 129.2, 128.8, 128.7, 128.6, 128.5, 128.3, 127.1, 126.0, 125.0, 124.7, 123.3, 122.7, 67.0. HRMS (ESI) calcd for  $\text{C}_{28}\text{H}_{18}\text{ClN}$ : 404.1206 ( $\text{M} + \text{H}^+$ ), found: 404.1182.

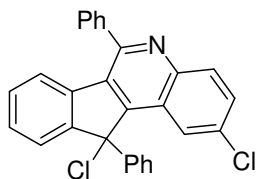

2,11-Dichloro-6,11-diphenyl-11*H*-indeno[1,2-*c*]quinoline (**6b**). IR 3056.5, 2925.3, 2855.3, 1607.1, 1573.6, 1491.3, 1462.5  $\text{cm}^{-1}$ .  $^1\text{H}$  NMR (400 MHz,  $\text{CDCl}_3$ )  $\delta$  8.16 (d,  $J = 9.2$  Hz, 1H), 7.77-7.73 (m, 3H), 7.61-7.58 (m, 4H), 7.47-7.41 (m, 3H), 7.34-7.31 (m, 3H), 7.26-7.22 (m, 1H), 7.12 (t,  $J = 8.0$  Hz, 1H), 7.01 (d,  $J = 7.6$  Hz, 1H).  $^{13}\text{C}$

NMR (100 MHz, CDCl<sub>3</sub>)  $\delta$  156.0, 151.2, 150.9, 146.4, 139.6, 138.6, 136.0, 132.9, 131.9, 131.4, 130.5, 129.3, 129.0, 128.9, 128.8, 128.7, 128.5, 125.9, 125.0, 123.5, 123.4, 67.0. HRMS (ESI) calcd for C<sub>28</sub>H<sub>17</sub>Cl<sub>2</sub>N: 438.0816 (M + H<sup>+</sup>), found: 438.0820.

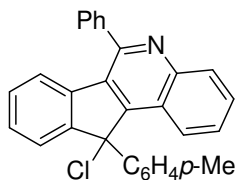

11-Chloro-6-phenyl-11-(*p*-tolyl)-11*H*-indeno[1,2-*c*]quinoline (**6c**). IR 3058.1, 2926.4, 2853.3, 1608.2, 1570.8, 1509.1, 1467.8, 1446.0, 1360.2 cm<sup>-1</sup>. <sup>1</sup>H NMR (400 MHz, CDCl<sub>3</sub>)  $\delta$  8.20 (d, *J* = 8.4 Hz, 1H), 7.81-7.75 (m, 3H), 7.68-7.65 (m, 1H), 7.60-7.58 (m, 3H), 7.43-7.41 (m, 2H), 7.36-7.34 (m, 2H), 7.24-7.19 (m, 1H), 7.10-7.09 (m, 3H), 7.98-7.97 (m, 1H), 2.30 (s, 3H). <sup>13</sup>C NMR (100 MHz, CDCl<sub>3</sub>)  $\delta$  155.8, 152.7, 151.0, 148.1, 140.1, 138.1, 136.3, 136.2, 130.3, 129.5, 129.4, 129.1, 128.9, 128.8, 128.7, 128.6, 127.0, 125.90, 124.9, 124.8, 123.3, 122.8, 73.5, 21.0. HRMS (ESI) calcd for C<sub>29</sub>H<sub>20</sub>ClN: 418.1363 (M + H<sup>+</sup>), found: 418.1384.

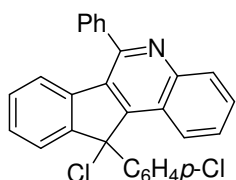

11-Chloro-11-(4-chlorophenyl)-6-phenyl-11*H*-indeno[1,2-*c*]quinoline (**6d**). IR 3058.1, 2924.4, 2847.8, 1582.7, 1579.7, 1491.3, 1451.7 cm<sup>-1</sup>. <sup>1</sup>H NMR (400 MHz, CDCl<sub>3</sub>)  $\delta$  8.24 (d, *J* = 9.2 Hz, 1H), 7.77-7.67 (m, 4H), 7.61-7.59 (m, 3H), 7.48-7.38 (m, 4H), 7.29-7.21 (m, 3H), 7.15-7.11 (m, 1H), 7.00 (d, *J* = 8.0 Hz, 1H). <sup>13</sup>C NMR (100 MHz, CDCl<sub>3</sub>)  $\delta$  155.8, 152.1, 150.4, 148.1, 139.9, 138.0, 136.4, 134.3, 130.5, 129.7, 129.2, 129.0, 128.9, 128.8, 128.7, 127.5, 127.2, 124.9, 124.5, 123.4, 122.5, 72.9. HRMS (ESI) calcd for C<sub>28</sub>H<sub>17</sub>Cl<sub>2</sub>N: 438.0816 (M + H<sup>+</sup>), found: 438.0817.

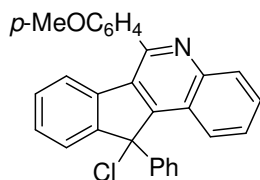

11-Chloro-6-(4-methoxyphenyl)-11-phenyl-11*H*-indeno[1,2-*c*]quinoline (**6e**). IR 3061.4, 2927.4, 2852.7, 1608.0, 1572.2, 1501.3, 1445.1, 1366.0, 1249.3, 1030.9 cm<sup>-1</sup>.

$^1\text{H}$  NMR (400 MHz,  $\text{CDCl}_3$ )  $\delta$  8.22 (d,  $J = 8.4$  Hz, 1H), 7.77-7.71 (m, 3H), 7.67-7.63 (m, 1H), 7.49-7.46 (m, 2H), 7.42-7.38 (m, 2H), 7.30-7.28 (m, 3H), 7.25-7.20 (m, 1H), 7.14-7.11 (m, 4H), 3.94 (s, 3H).  $^{13}\text{C}$  NMR (100 MHz,  $\text{CDCl}_3$ )  $\delta$  160.3, 155.6, 152.6, 150.8, 148.2, 139.3, 136.6, 132.5, 130.7, 130.3, 129.5, 128.8, 128.7, 128.5, 128.2, 126.9, 126.0, 125.0, 124.7, 123.4, 122.5, 114.1, 73.5, 55.4. HRMS (ESI) calcd for  $\text{C}_{29}\text{H}_{20}\text{ClNO}$ : 434.1312 ( $\text{M} + \text{H}^+$ ), found: 434.1340.

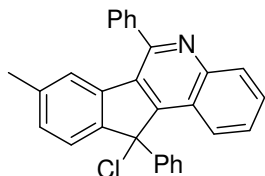

11-Chloro-8-methyl-6,11-diphenyl-11H-indeno[1,2-c]quinoline (**6f**). IR 3058.3, 2925.5, 2853.2, 1604.1, 1573.6, 1488.2, 1466.9, 1445.2, 1369.4  $\text{cm}^{-1}$ .  $^1\text{H}$  NMR (400 MHz,  $\text{CDCl}_3$ )  $\delta$  8.23 (d,  $J = 8.4$  Hz, 1H), 7.77-7.76 (m, 3H), 7.69-7.64 (m, 1H), 7.61-7.59 (m, 3H), 7.48-7.42 (m, 3H), 7.30-7.25 (m, 4H), 7.04 (d,  $J = 7.6$  Hz, 1H), 2.17 (s, 3H).  $^{13}\text{C}$  NMR (100 MHz,  $\text{CDCl}_3$ )  $\delta$  155.8, 153.1, 148.1, 148.0, 140.0, 139.5, 138.8, 136.6, 130.7, 130.3, 129.5, 129.4, 129.1, 128.9, 128.7, 128.6, 128.2, 127.0, 126.0, 124.7, 124.6, 124.1, 122.7, 73.5, 21.6. HRMS (ESI) calcd for  $\text{C}_{29}\text{H}_{20}\text{ClN}$ : 418.1363 ( $\text{M} + \text{H}^+$ ), found: 418.1367.

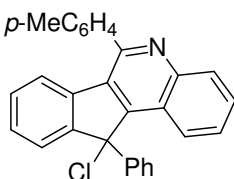

11-Chloro-11-phenyl-6-(p-tolyl)-11H-indeno[1,2-c]quinoline (**6g**). IR 3059.4, 2923.3, 2854.1, 1610.2, 1570.6, 1500.9, 1467.9, 1445.7, 1366.0  $\text{cm}^{-1}$ .  $^1\text{H}$  NMR (400 MHz,  $\text{CDCl}_3$ )  $\delta$  8.22 (d,  $J = 8.4$  Hz, 1H), 7.76 (d,  $J = 8.0$  Hz, 1H), 7.67-7.63 (m, 3H), 7.49-7.46 (m, 2H), 7.42-7.39 (m, 4H), 7.31-7.28 (m, 3H), 7.24-7.19 (m, 1H), 7.14-7.07 (m, 2H), 2.51 (s, 3H).  $^{13}\text{C}$  NMR (100 MHz,  $\text{CDCl}_3$ )  $\delta$  156.0, 152.6, 150.8, 148.2, 139.3, 139.0, 137.1, 136.6, 130.6, 130.3, 129.5, 129.4, 128.8, 128.7, 128.5, 128.2, 126.9, 126.0, 125.0, 124.7, 123.4, 122.6, 73.5, 21.5. HRMS (ESI) calcd for  $\text{C}_{29}\text{H}_{20}\text{ClN}$ : 418.1363 ( $\text{M} + \text{H}^+$ ), found: 418.1365.

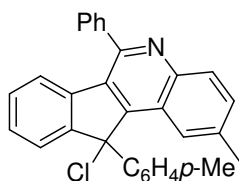

11-Chloro-2-methyl-6-phenyl-11-(p-tolyl)-11*H*-indeno[1,2-*c*]quinoline (**6h**). IR 3056.4, 2924.5, 2854.6, 1628.5, 1570.5, 1494.3, 1466.9, 1442.5, 1366.3  $\text{cm}^{-1}$ .  $^1\text{H}$  NMR (400 MHz,  $\text{CDCl}_3$ )  $\delta$  8.12 (d,  $J = 8.8$  Hz, 1H), 7.76-7.74 (m, 2H), 7.58-7.55 (m, 4H), 7.49 (d,  $J = 8.8$  Hz, 1H), 7.41 (d,  $J = 7.6$  Hz, 1H), 7.35 (d,  $J = 8.0$  Hz, 2H), 7.19 (t,  $J = 7.6$  Hz, 1H), 7.10-7.06 (m, 3H), 6.96 (d,  $J = 7.6$  Hz, 1H), 2.40 (s, 3H), 2.30 (s, 3H).  $^{13}\text{C}$  NMR (100 MHz,  $\text{CDCl}_3$ )  $\delta$  154.8, 151.8, 151.0, 146.8, 140.2, 138.0, 137.0, 136.4, 136.3, 131.9, 130.4, 130.0, 129.4, 128.9, 128.8, 128.7, 128.6, 128.4, 125.9, 124.9, 123.5, 123.2, 122.8, 73.6, 22.1, 21.0. HRMS (ESI) calcd for  $\text{C}_{30}\text{H}_{22}\text{ClN}$ : 432.1519 ( $\text{M} + \text{H}^+$ ), found: 432.1508.

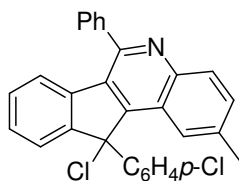

11-Chloro-11-(4-chlorophenyl)-2-methyl-6-phenyl-11*H*-indeno[1,2-*c*]quinoline (**6i**). IR 3058.5, 2924.9, 2853.6, 1588.0, 1569.1, 1490.0, 1468.3, 1444.7, 1366.1  $\text{cm}^{-1}$ .  $^1\text{H}$  NMR (400 MHz,  $\text{CDCl}_3$ )  $\delta$  8.14 (d,  $J = 8.8$  Hz, 1H), 7.76-7.74 (m, 2H), 7.60-7.58 (m, 3H), 7.53-7.48 (m, 2H), 7.42-7.37 (m, 3H), 7.29-7.20 (m, 3H), 7.13-7.09 (m, 1H), 6.98 (d,  $J = 7.6$  Hz, 1H), 2.43 (s, 3H).  $^{13}\text{C}$  NMR (100 MHz,  $\text{CDCl}_3$ )  $\delta$  154.8, 150.4, 147.3, 146.8, 139.9, 138.1, 137.4, 136.5, 134.2, 132.1, 130.1, 129.1, 129.0, 128.9, 128.8, 128.7, 128.6, 127.5, 124.8, 123.4, 123.1, 122.6, 67.0, 22.1. HRMS (ESI) calcd for  $\text{C}_{29}\text{H}_{19}\text{Cl}_2\text{N}$ : 452.0973 ( $\text{M} + \text{H}^+$ ), found: 452.0971.

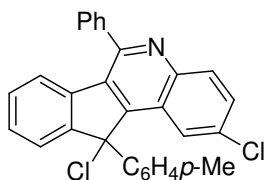

2,11-Dichloro-6-phenyl-11-(p-tolyl)-11*H*-indeno[1,2-*c*]quinoline (**6j**). IR 3056.1, 2925.8, 2852.8, 1613.2, 1566.4, 1491.7, 1462.2, 1445.3, 1364.6  $\text{cm}^{-1}$ .  $^1\text{H}$  NMR (400 MHz,  $\text{CDCl}_3$ )  $\delta$  8.15 (d,  $J = 9.2$  Hz, 1H), 7.78-7.75 (m, 3H), 7.60-7.58 (m, 4H), 7.41

(d,  $J = 7.6$  Hz, 1H), 7.33 (d,  $J = 8.0$  Hz, 2H), 7.24-7.21 (m, 1H), 7.12-7.08 (m, 3H), 7.00 (d,  $J = 8.0$  Hz, 1H), 2.31 (s, 3H).  $^{13}\text{C}$  NMR (100 MHz,  $\text{CDCl}_3$ )  $\delta$  156.0, 151.9, 151.1, 146.4, 139.7, 138.3, 135.9, 135.7, 132.8, 131.9, 131.3, 130.5, 129.6, 129.2, 128.9, 128.8, 128.7, 125.8, 125.0, 123.4, 67.0, 21.0. HRMS (ESI) calcd for  $\text{C}_{29}\text{H}_{19}\text{Cl}_2\text{N}$ : 452.0973 ( $\text{M} + \text{H}^+$ ), found: 452.0983.

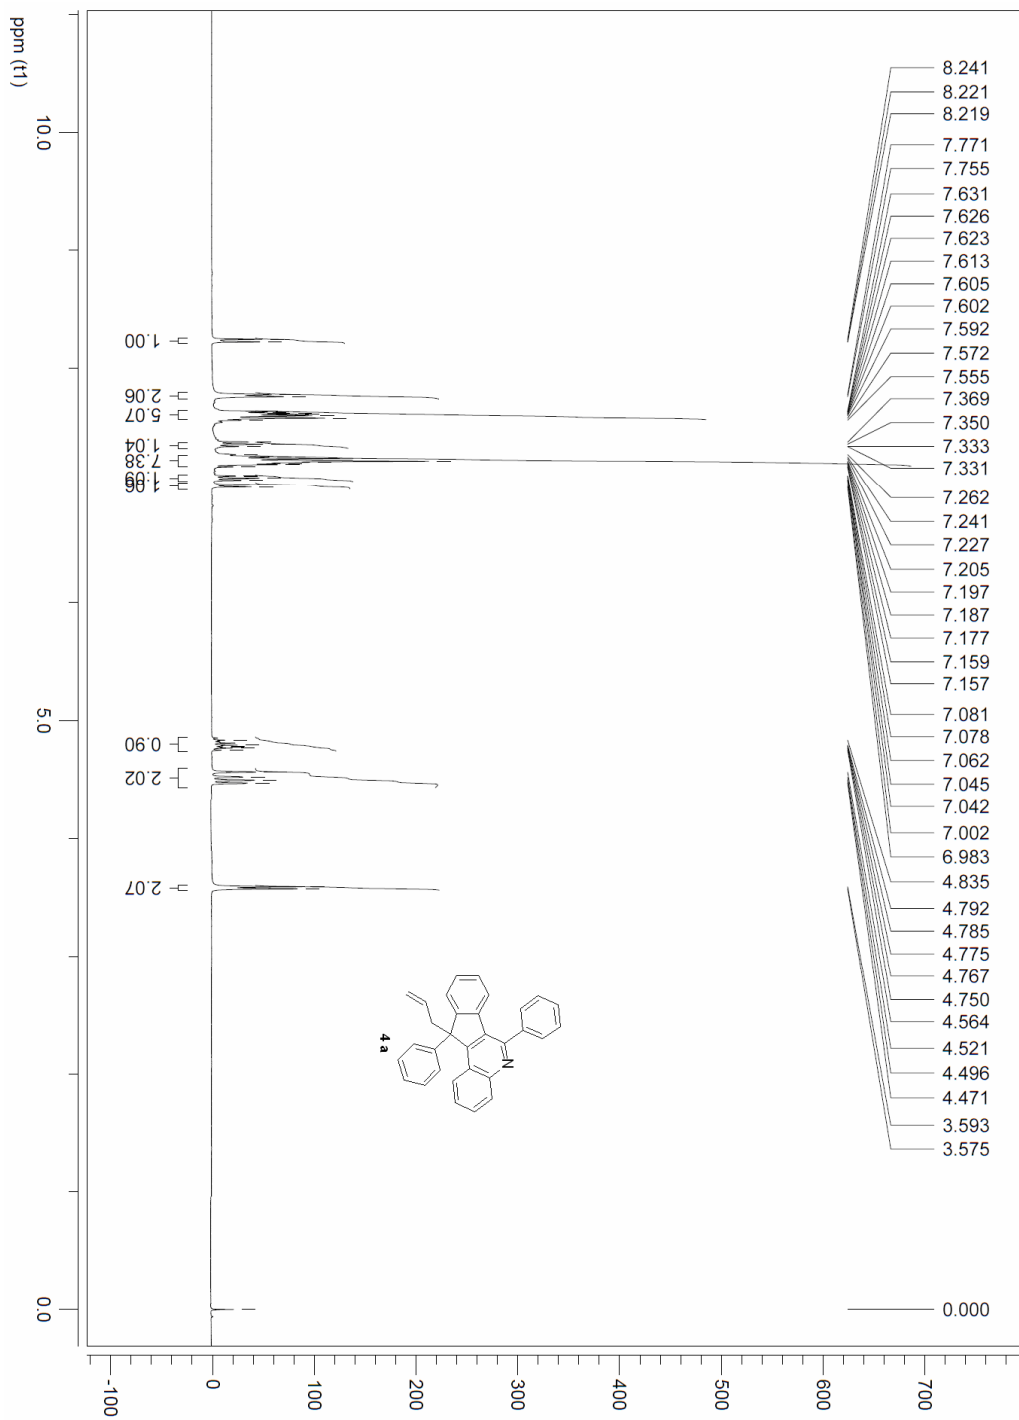

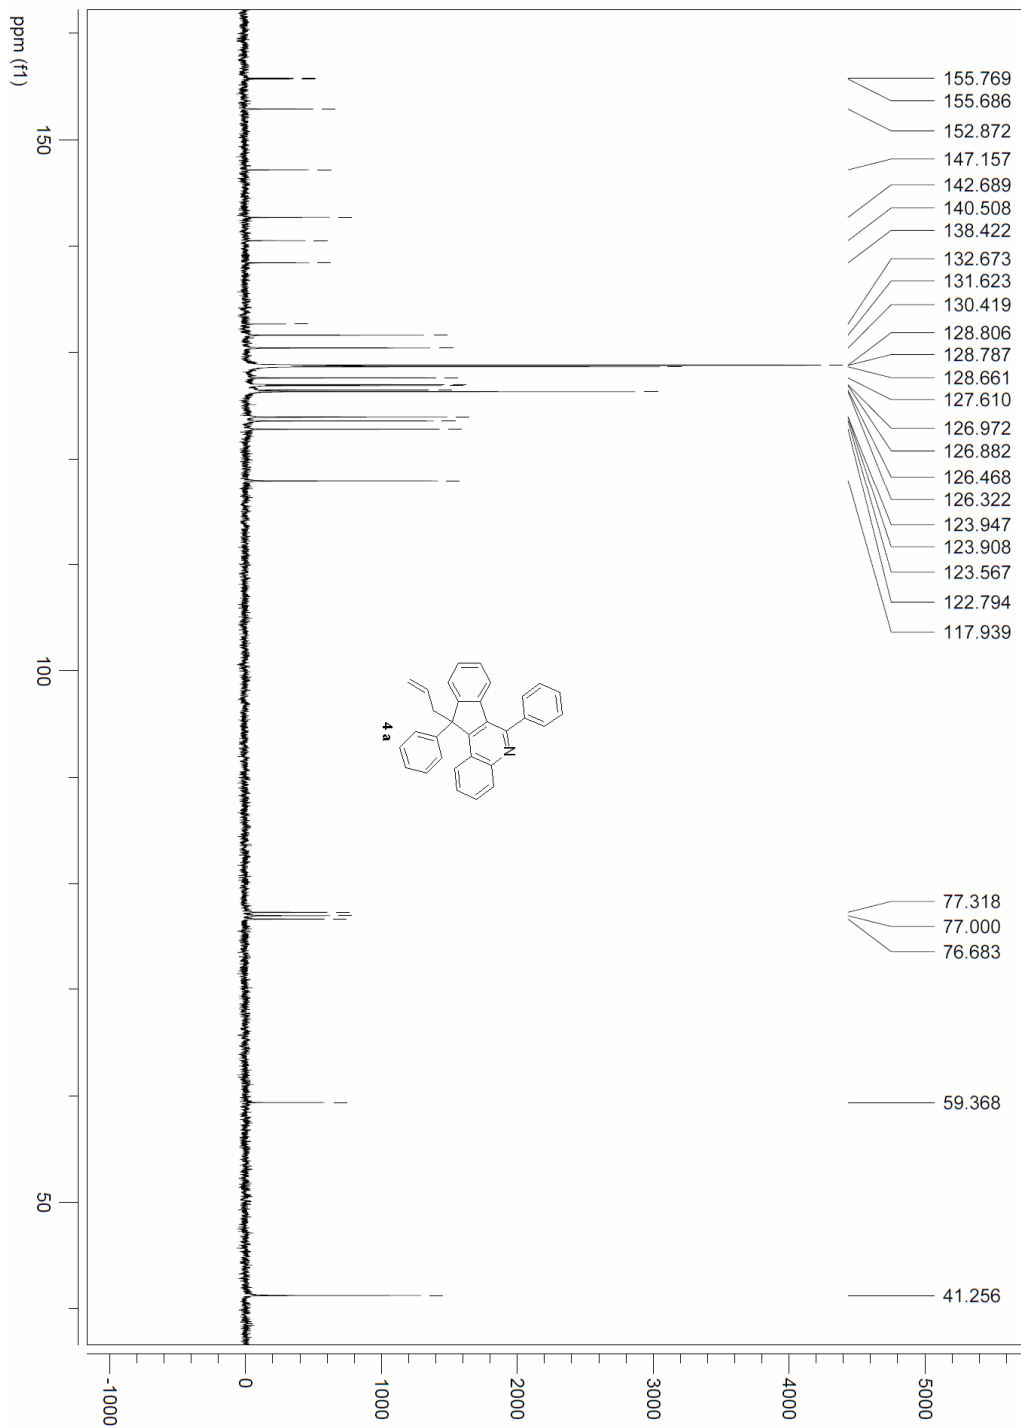



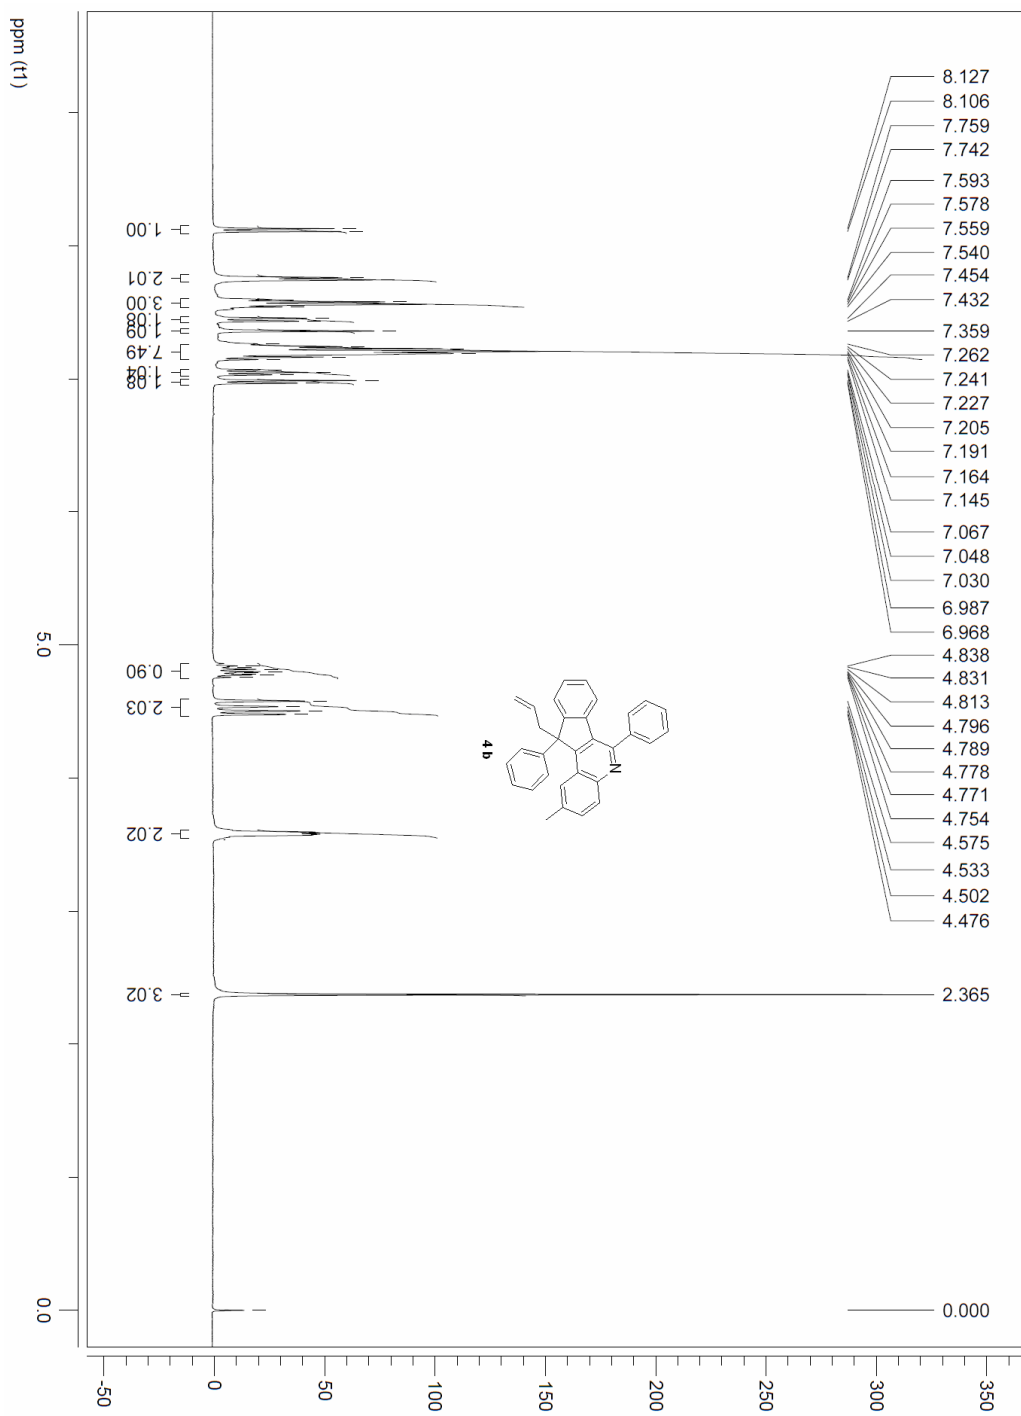

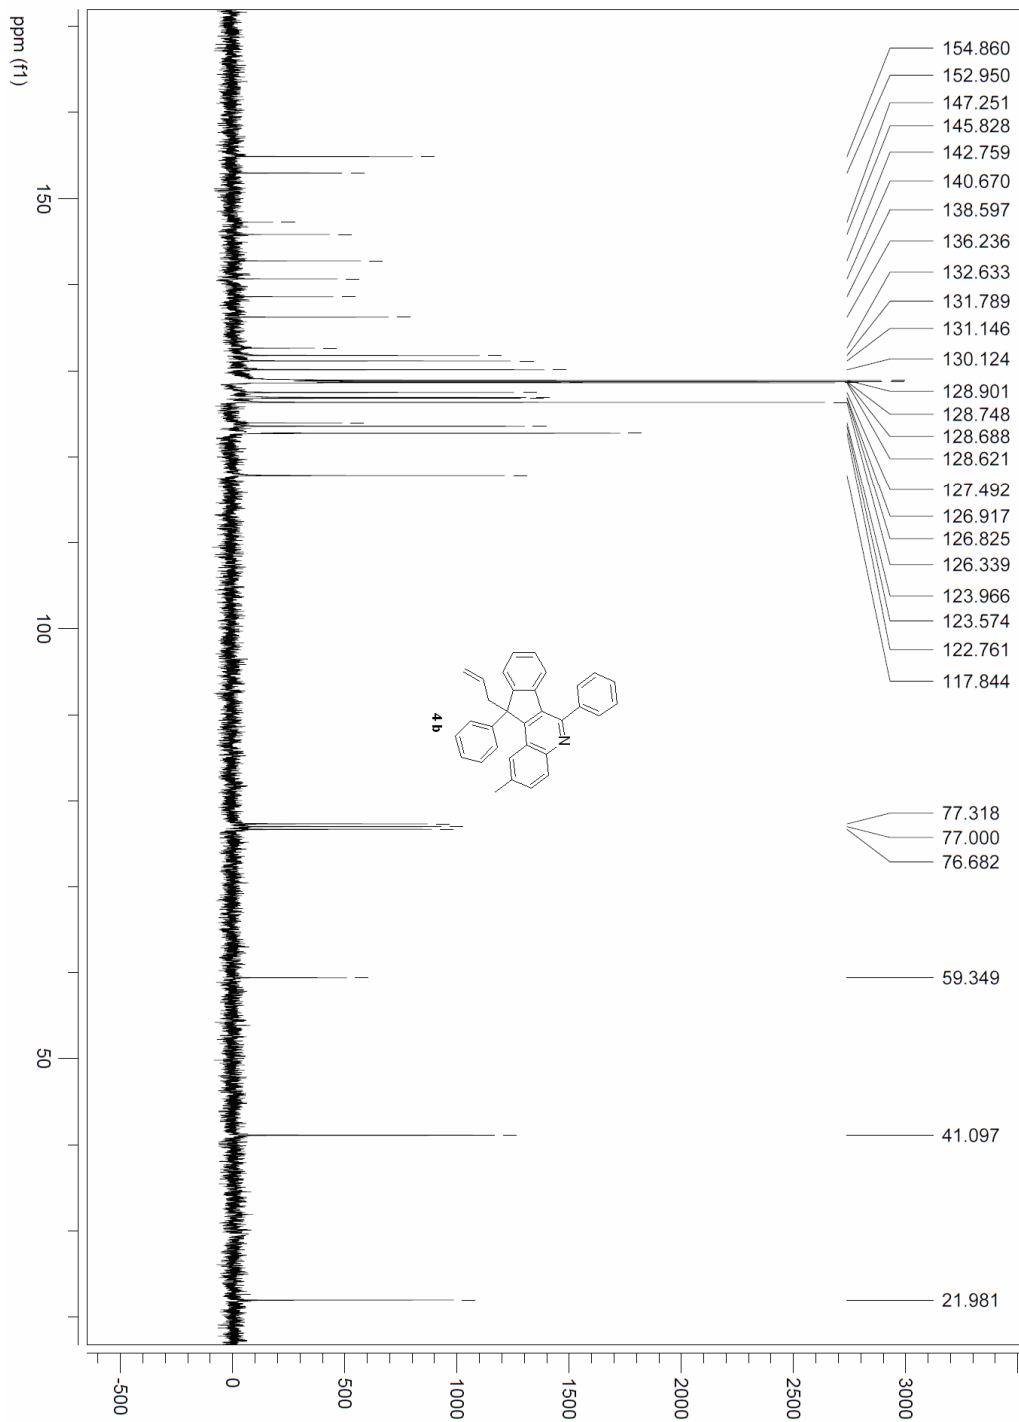

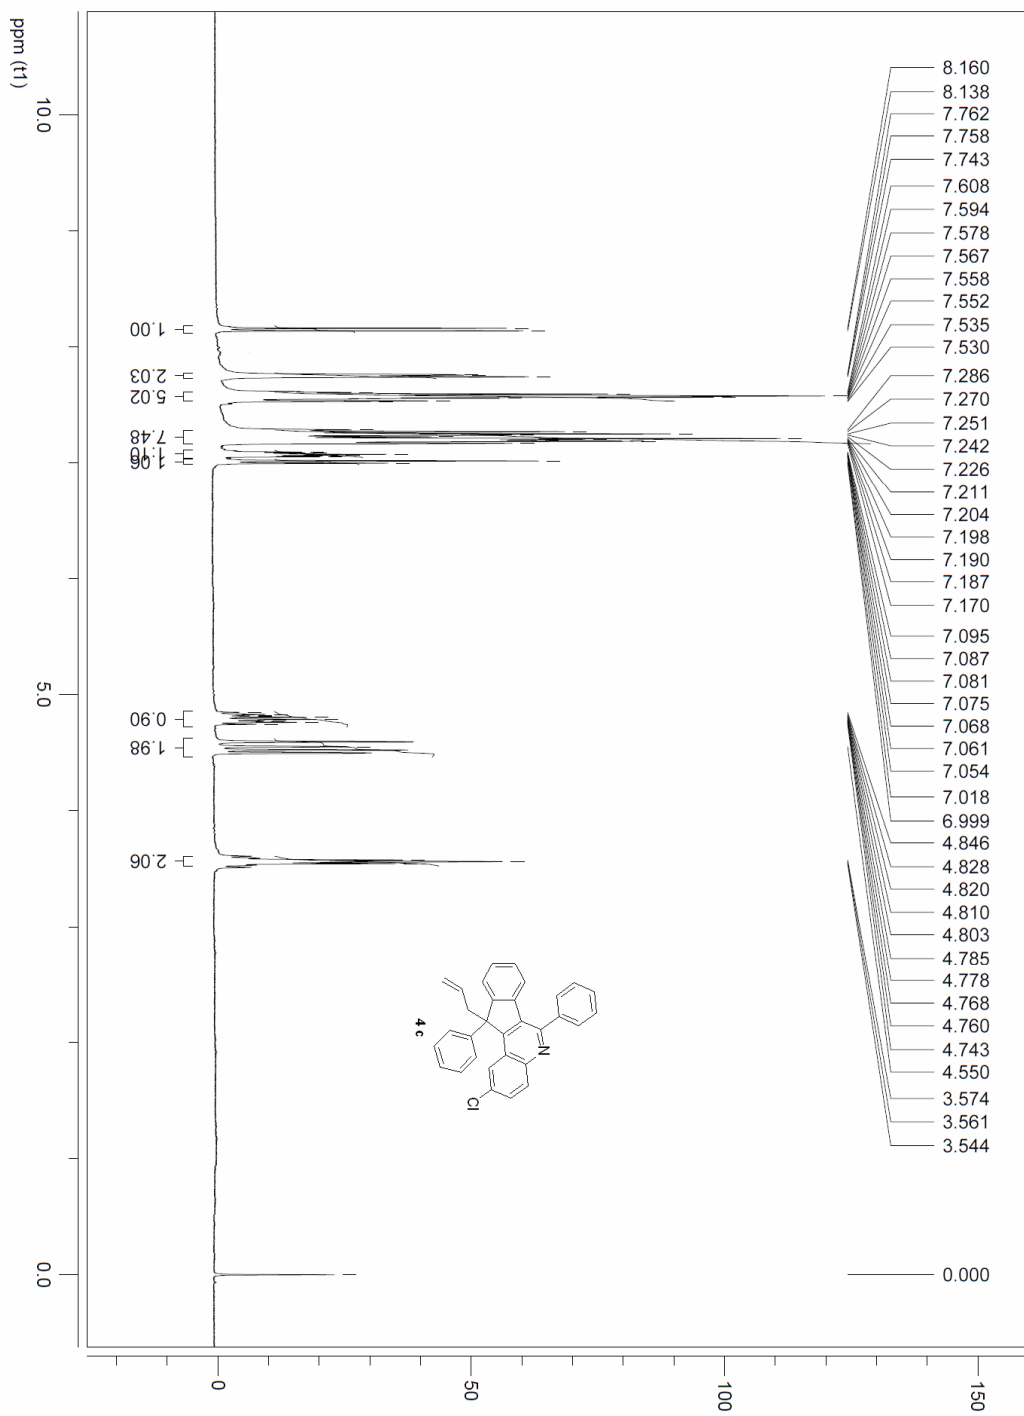

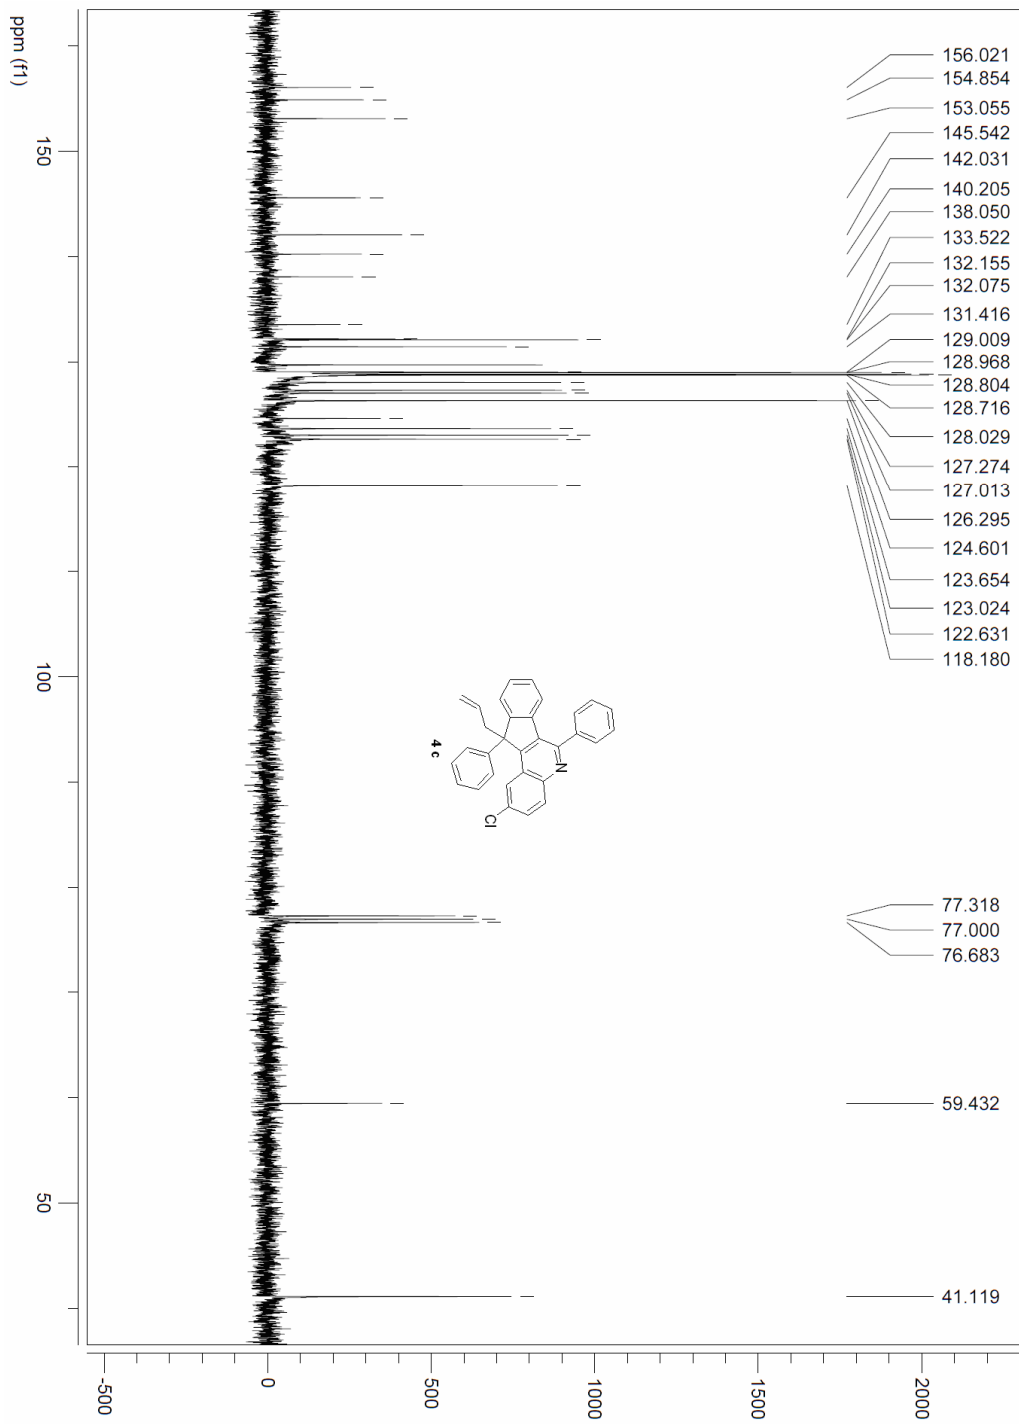

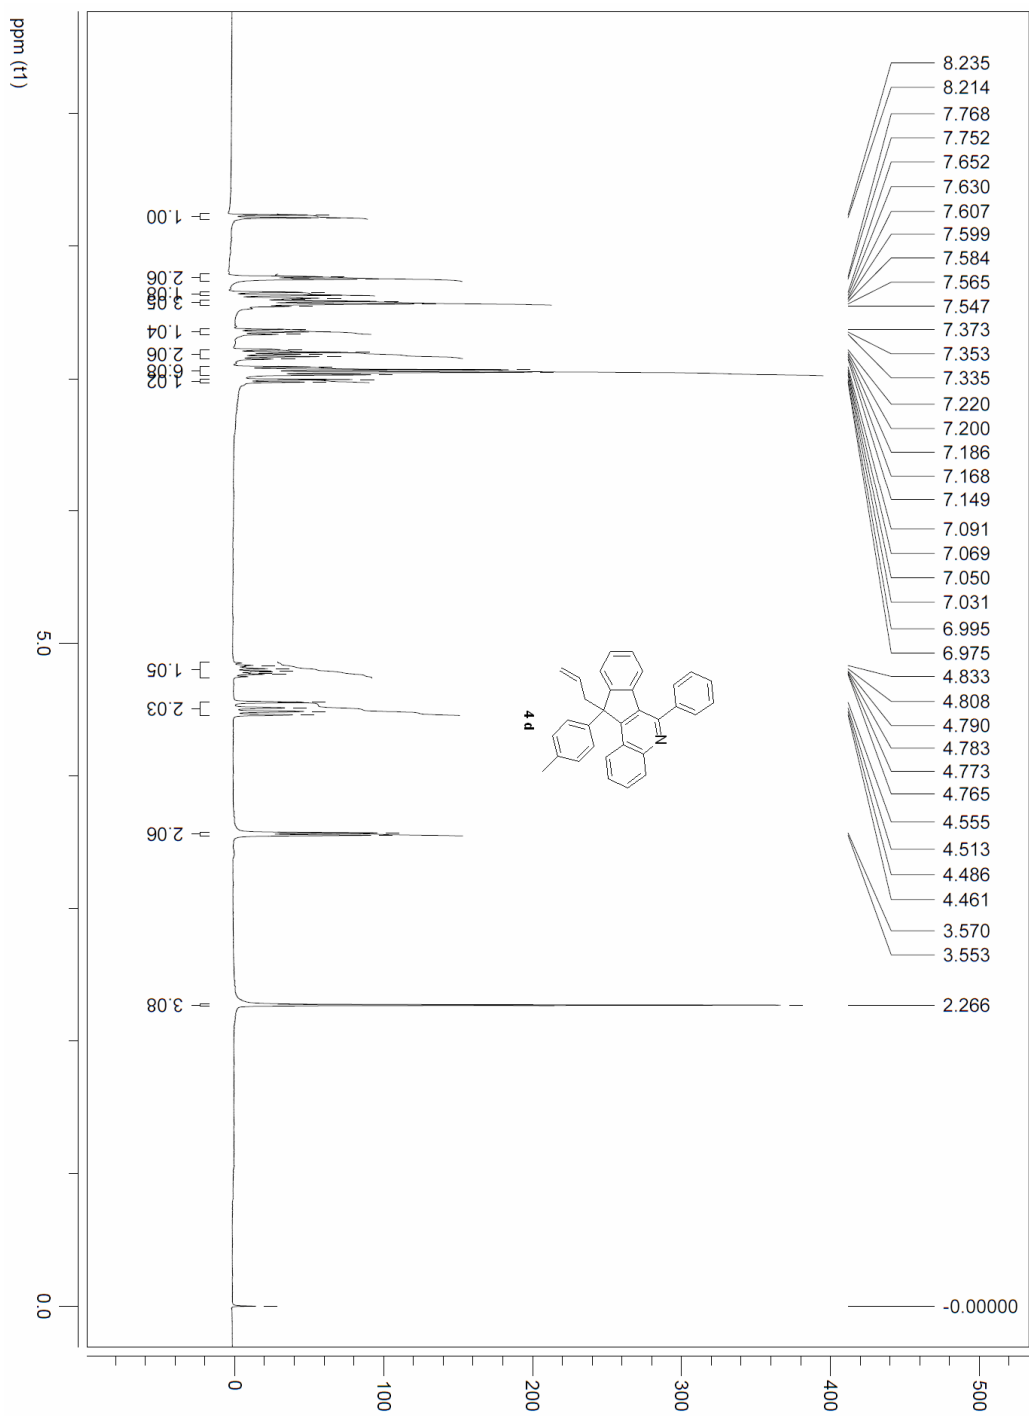

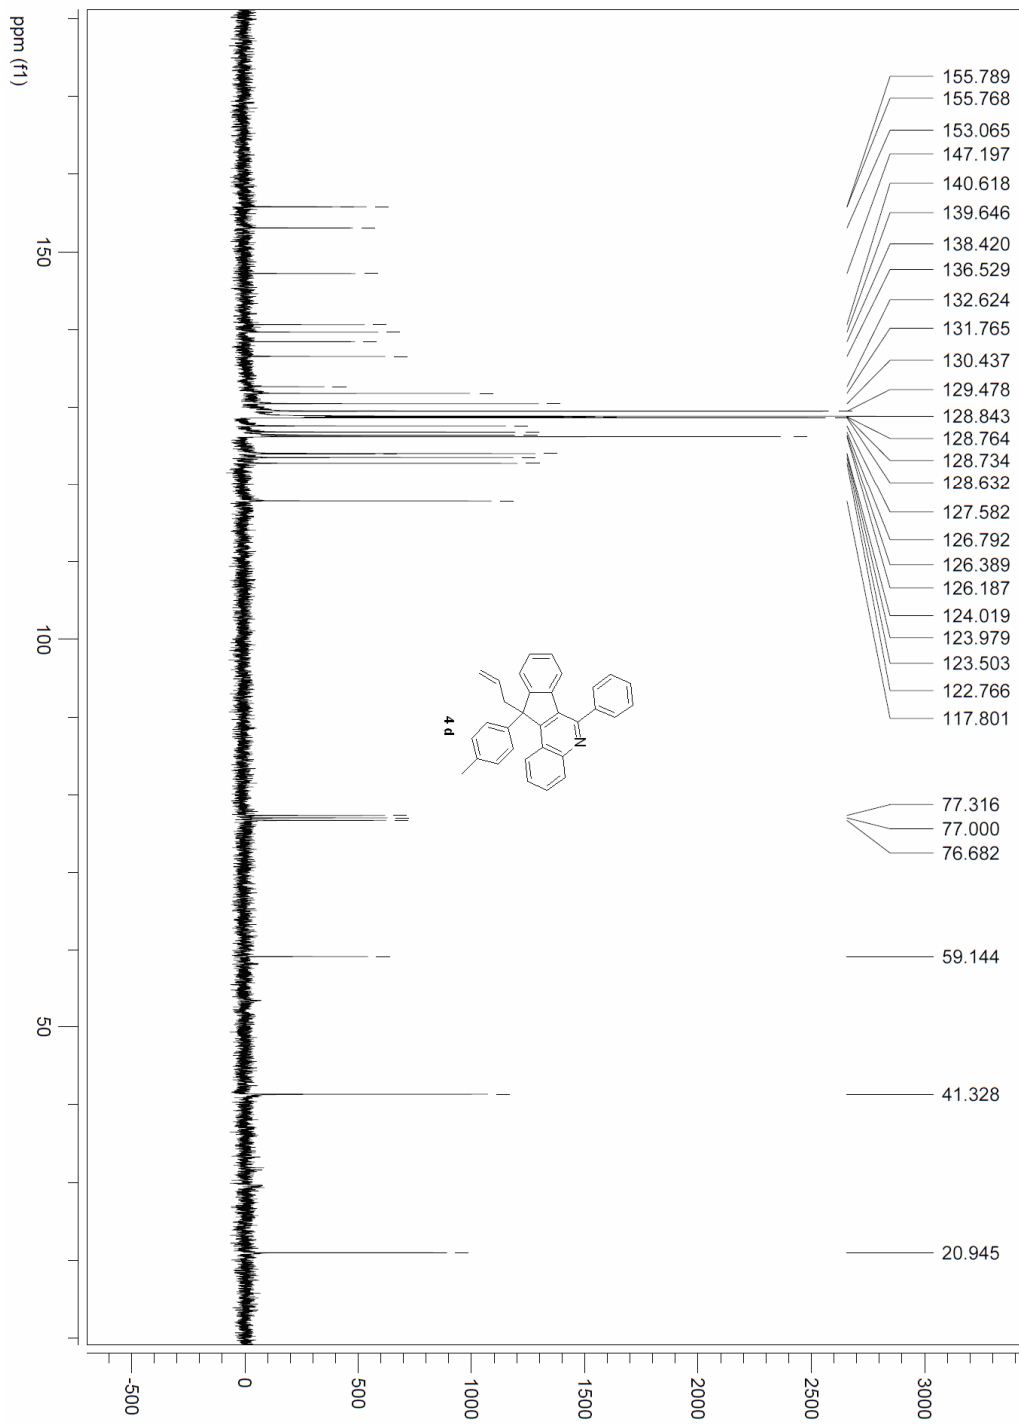

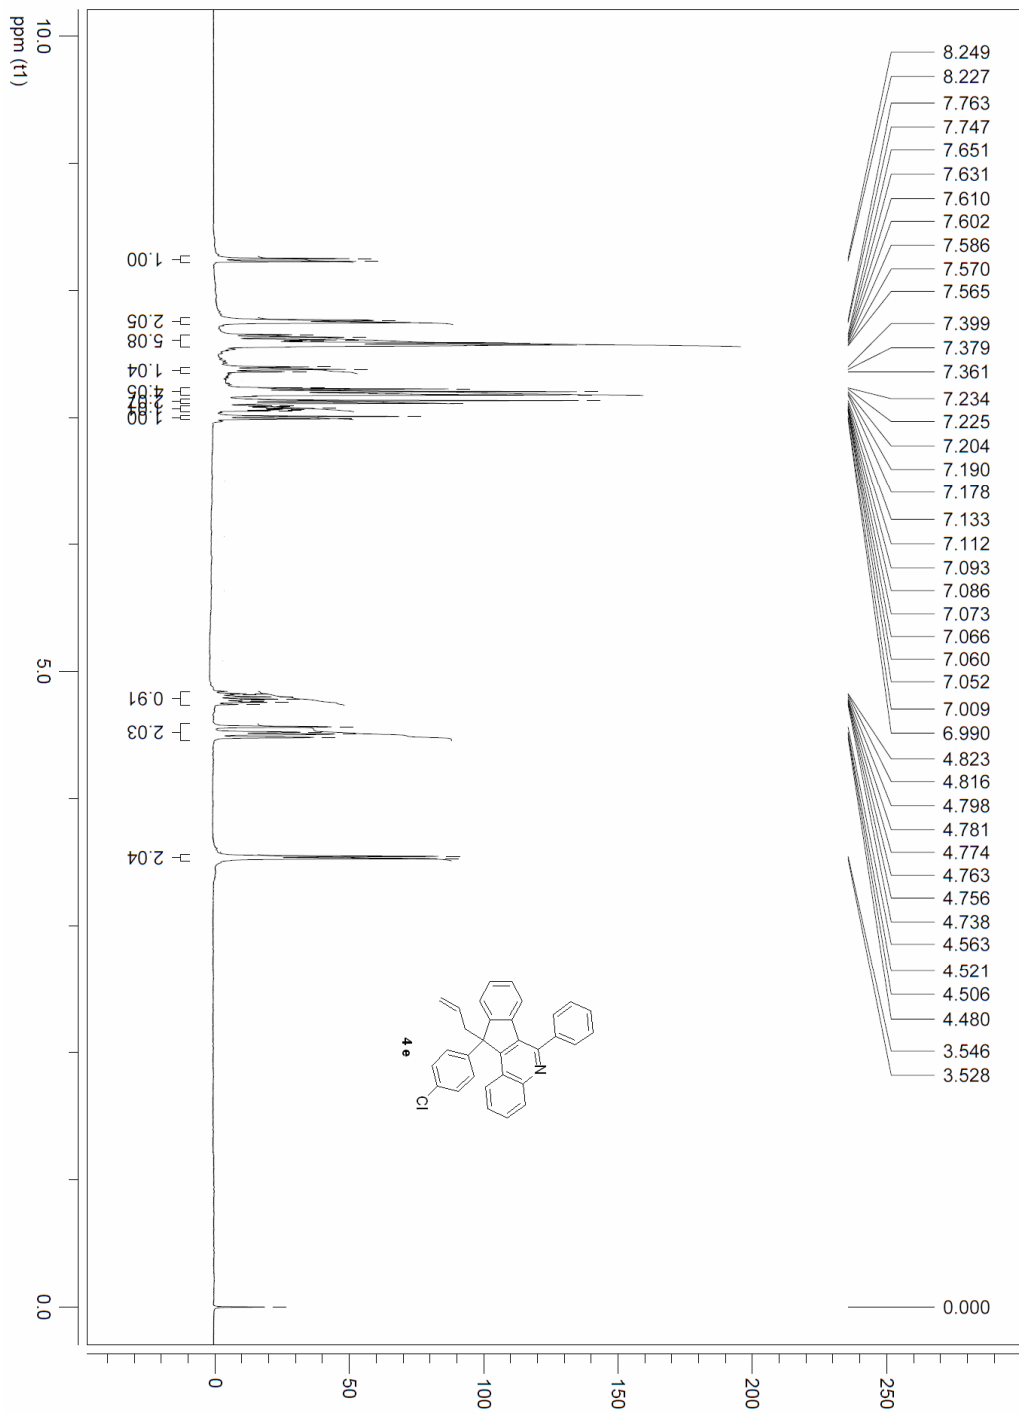

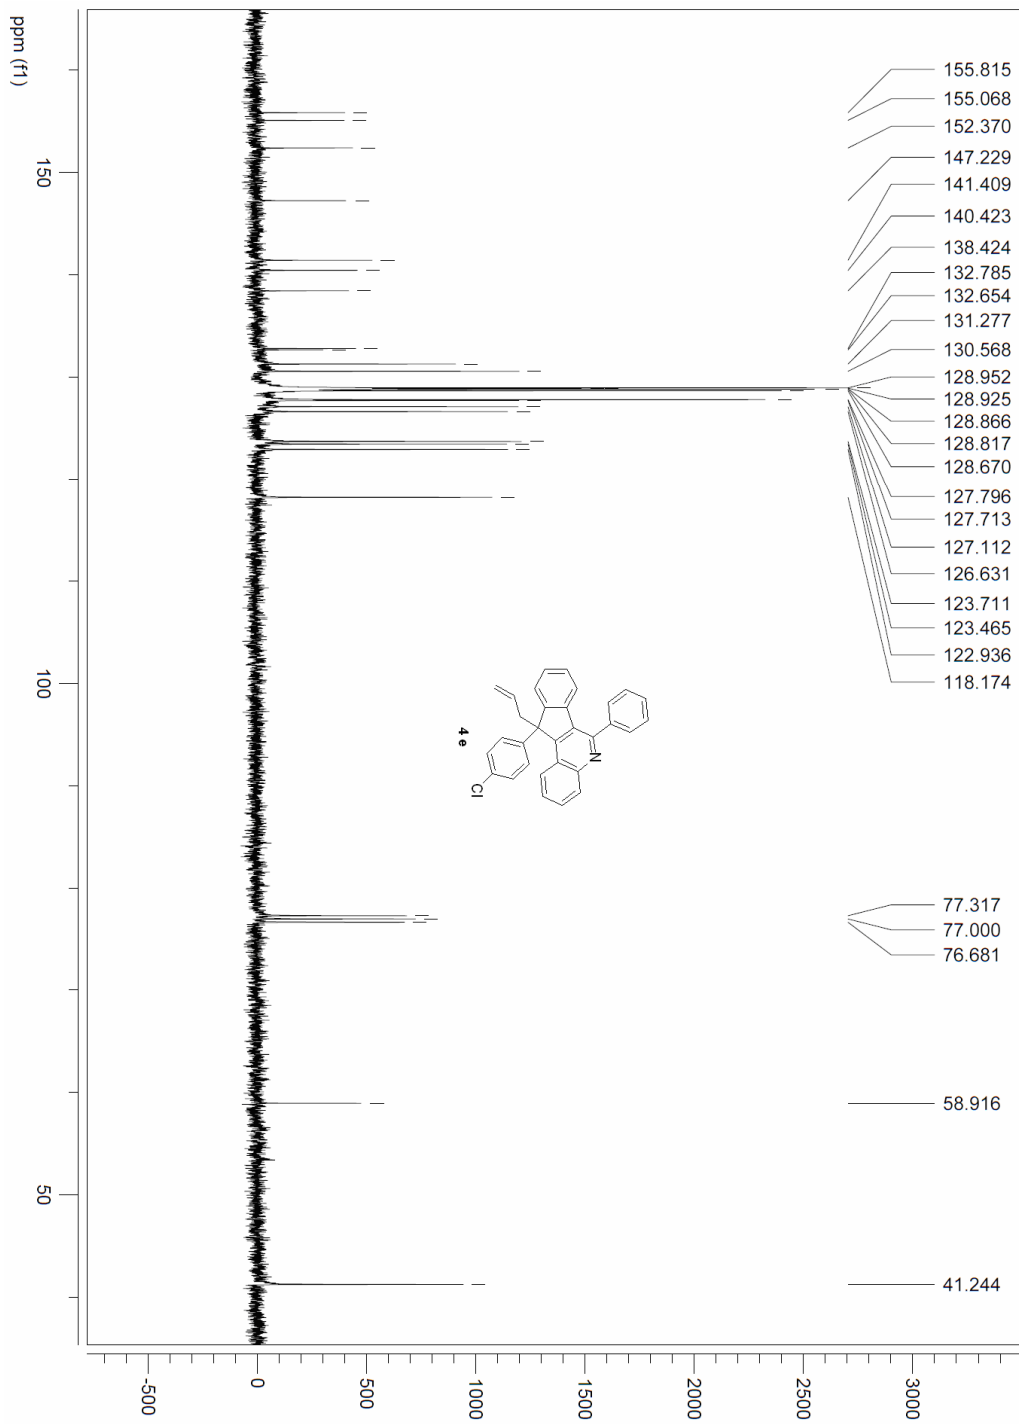



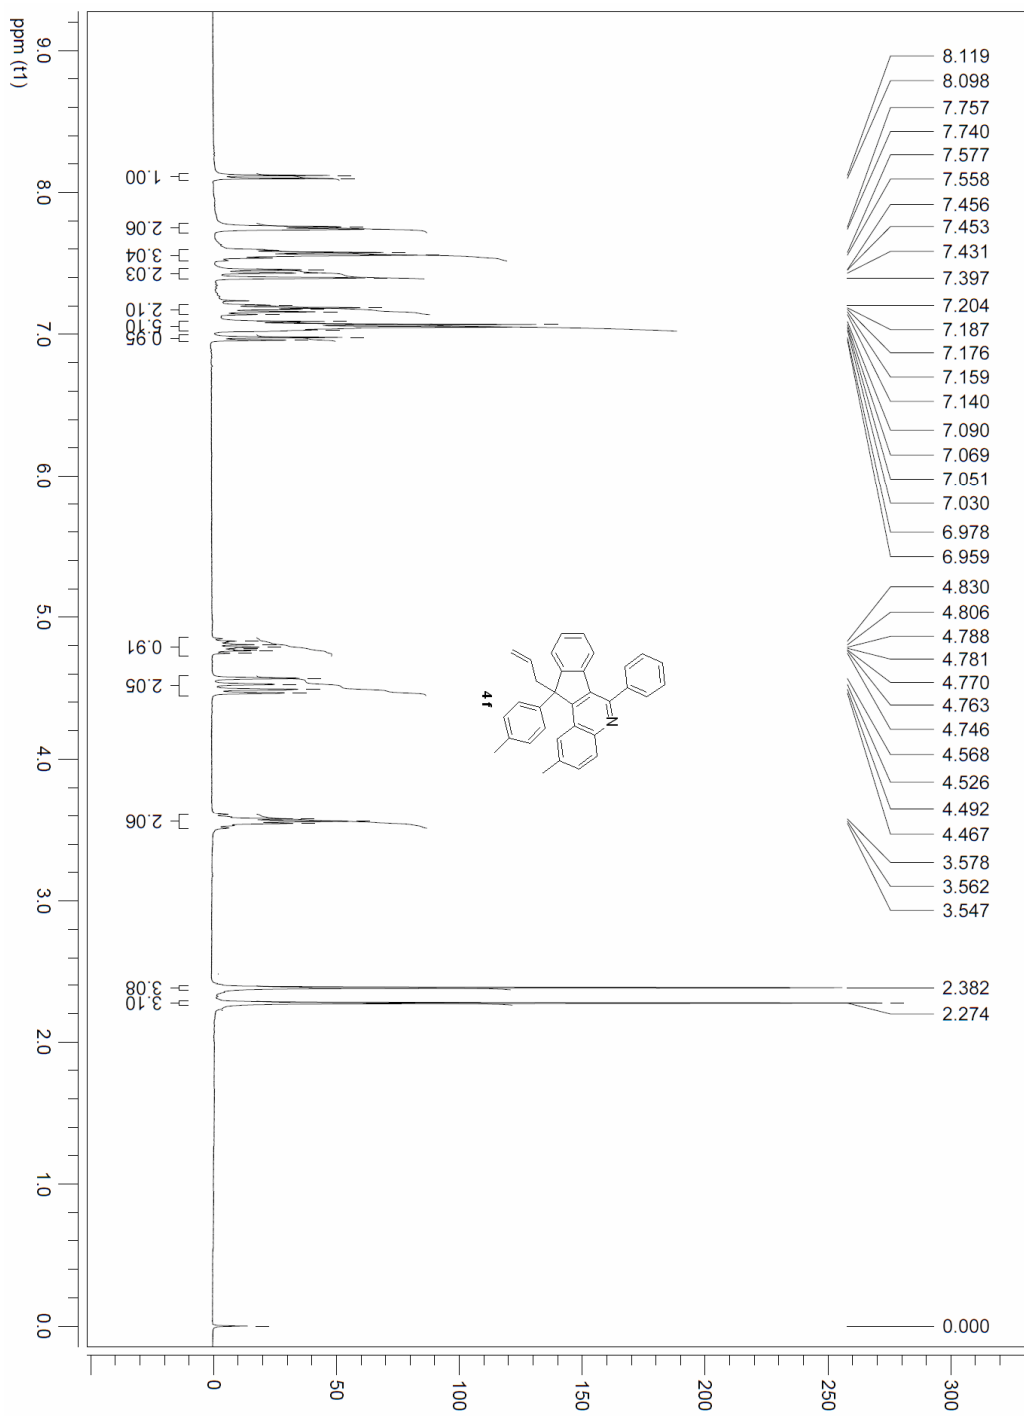

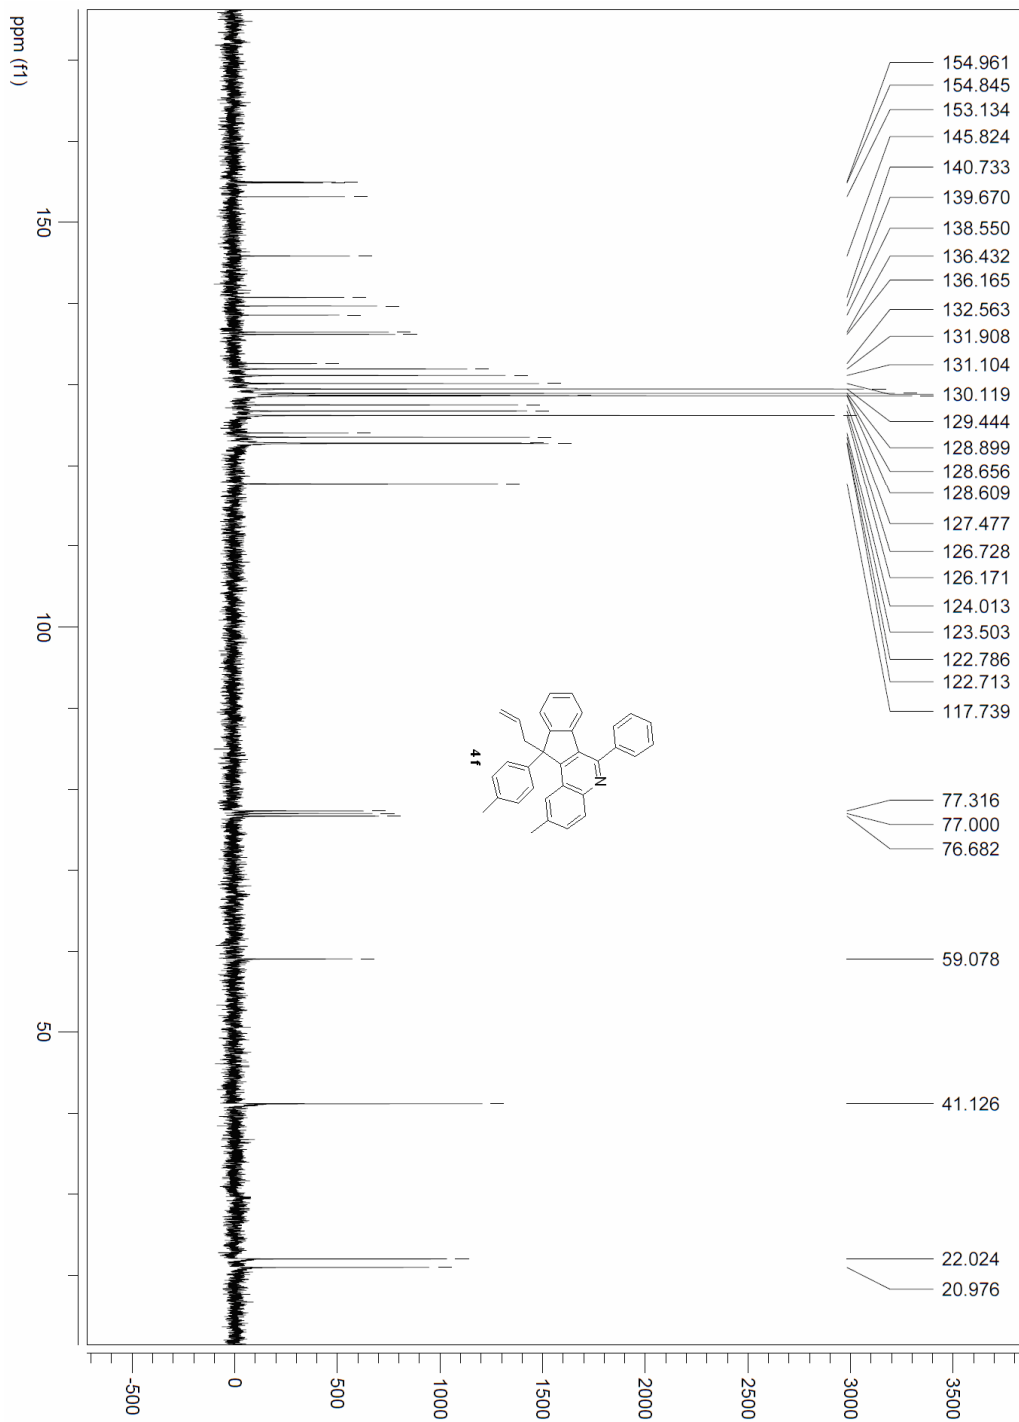



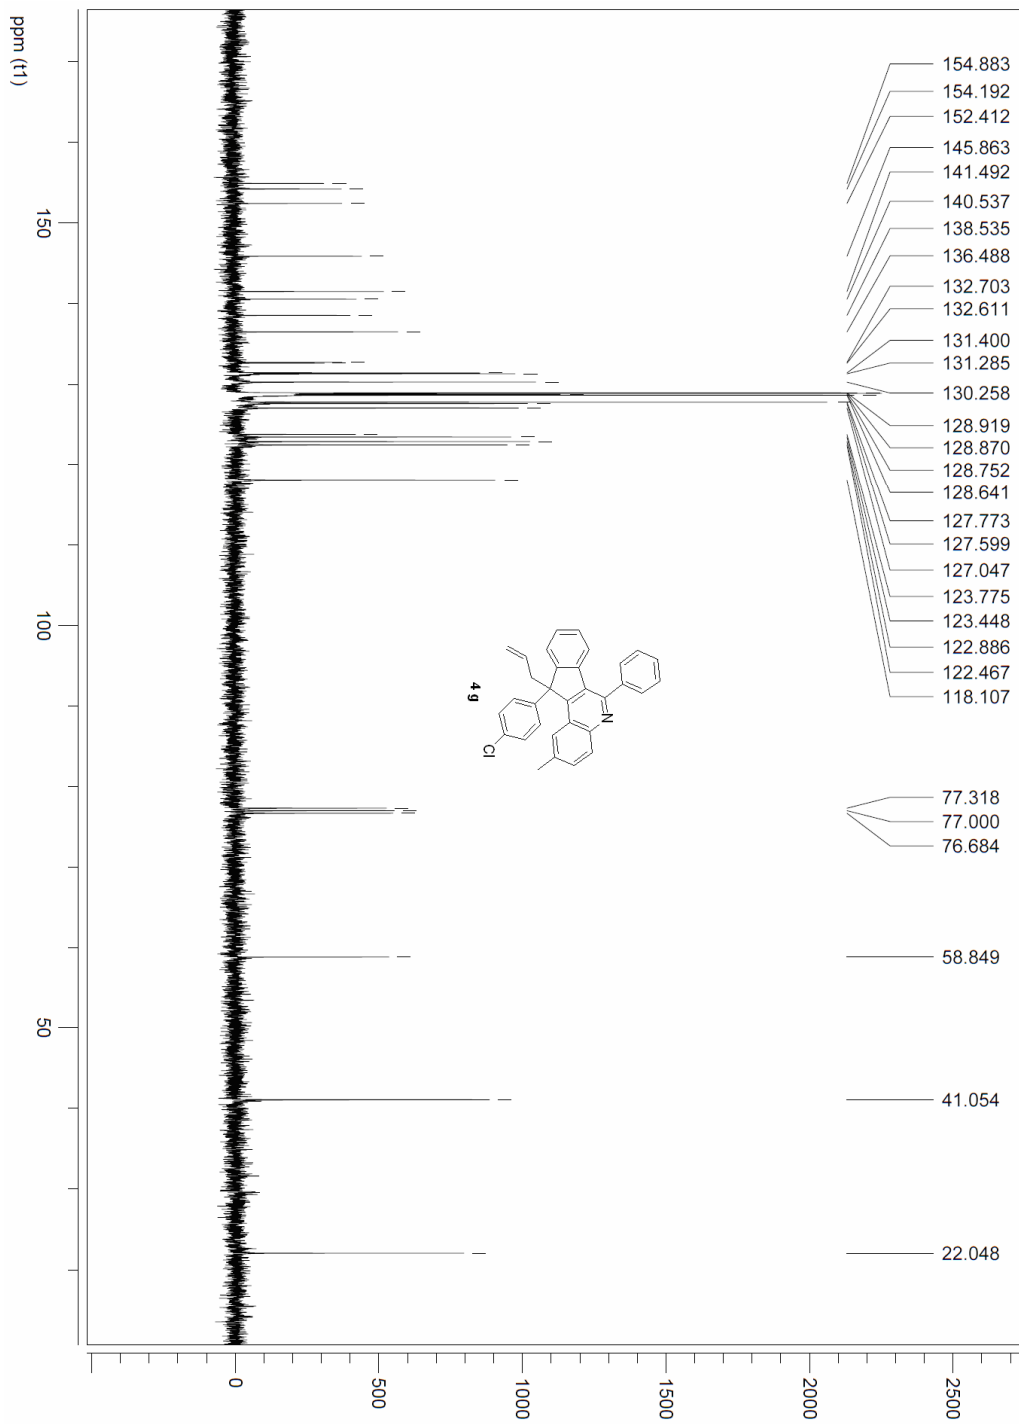

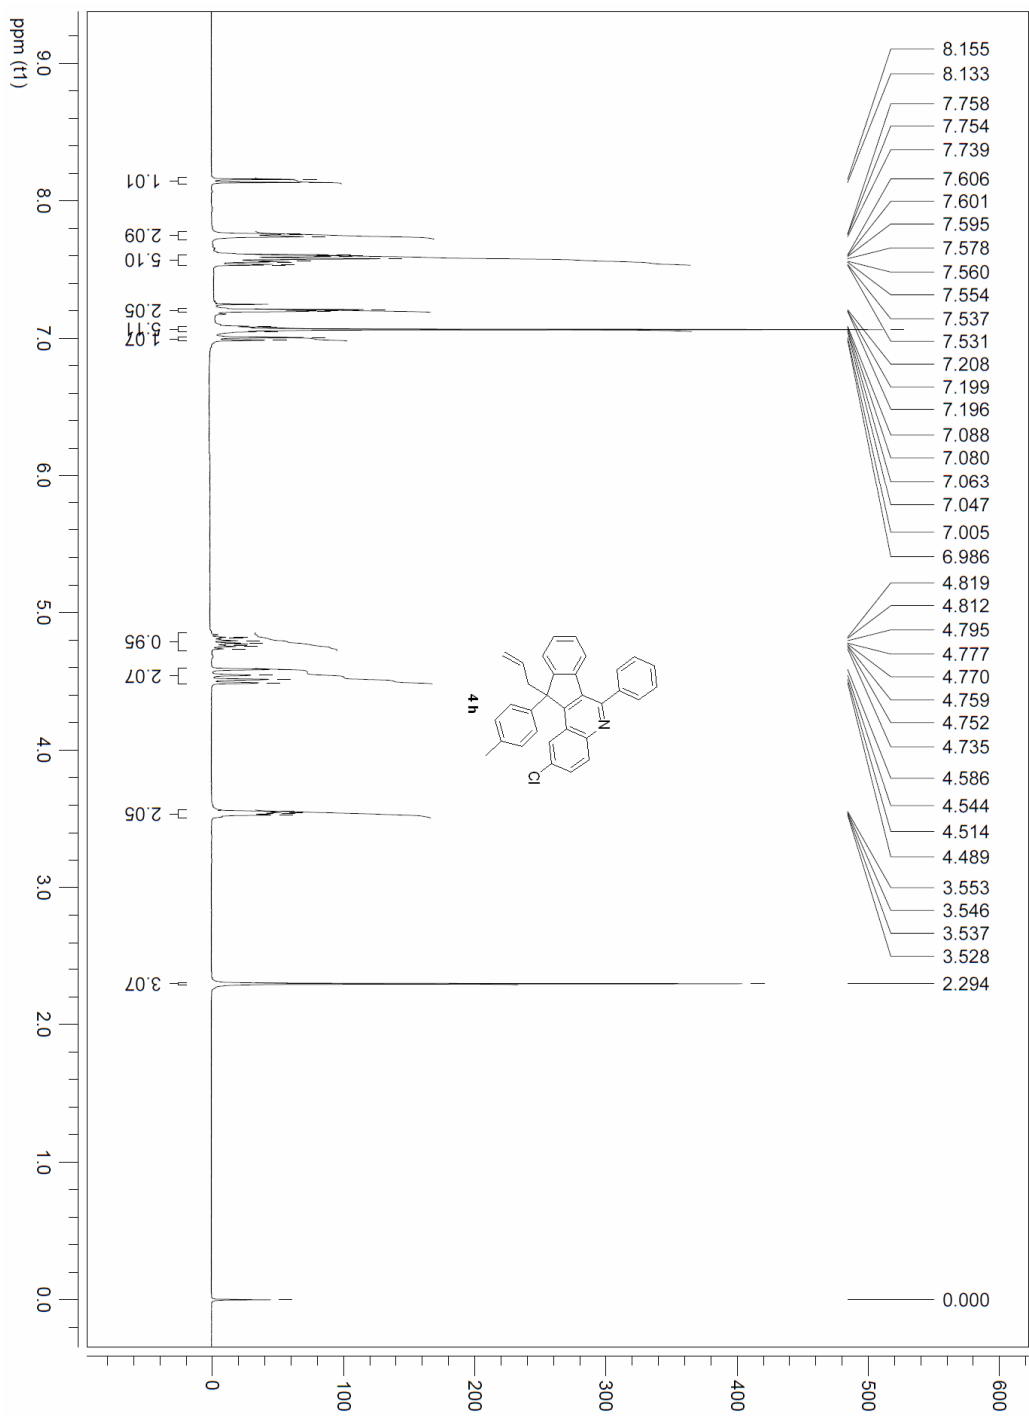

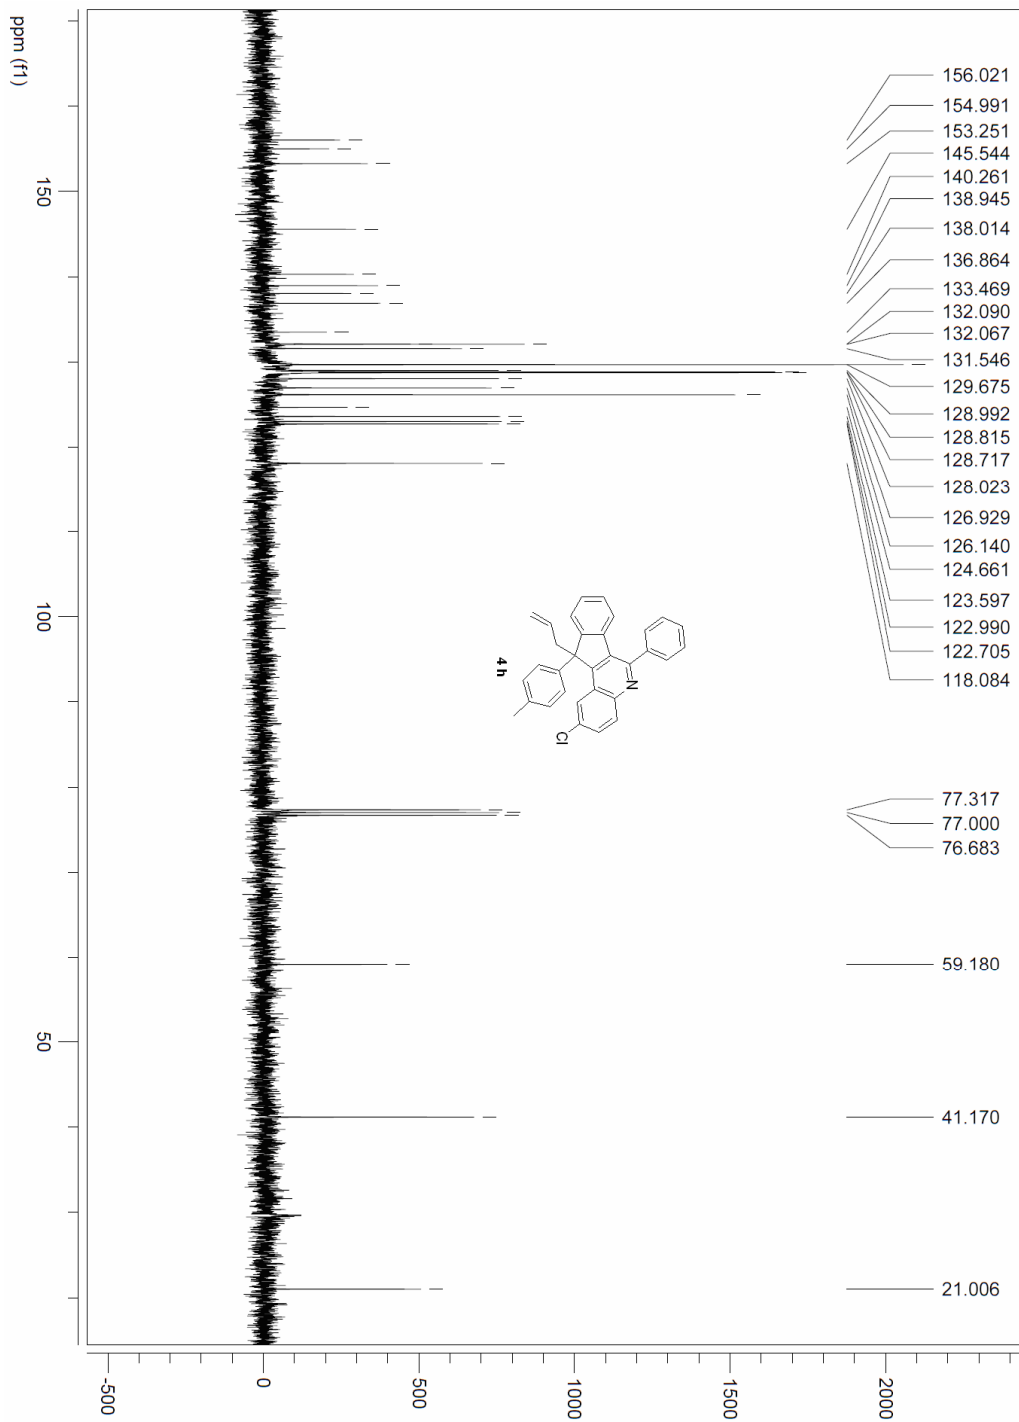

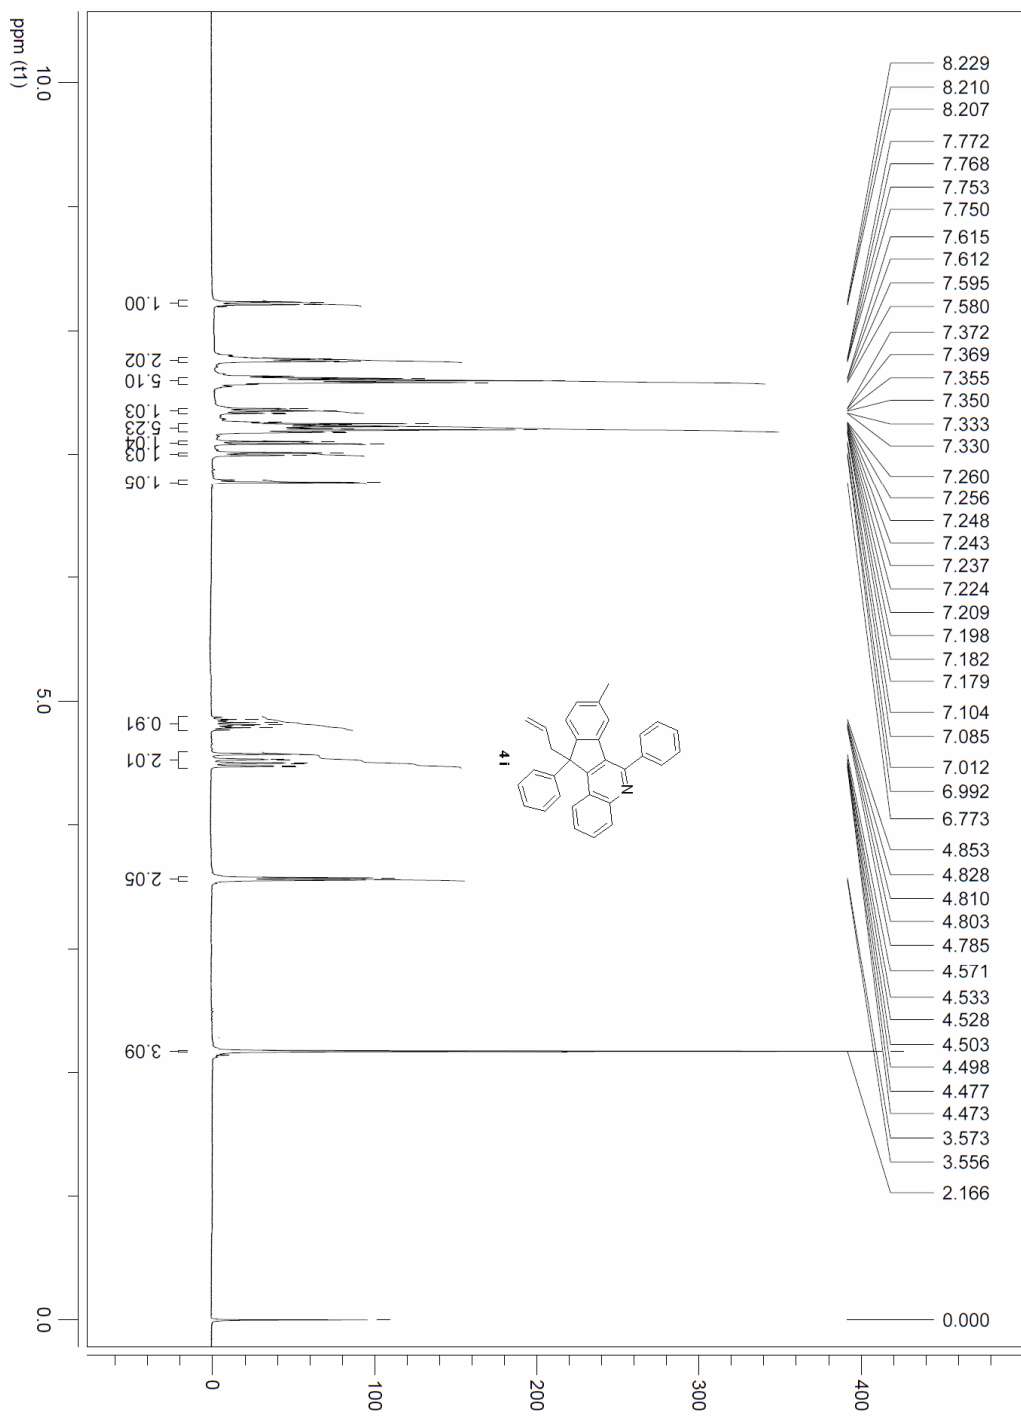

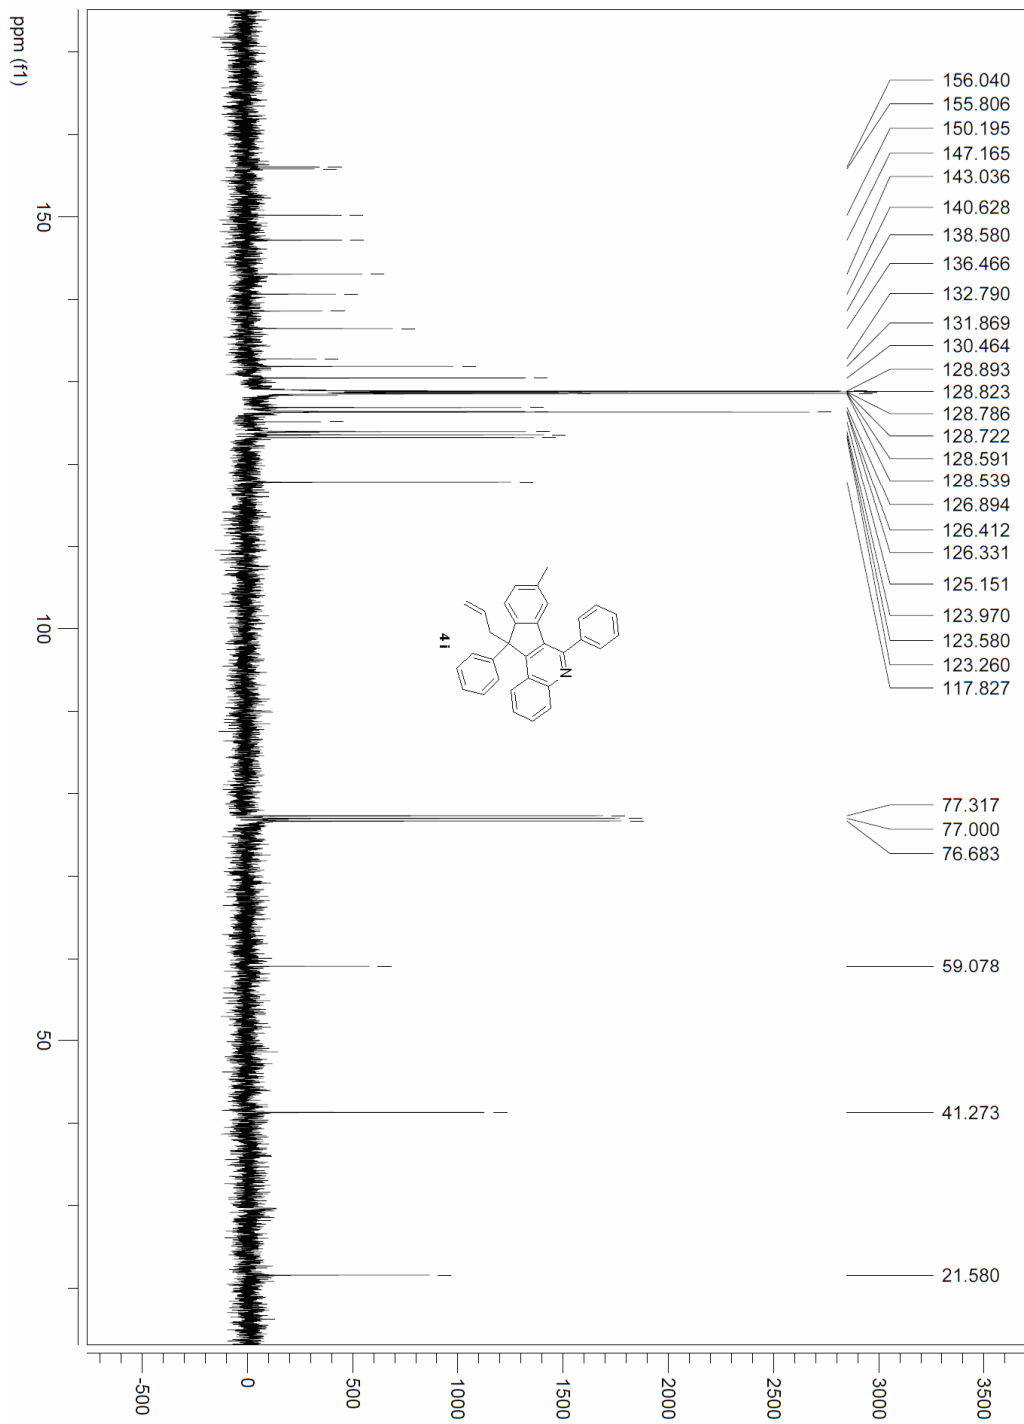



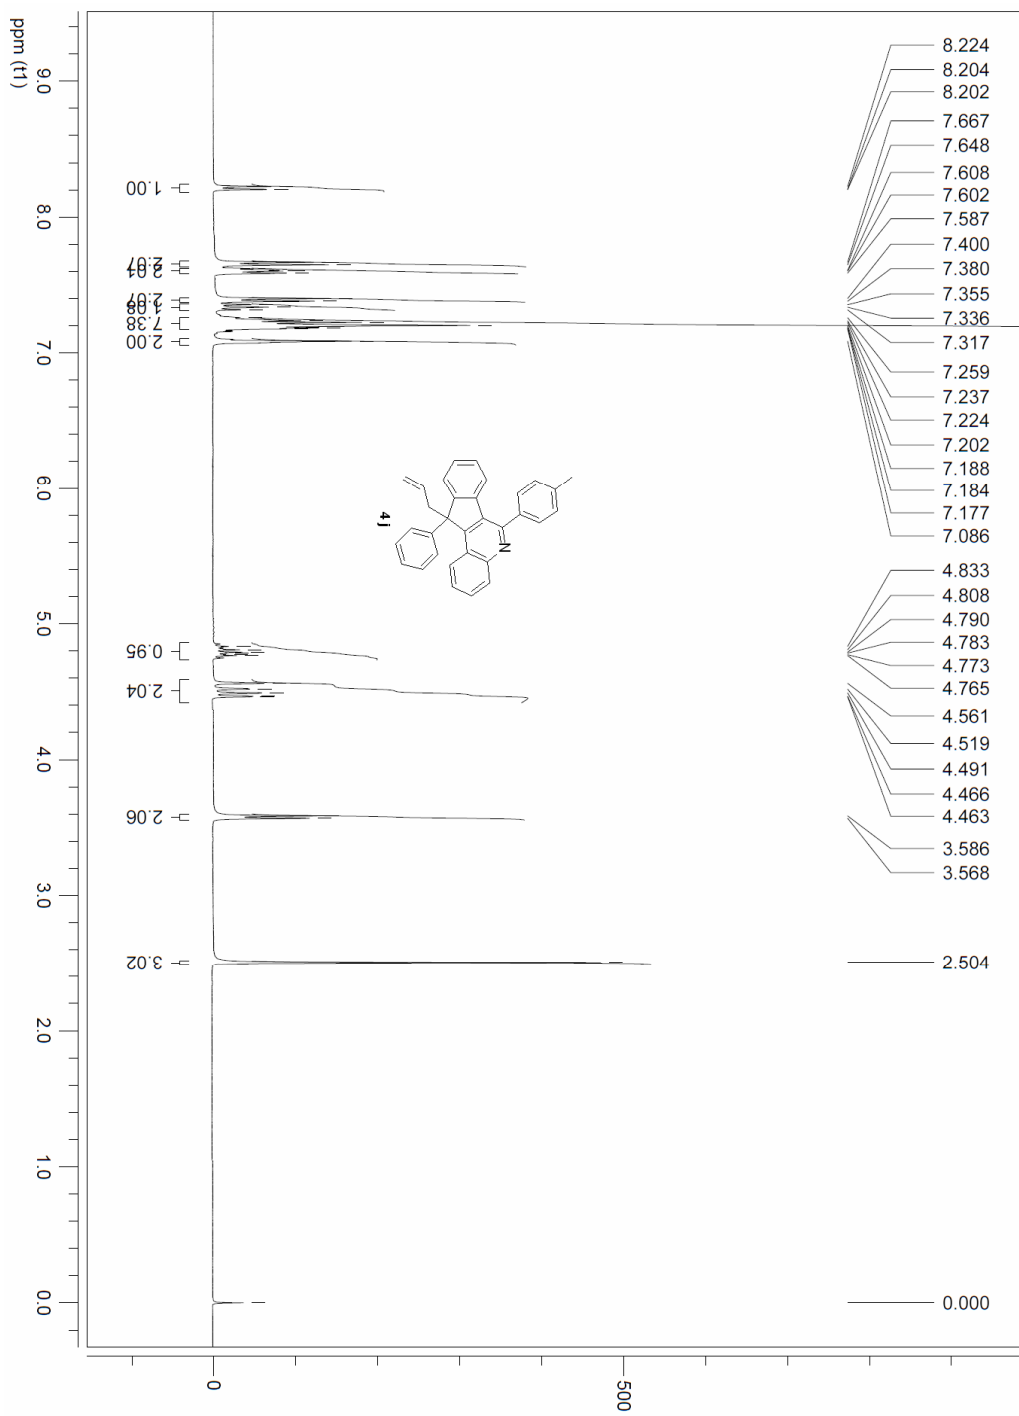

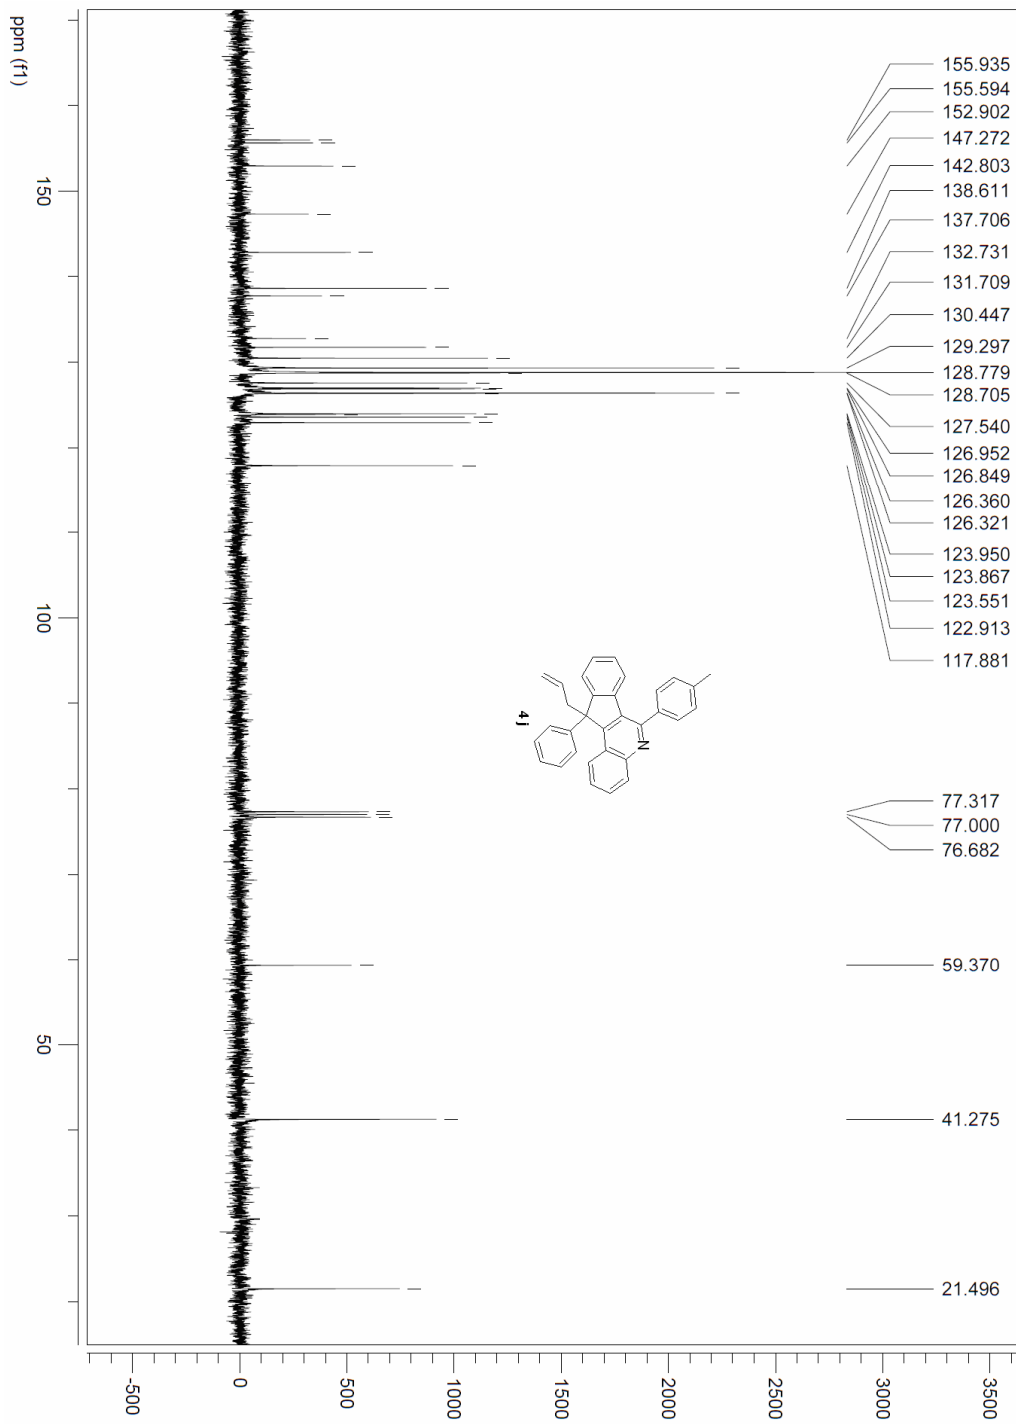

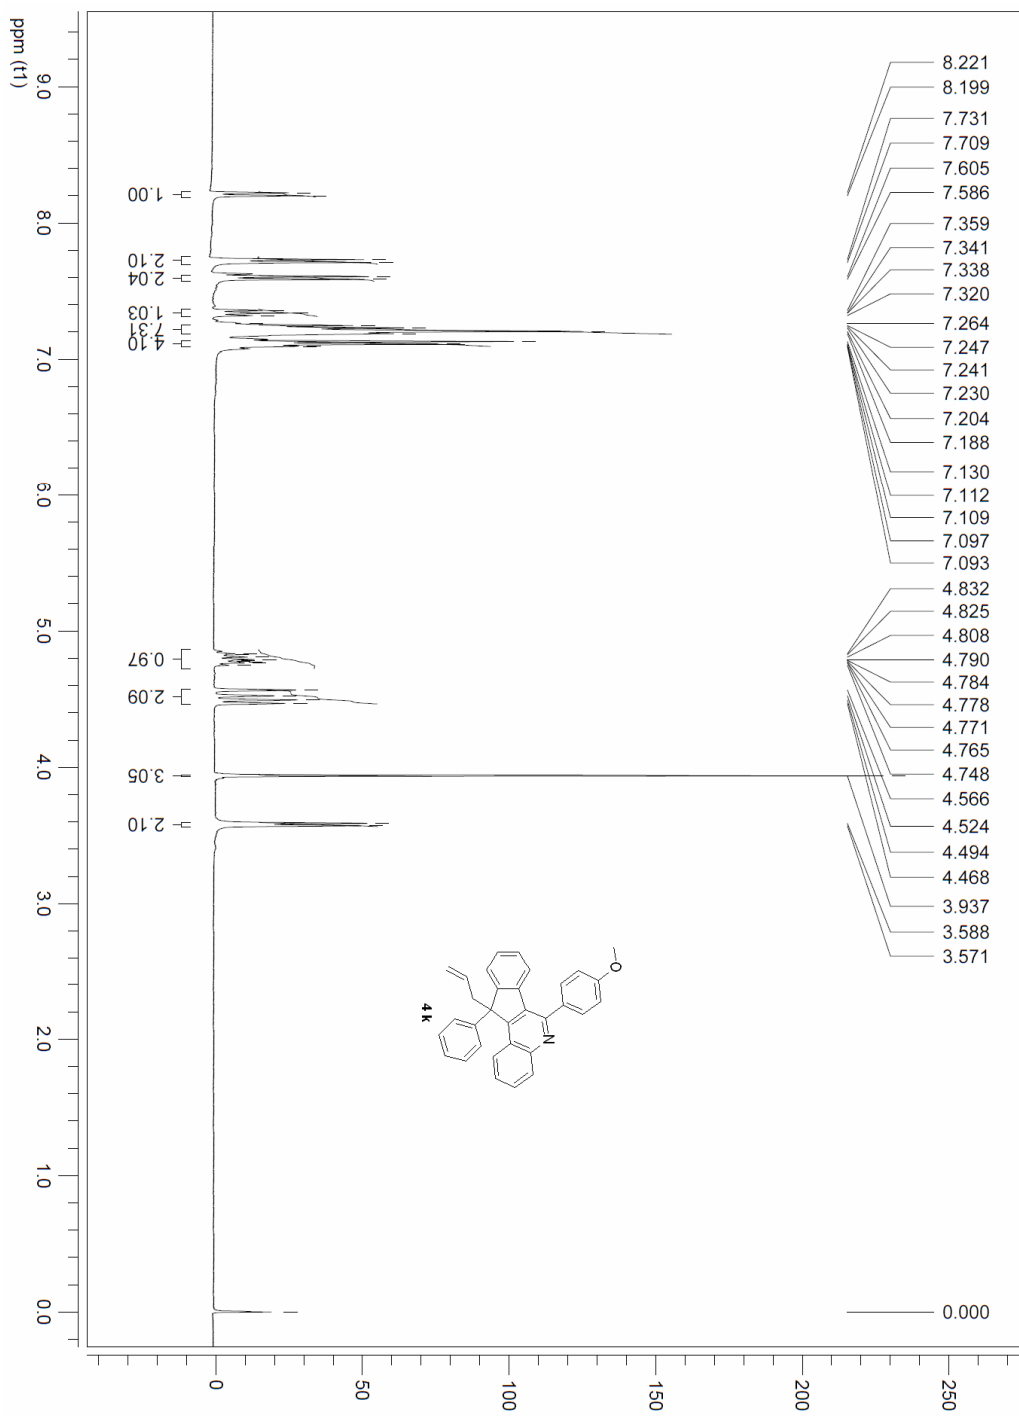

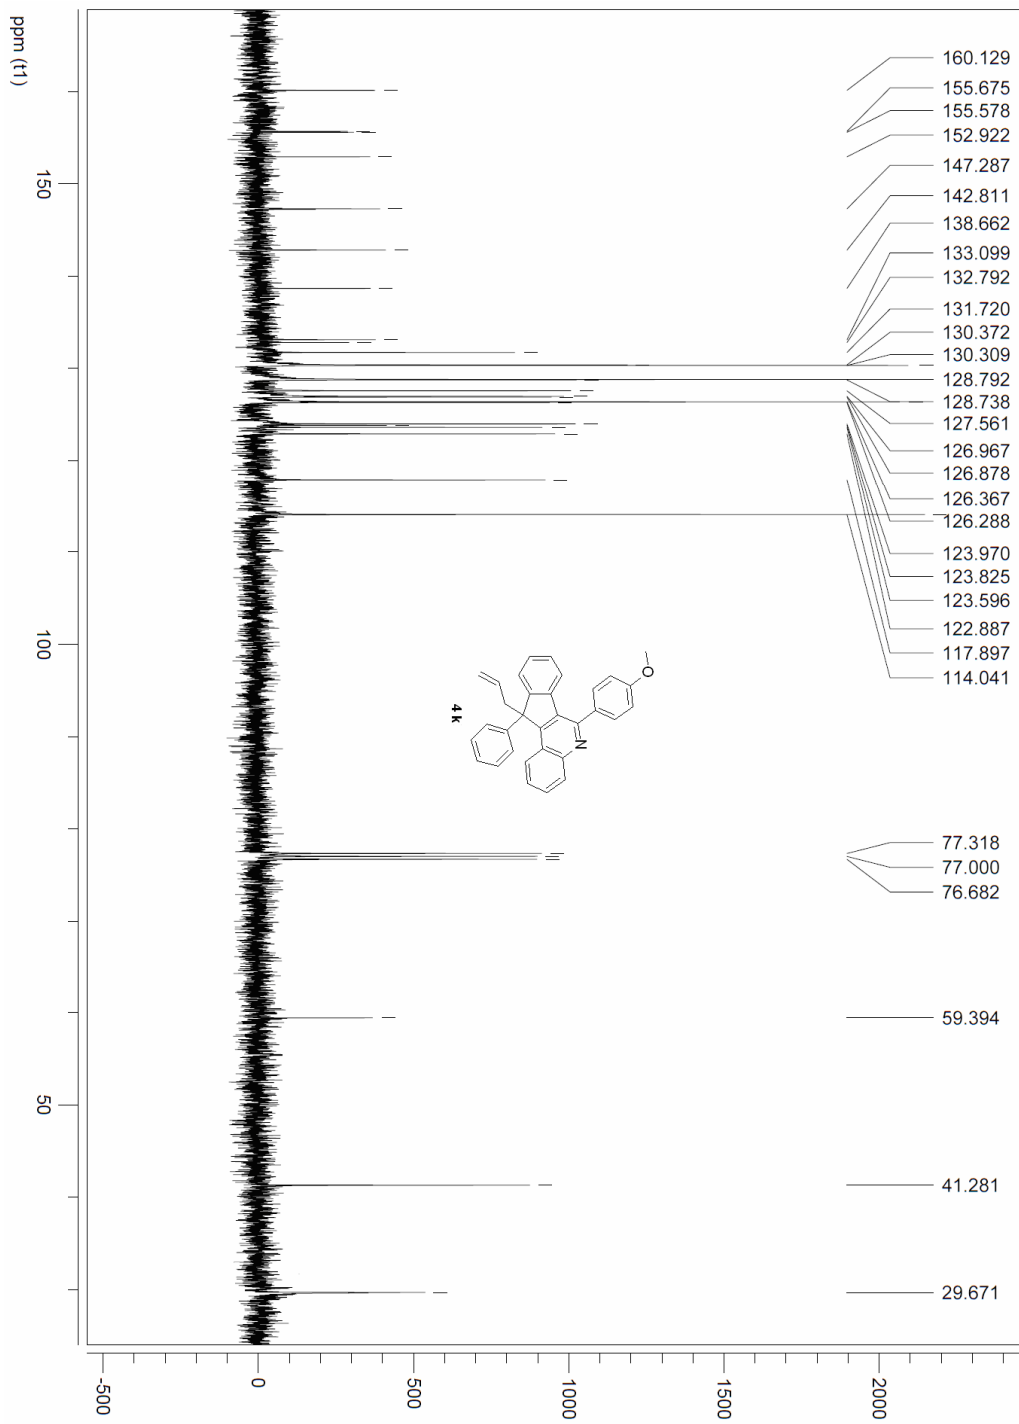

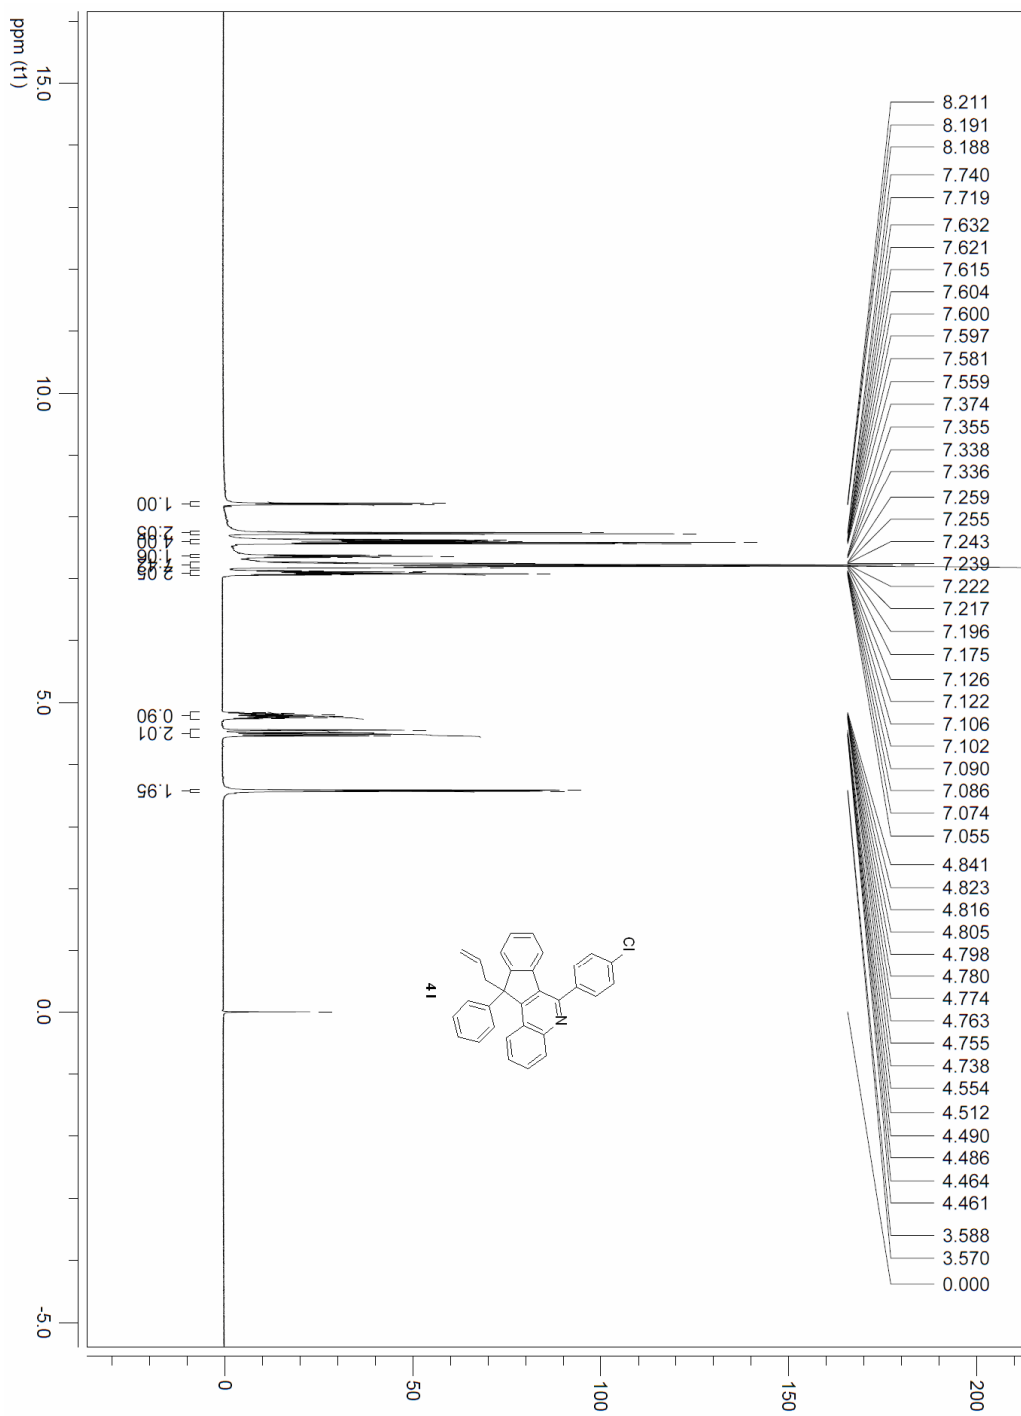

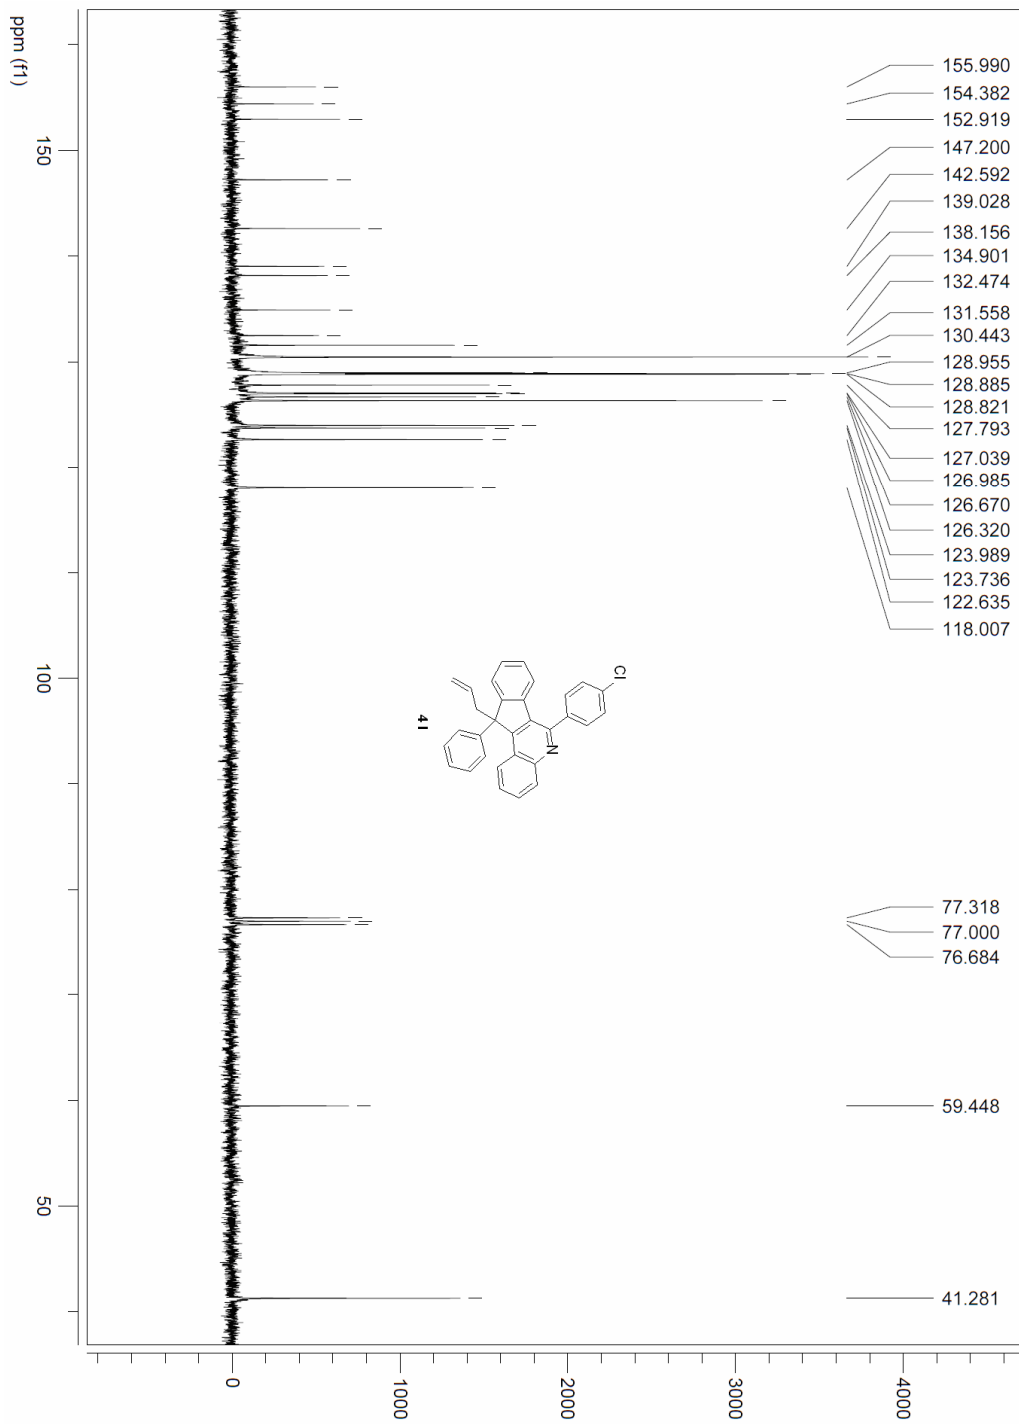

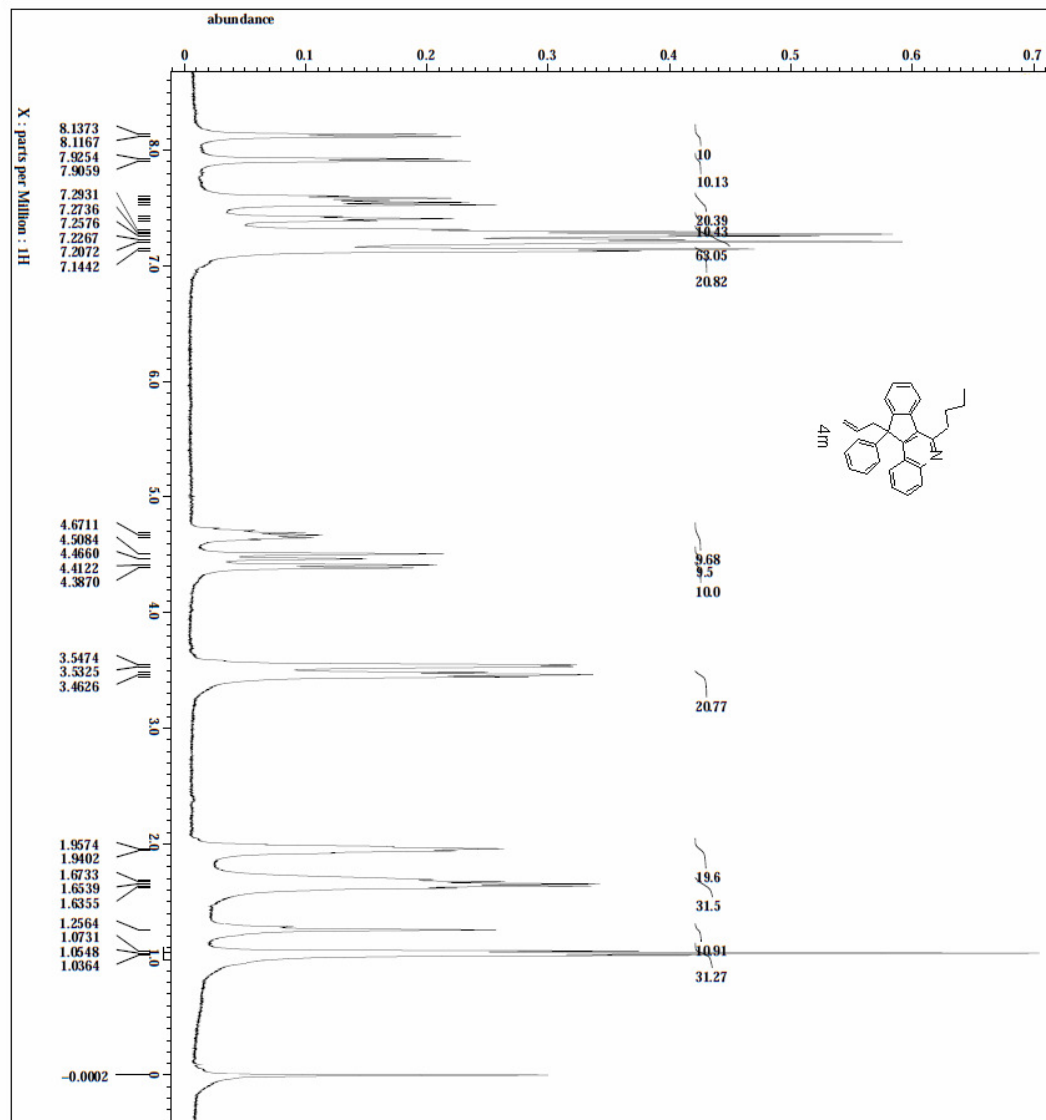

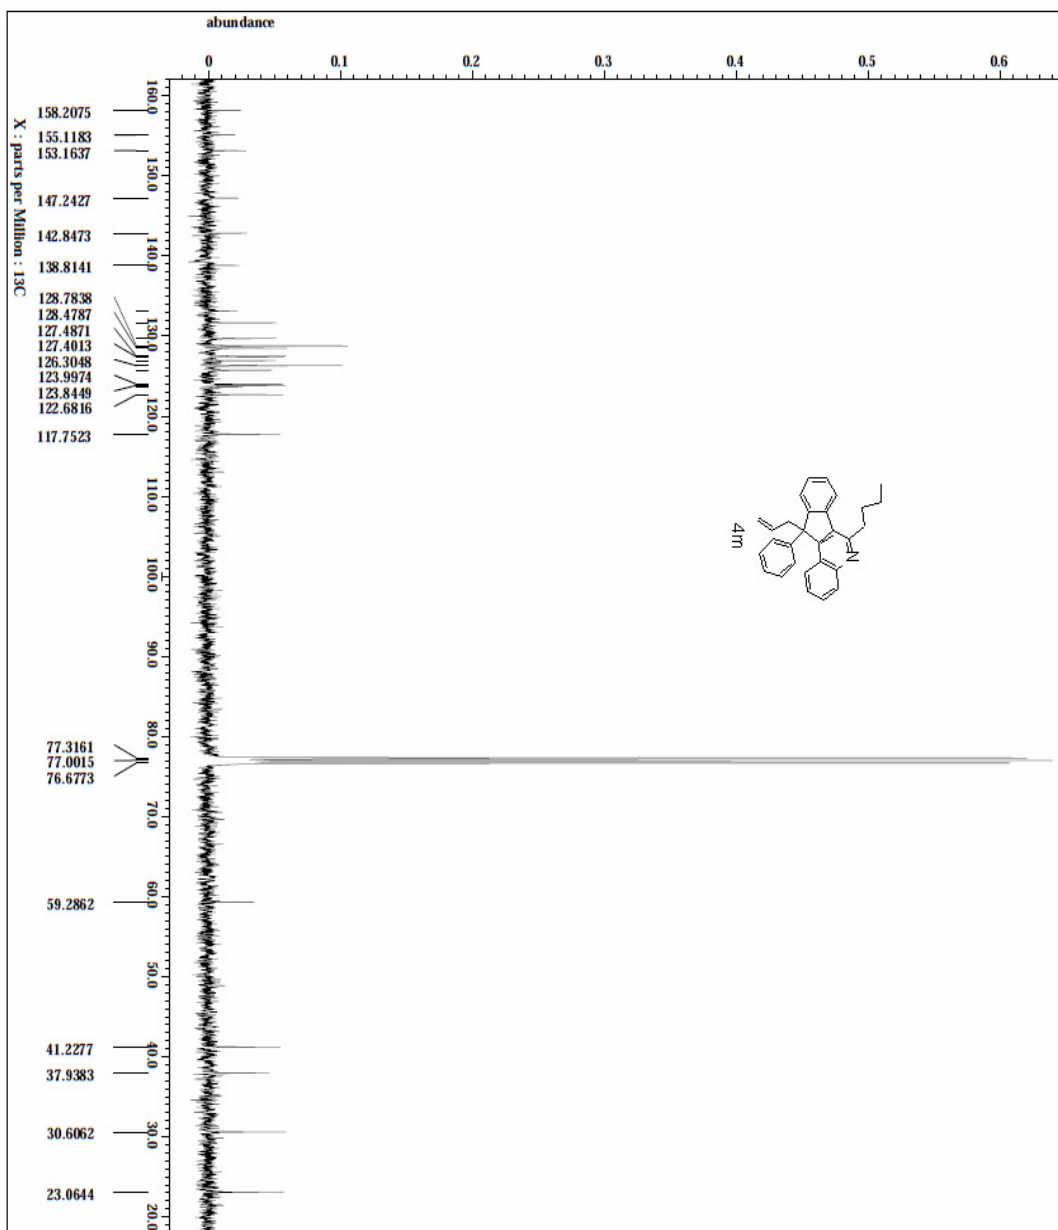



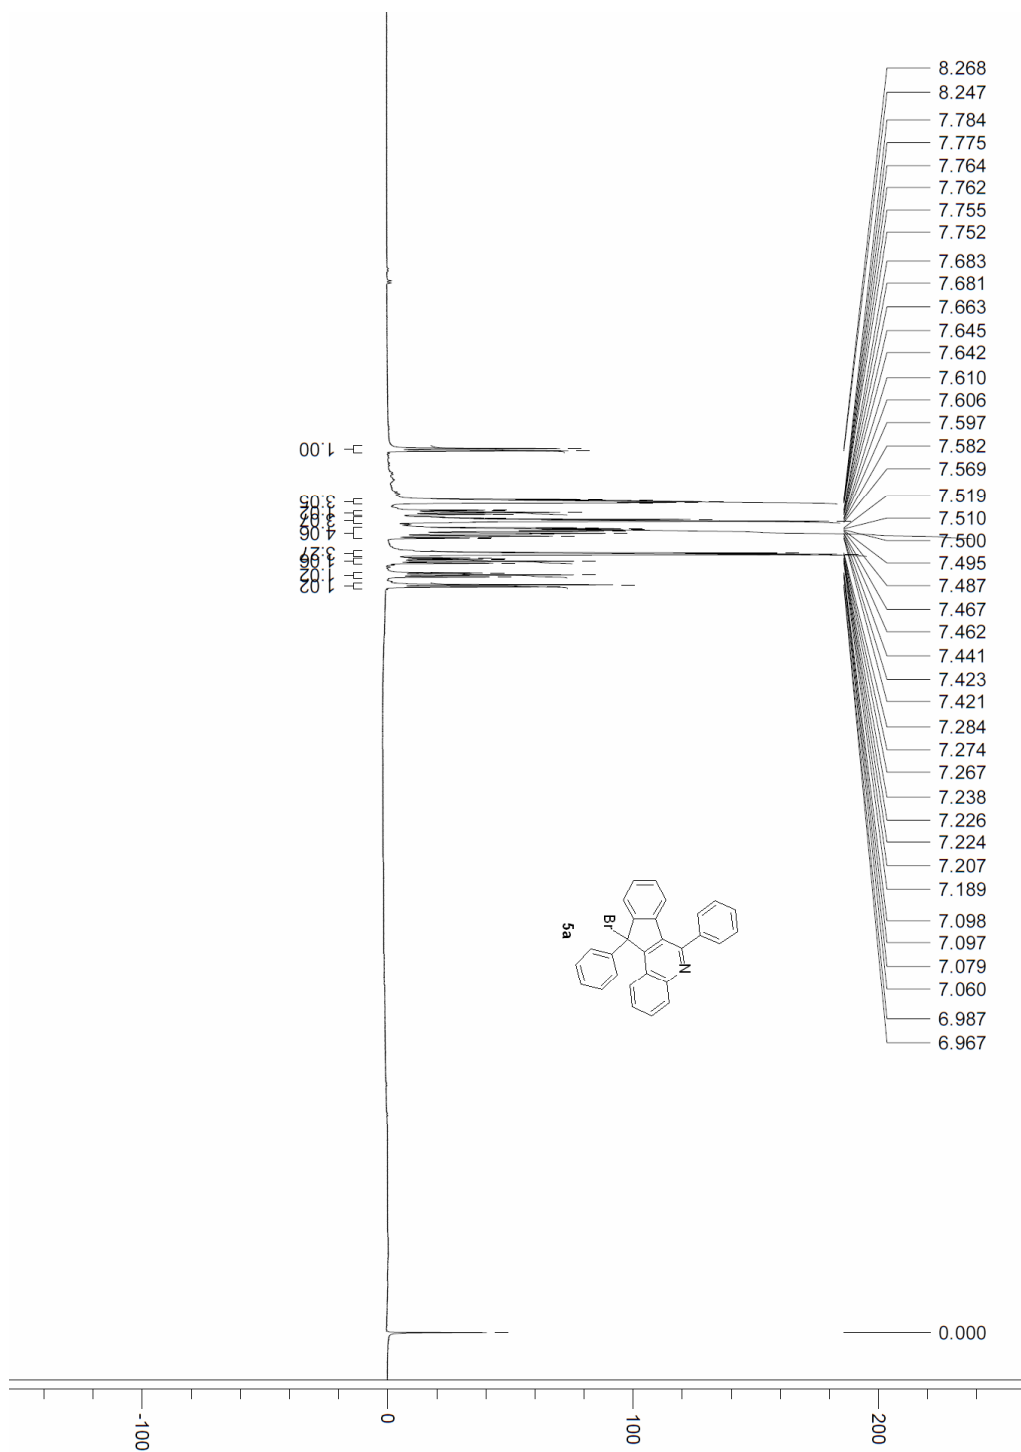

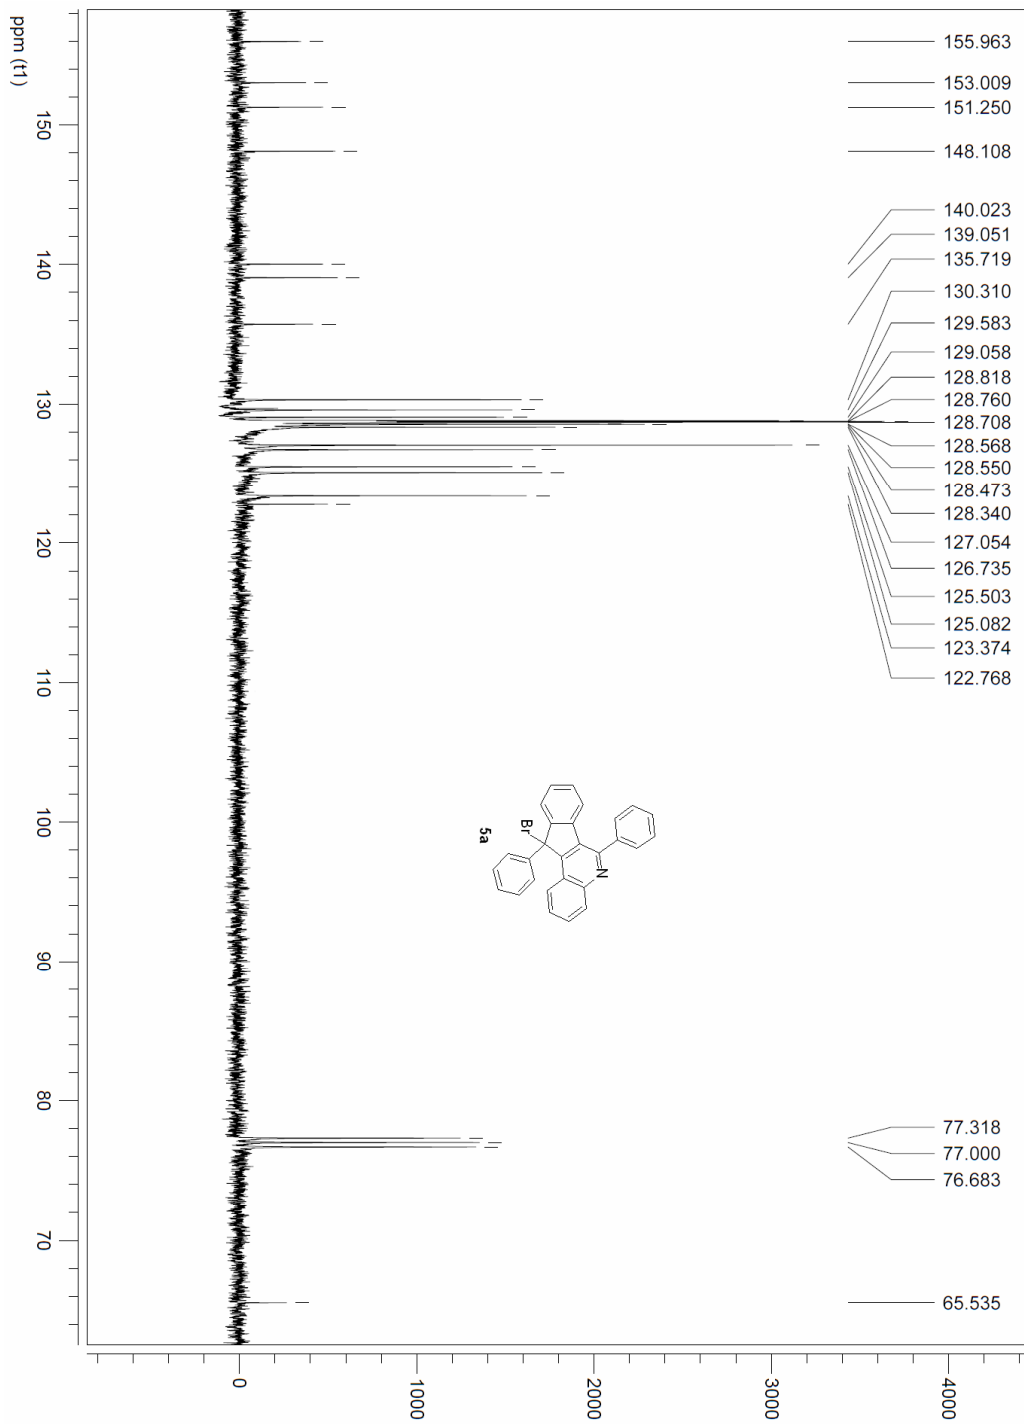



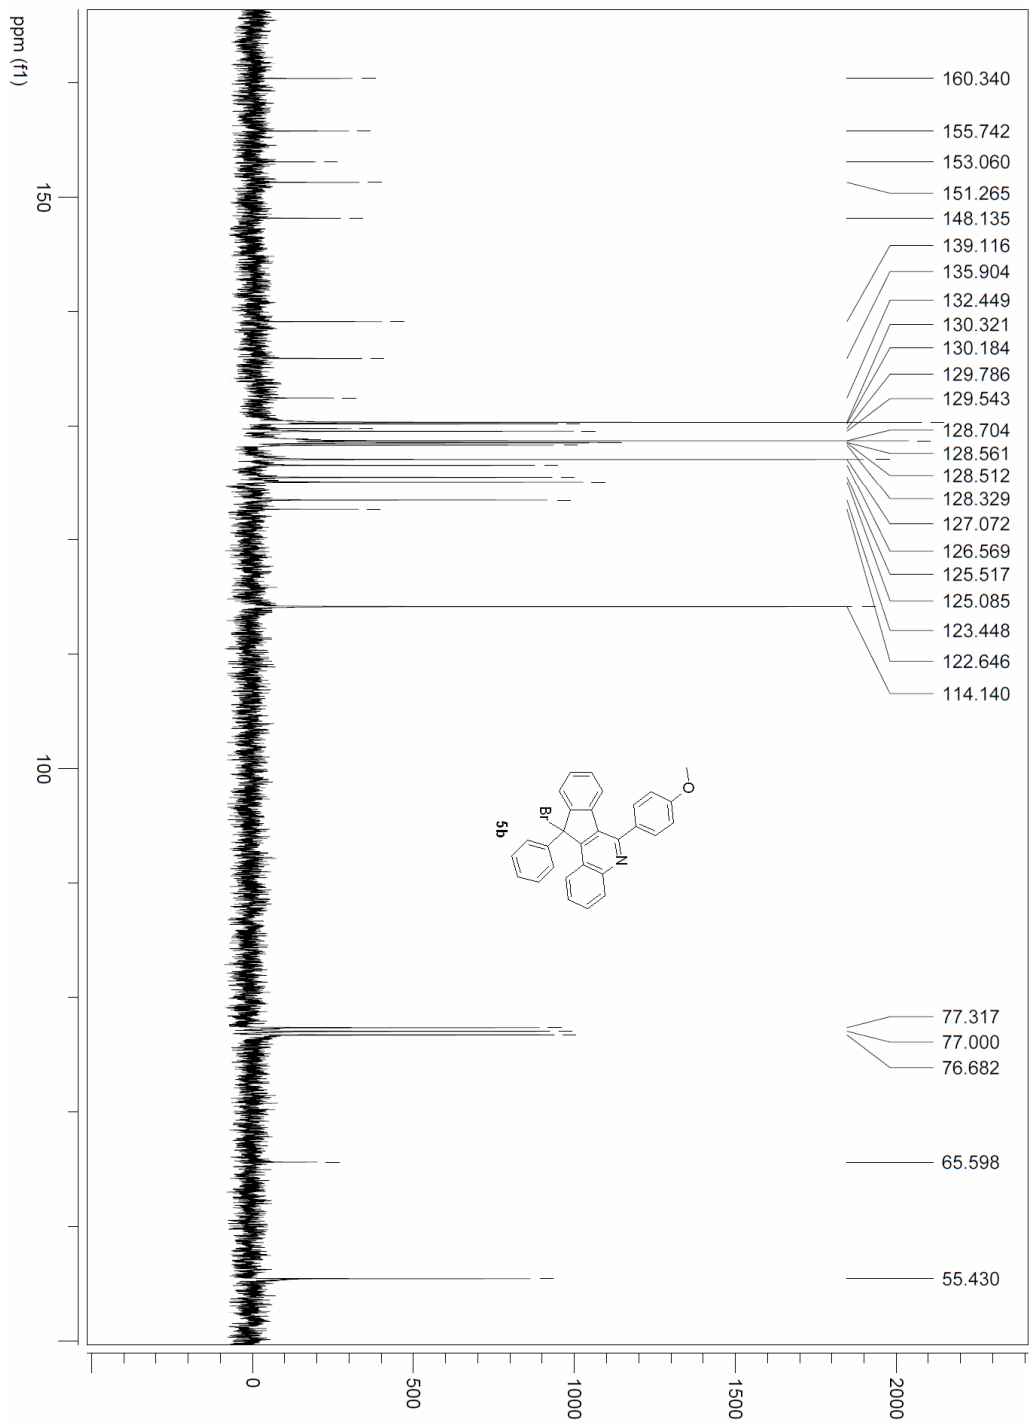



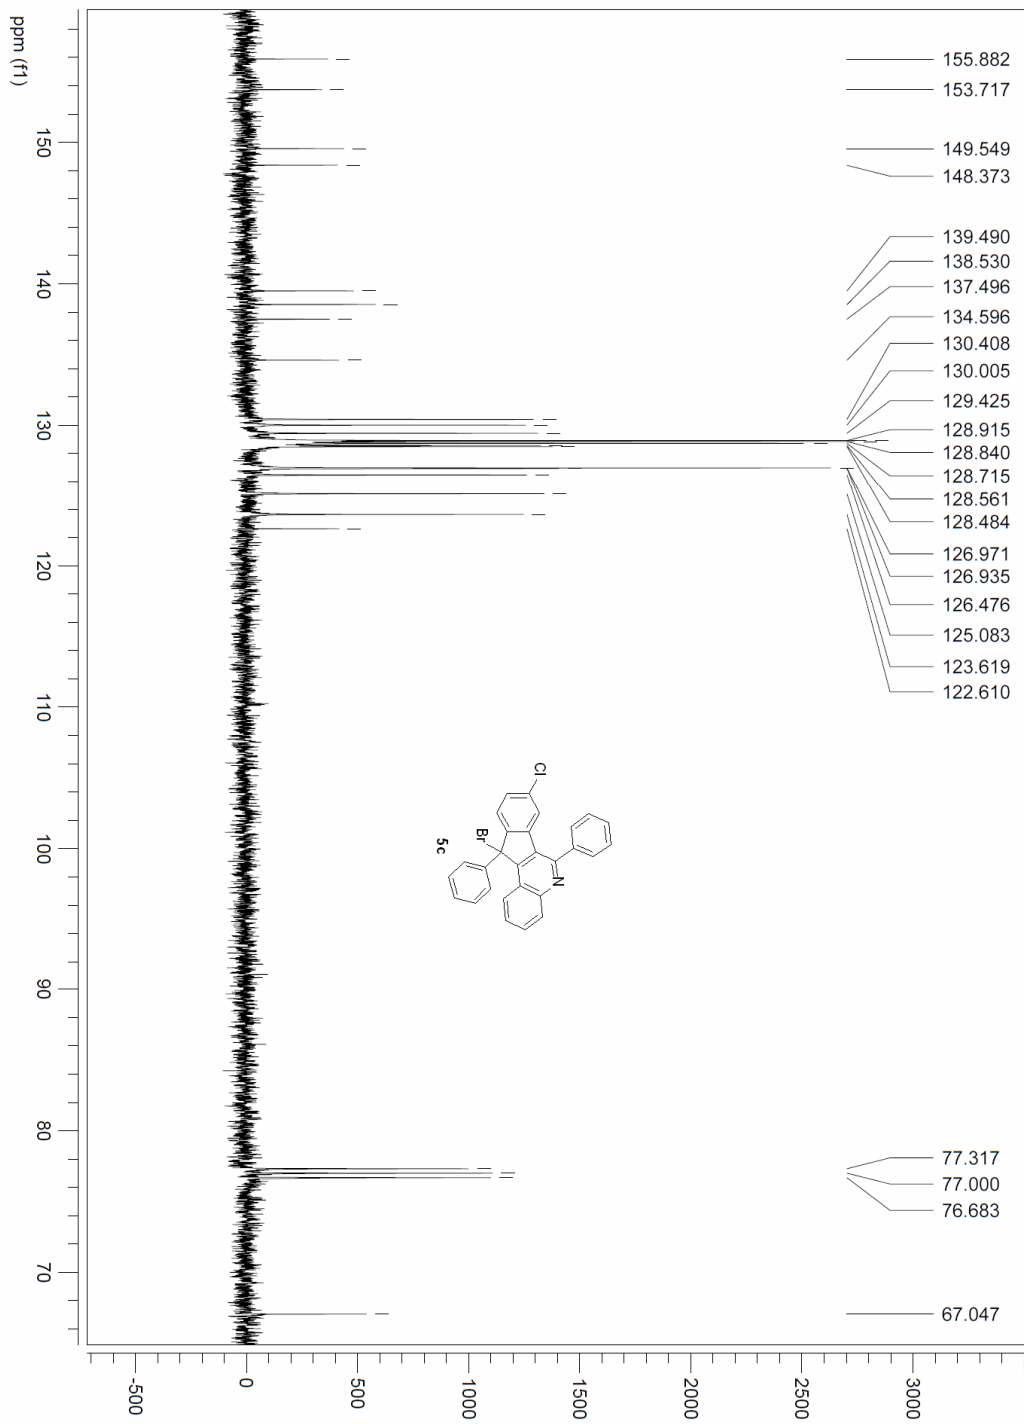

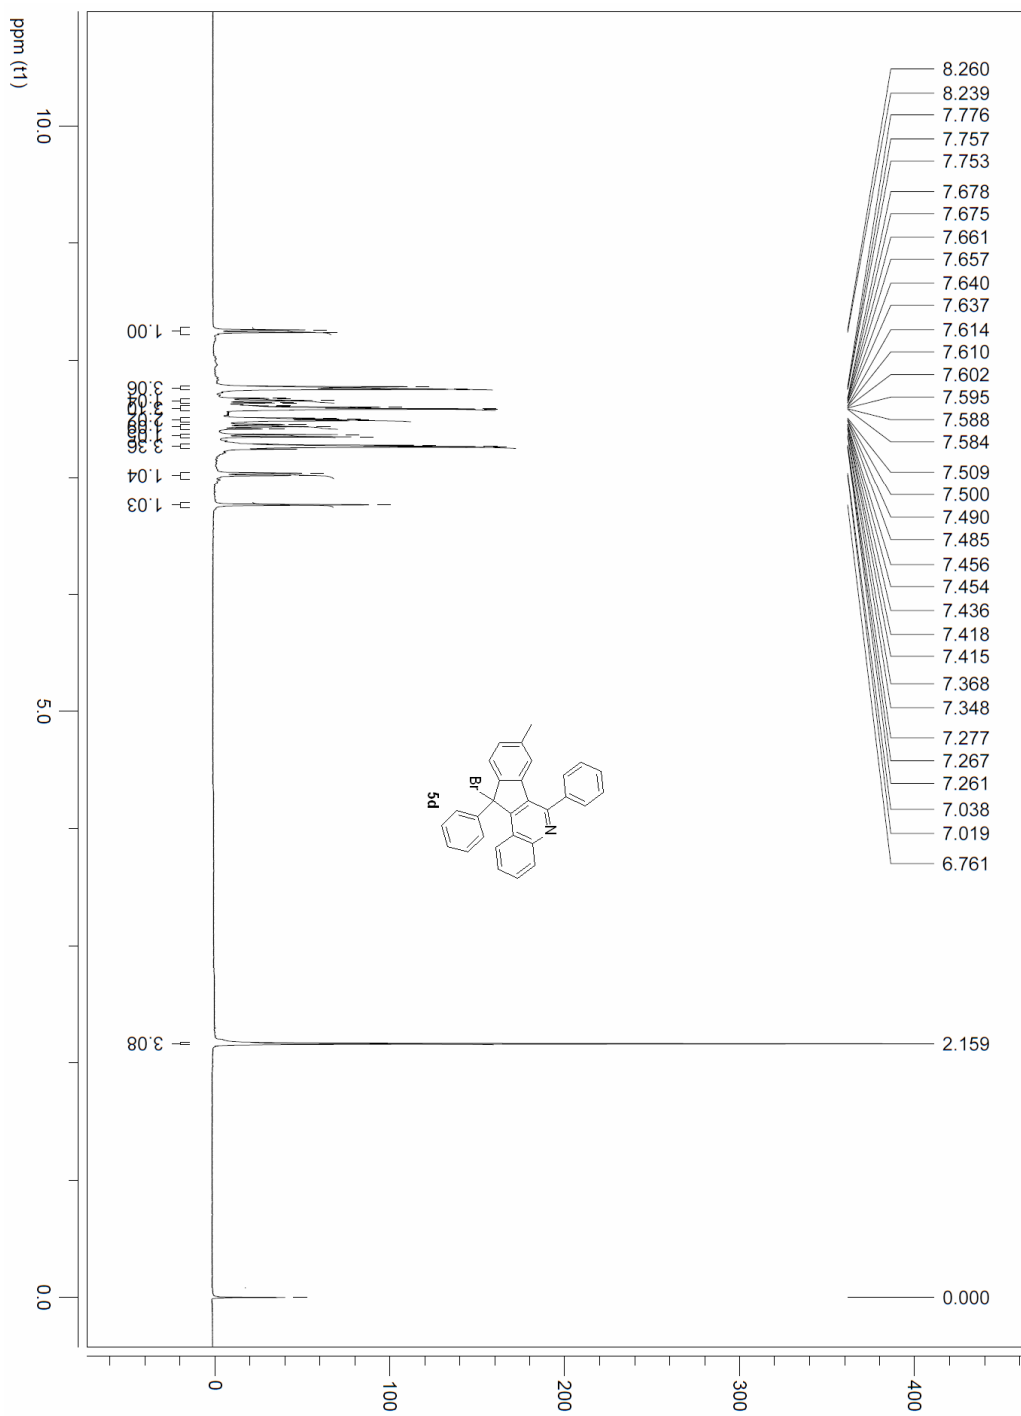

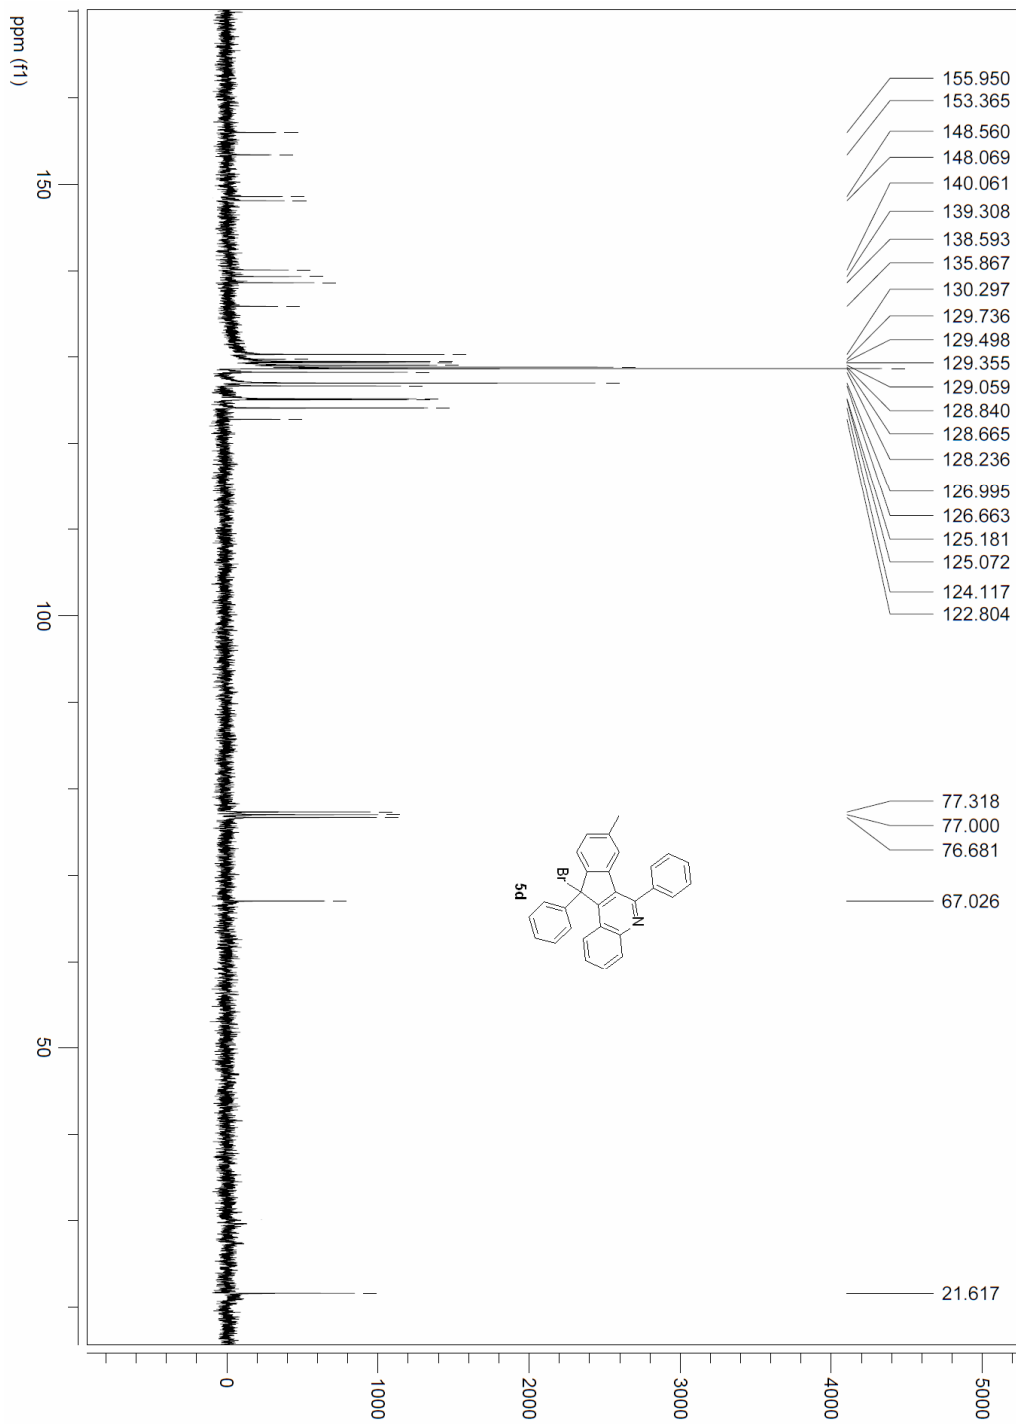



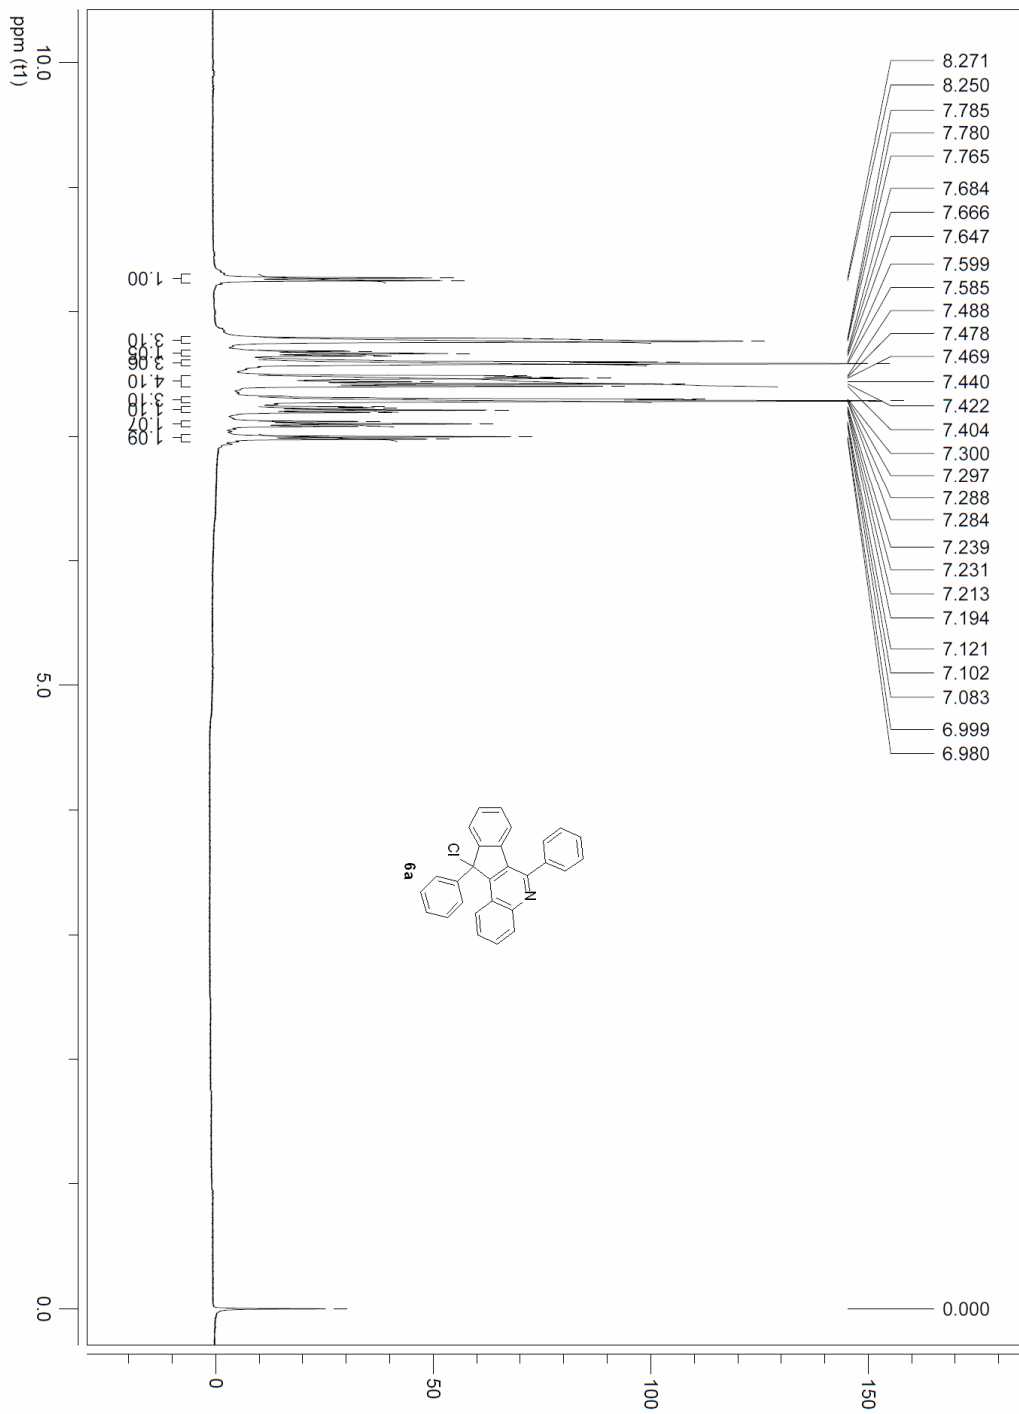

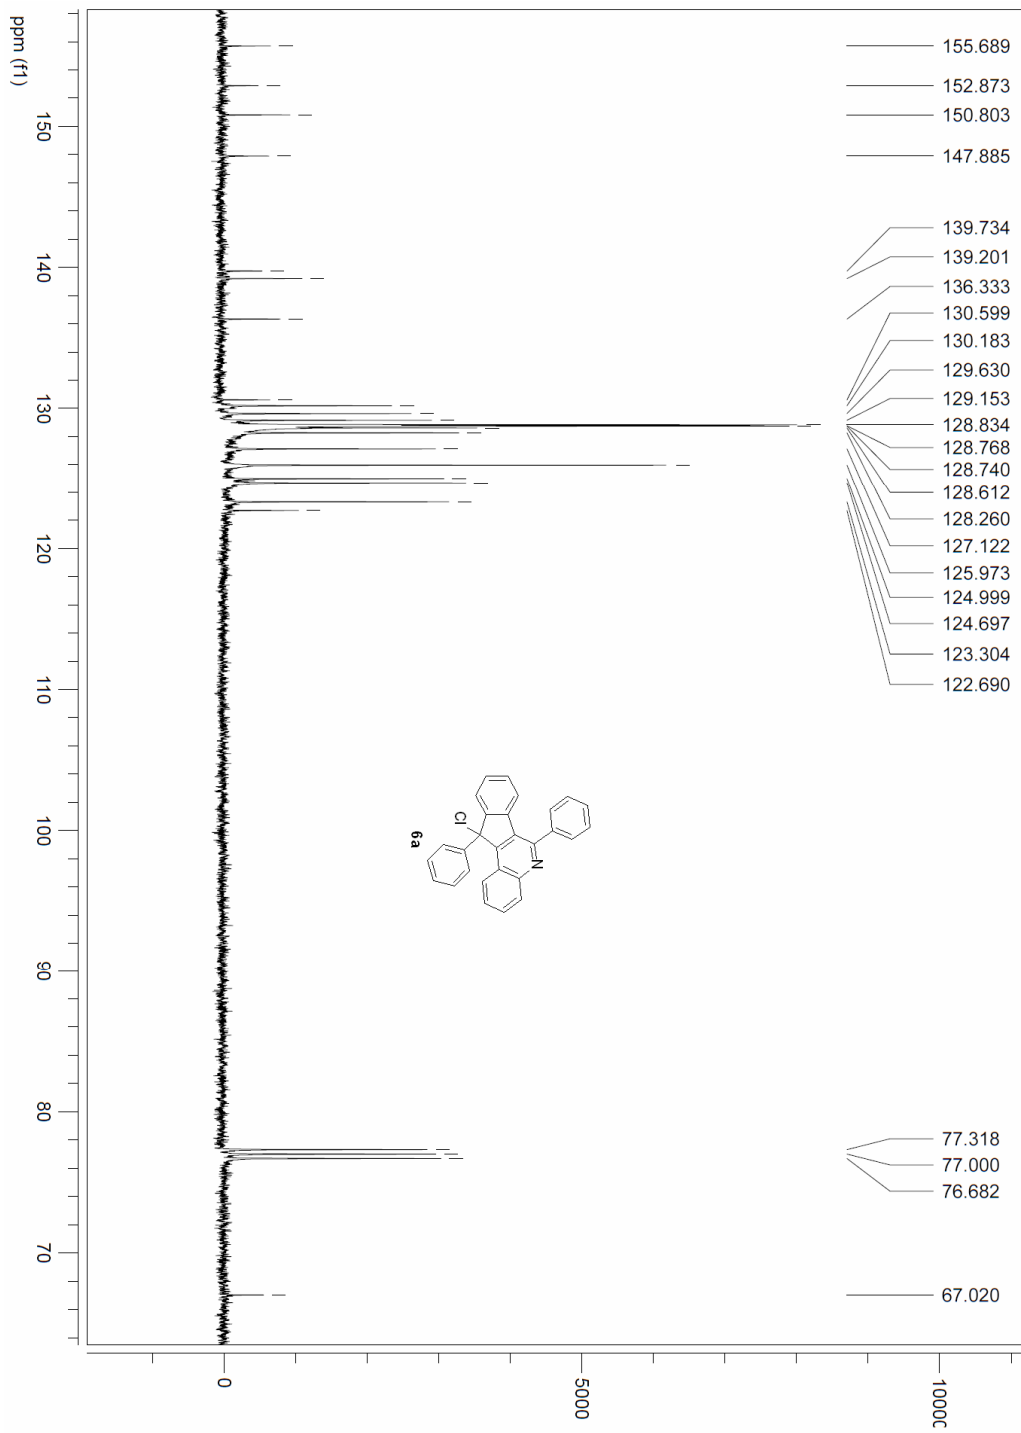



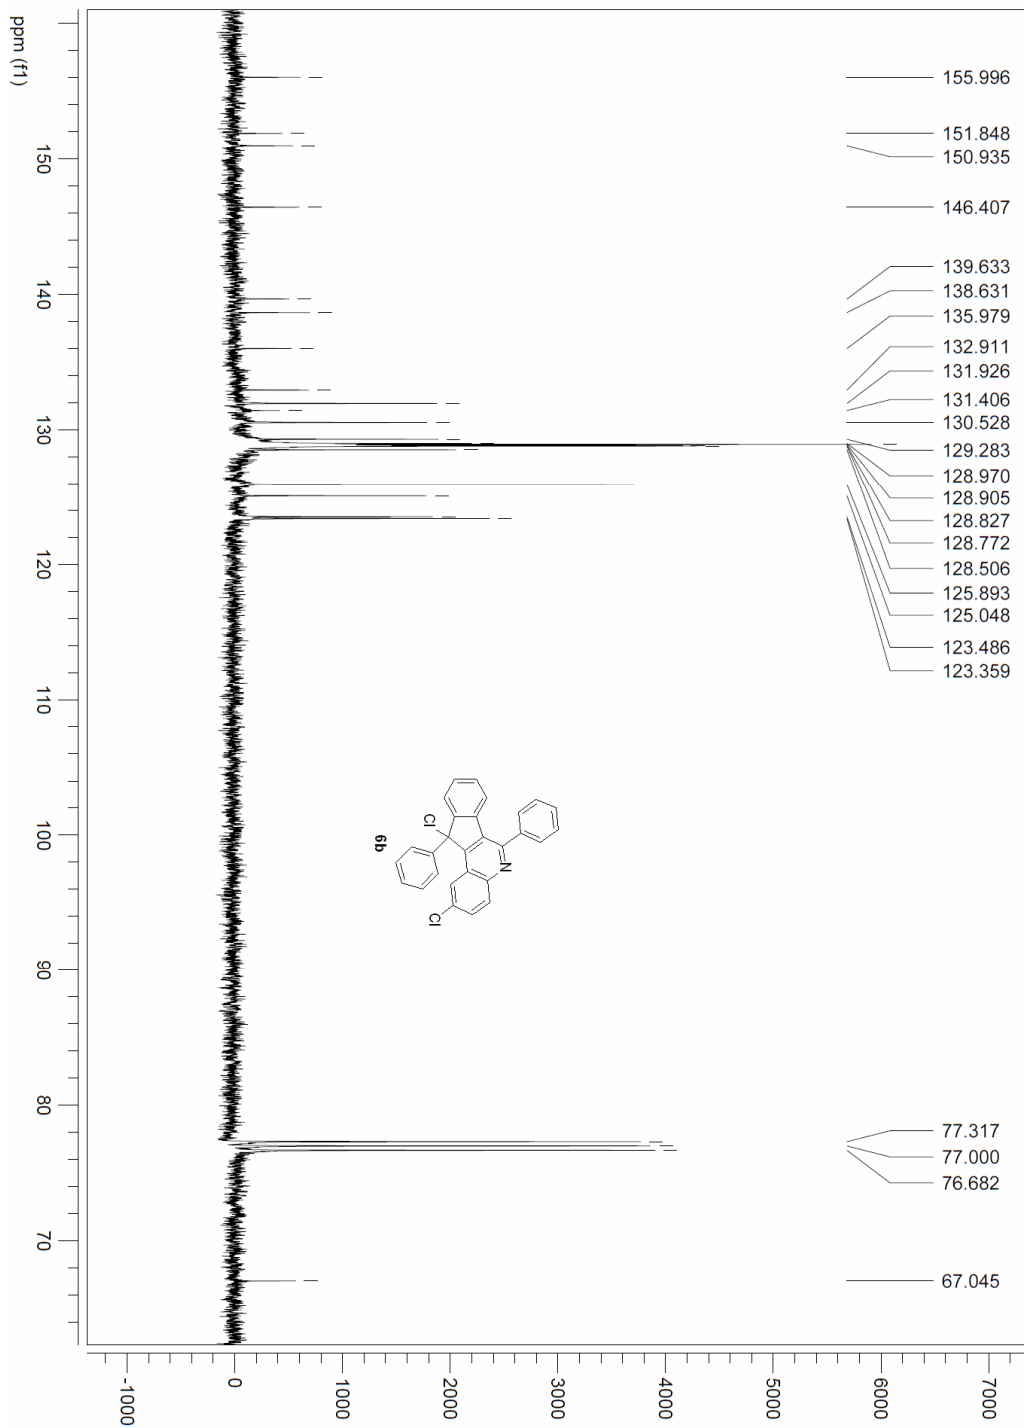

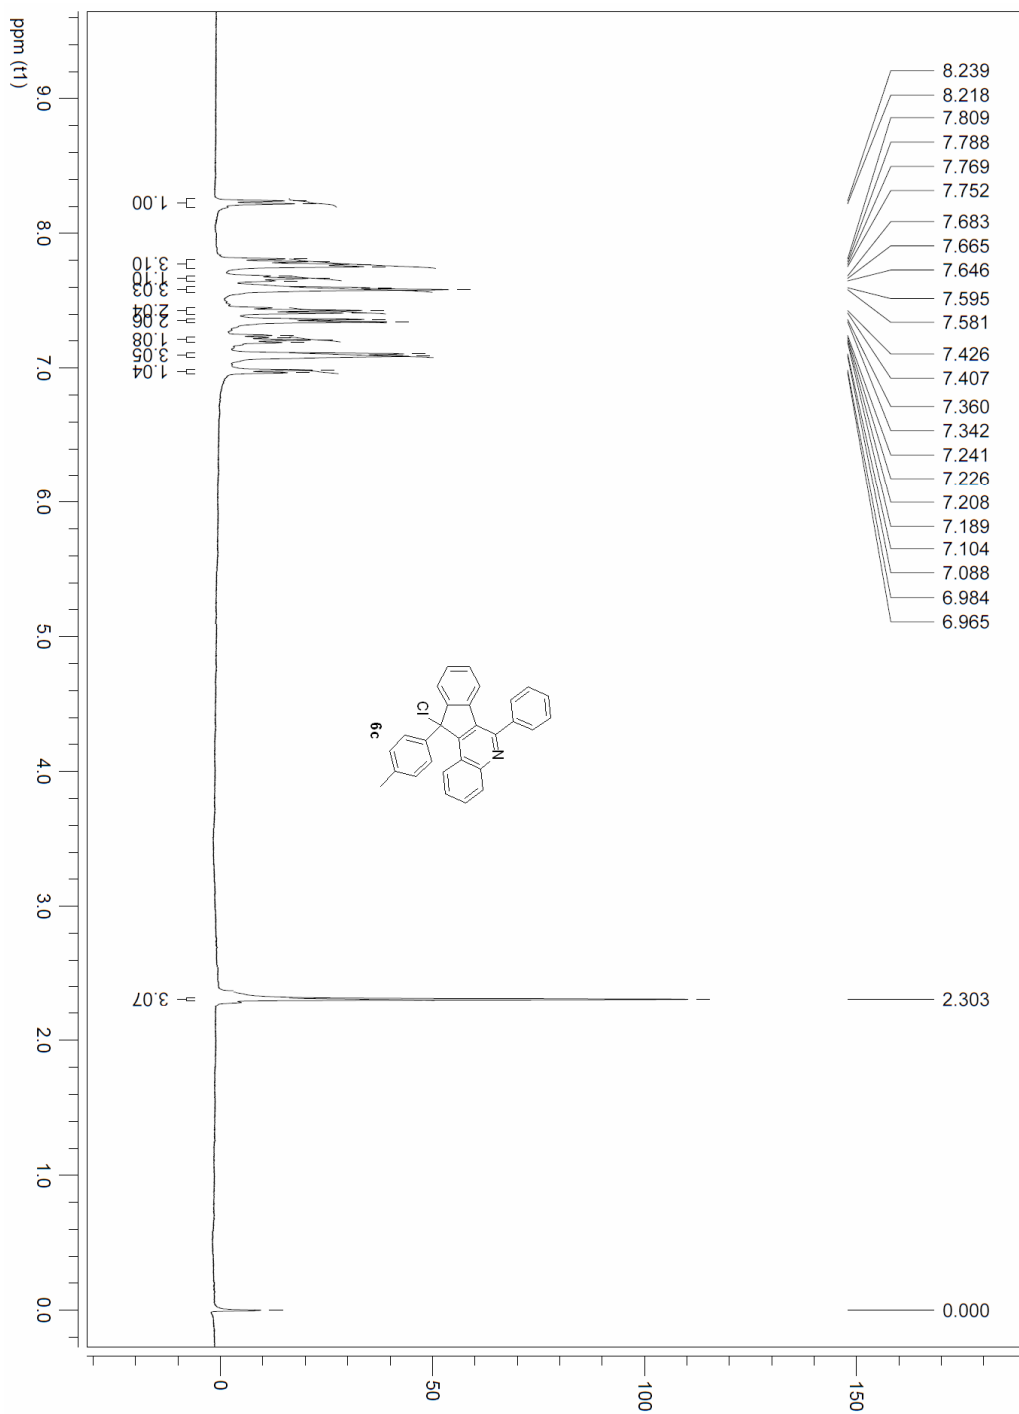

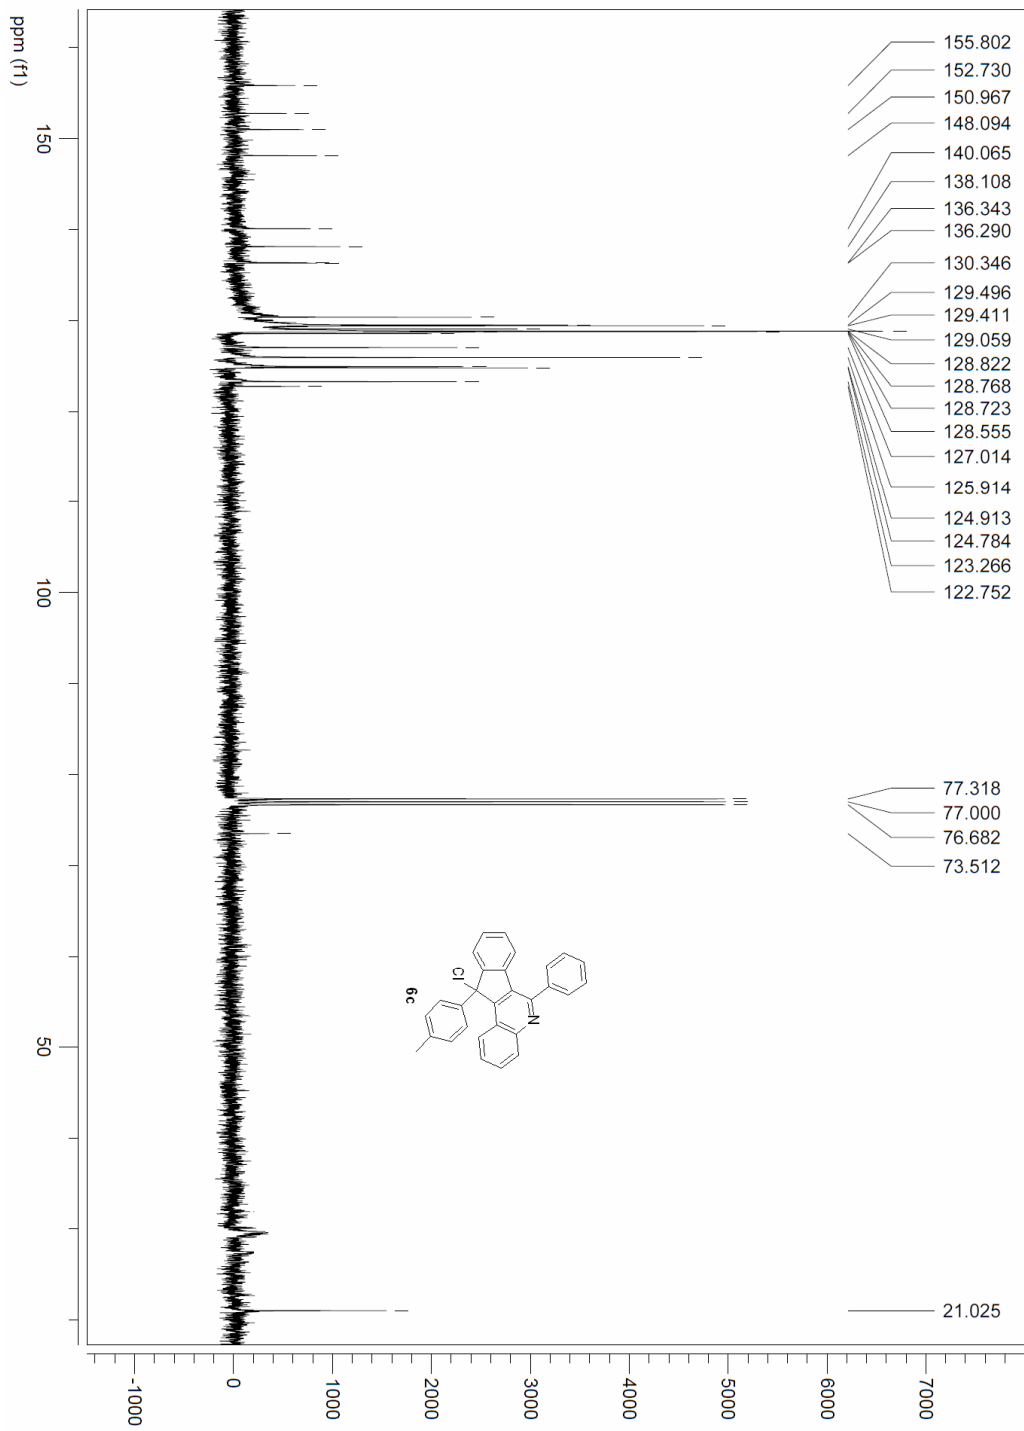



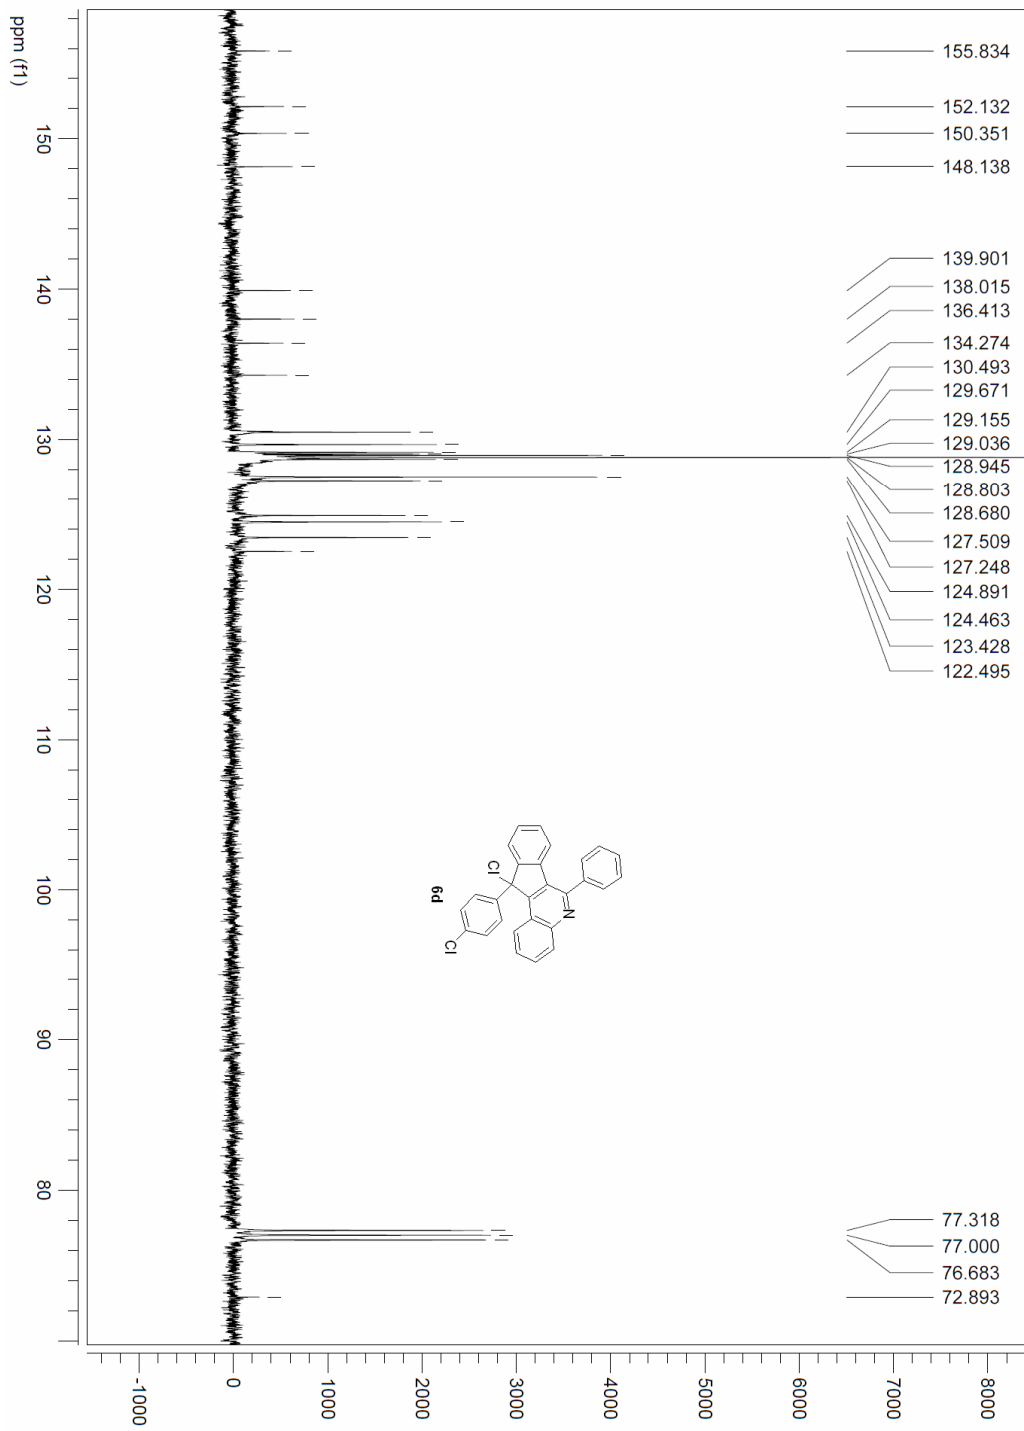





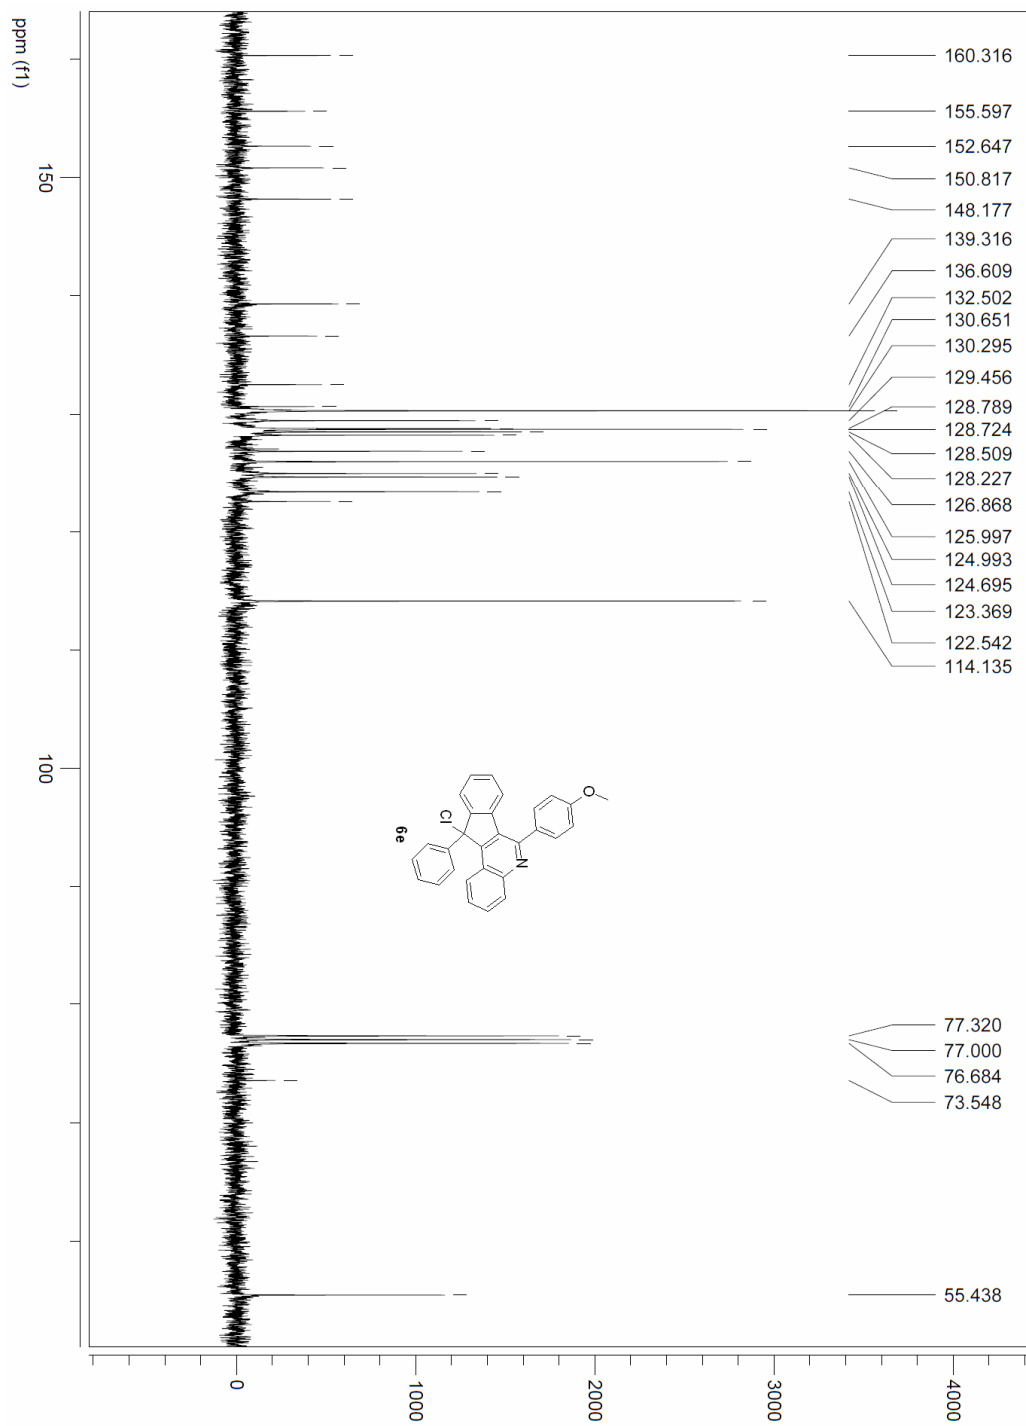

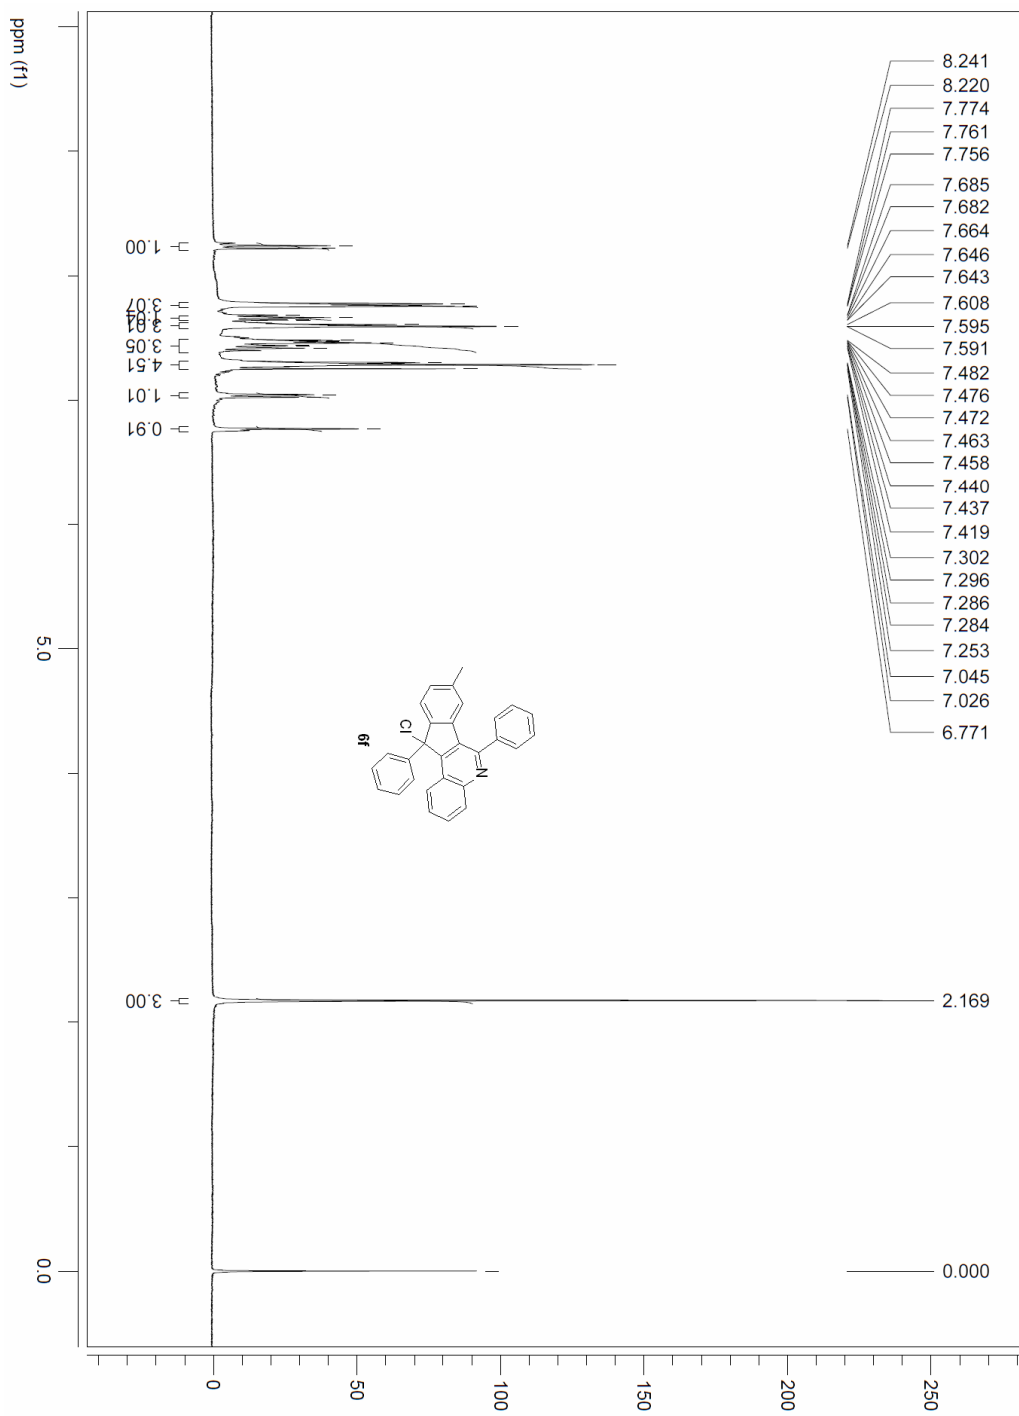

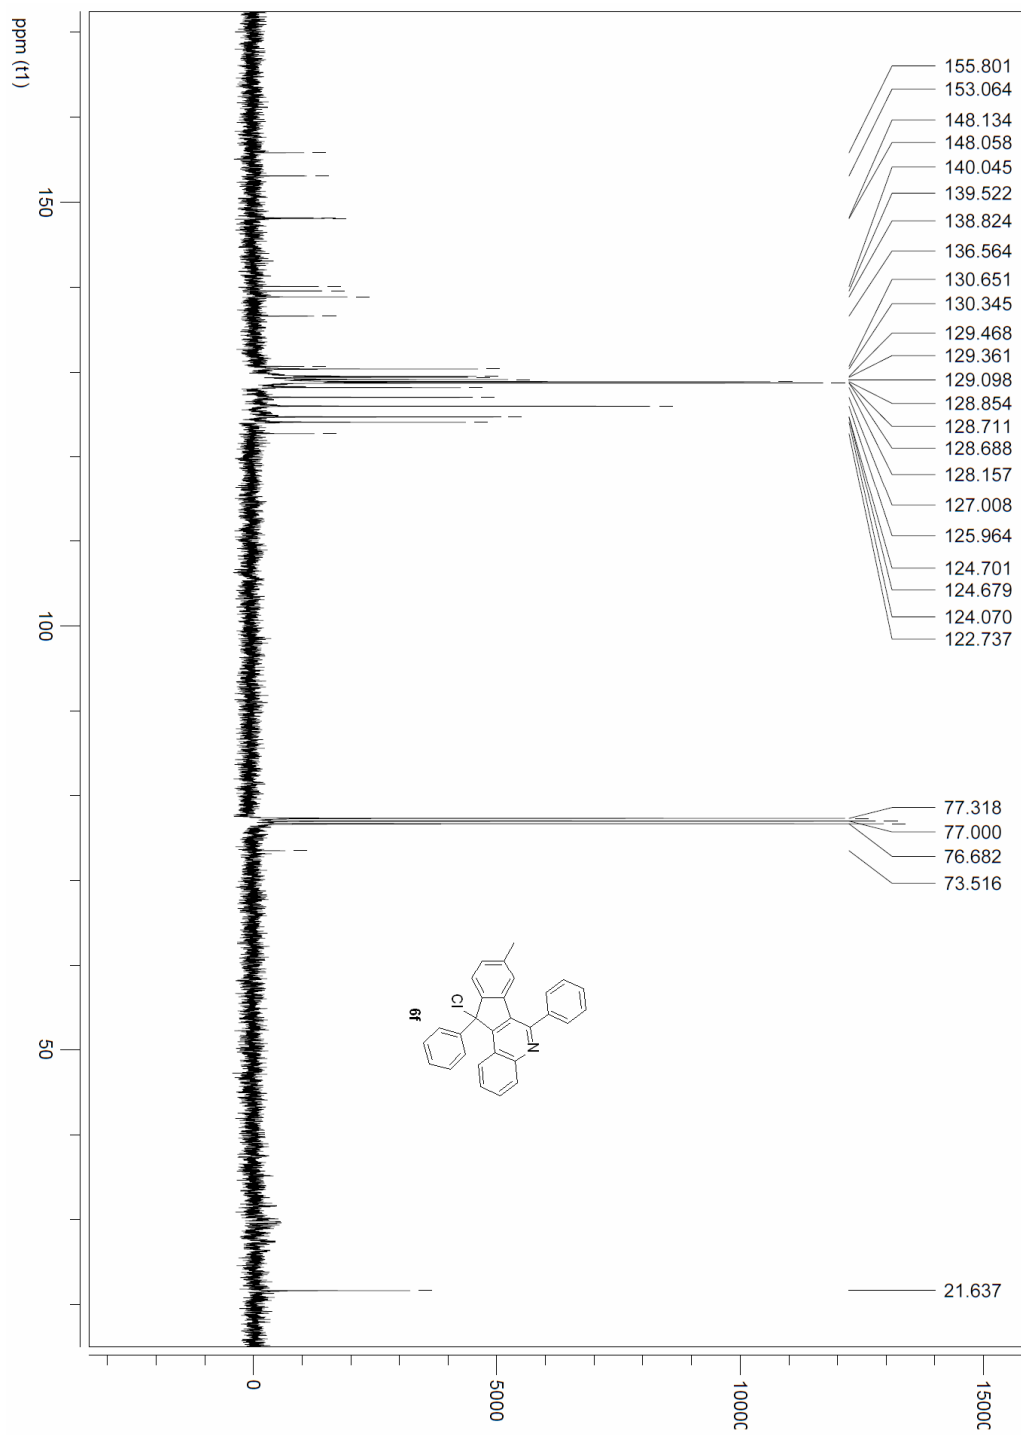

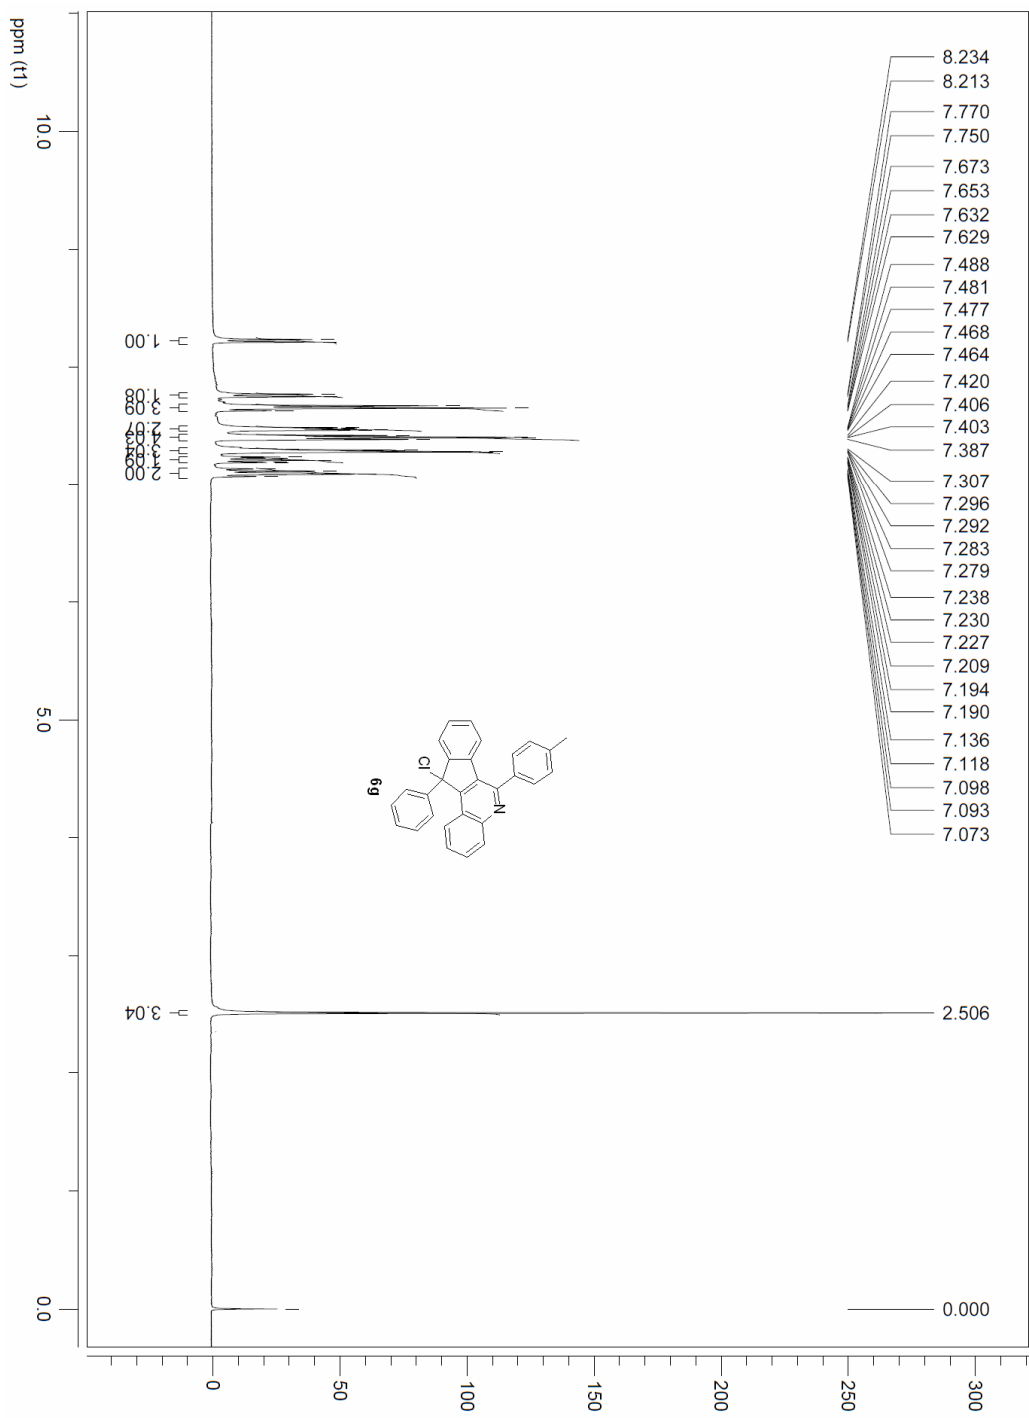

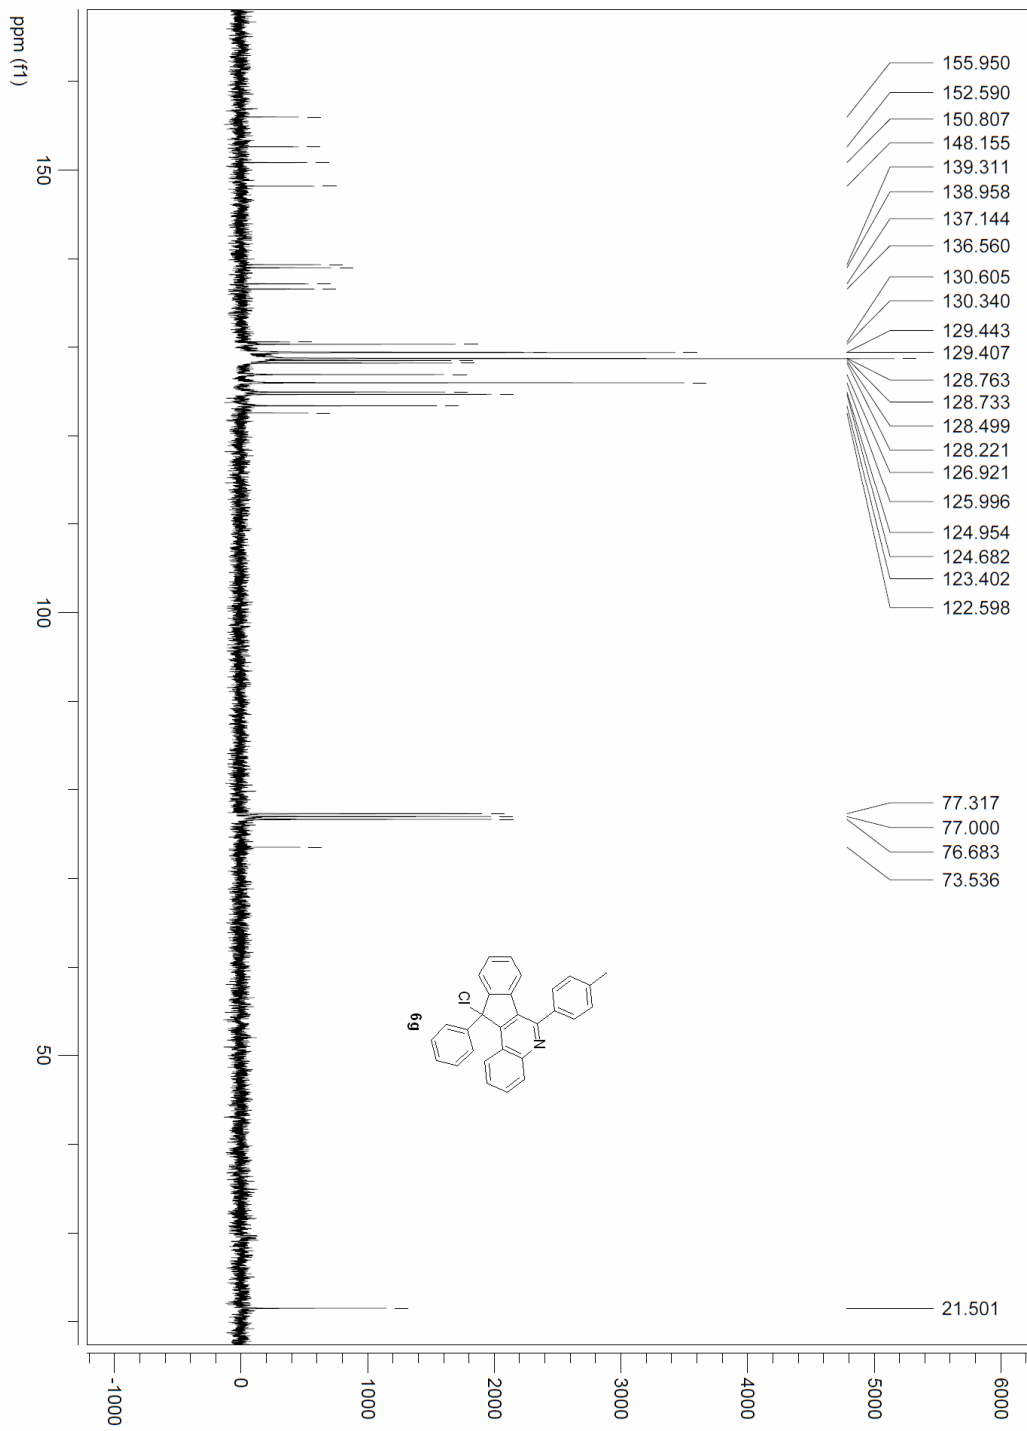

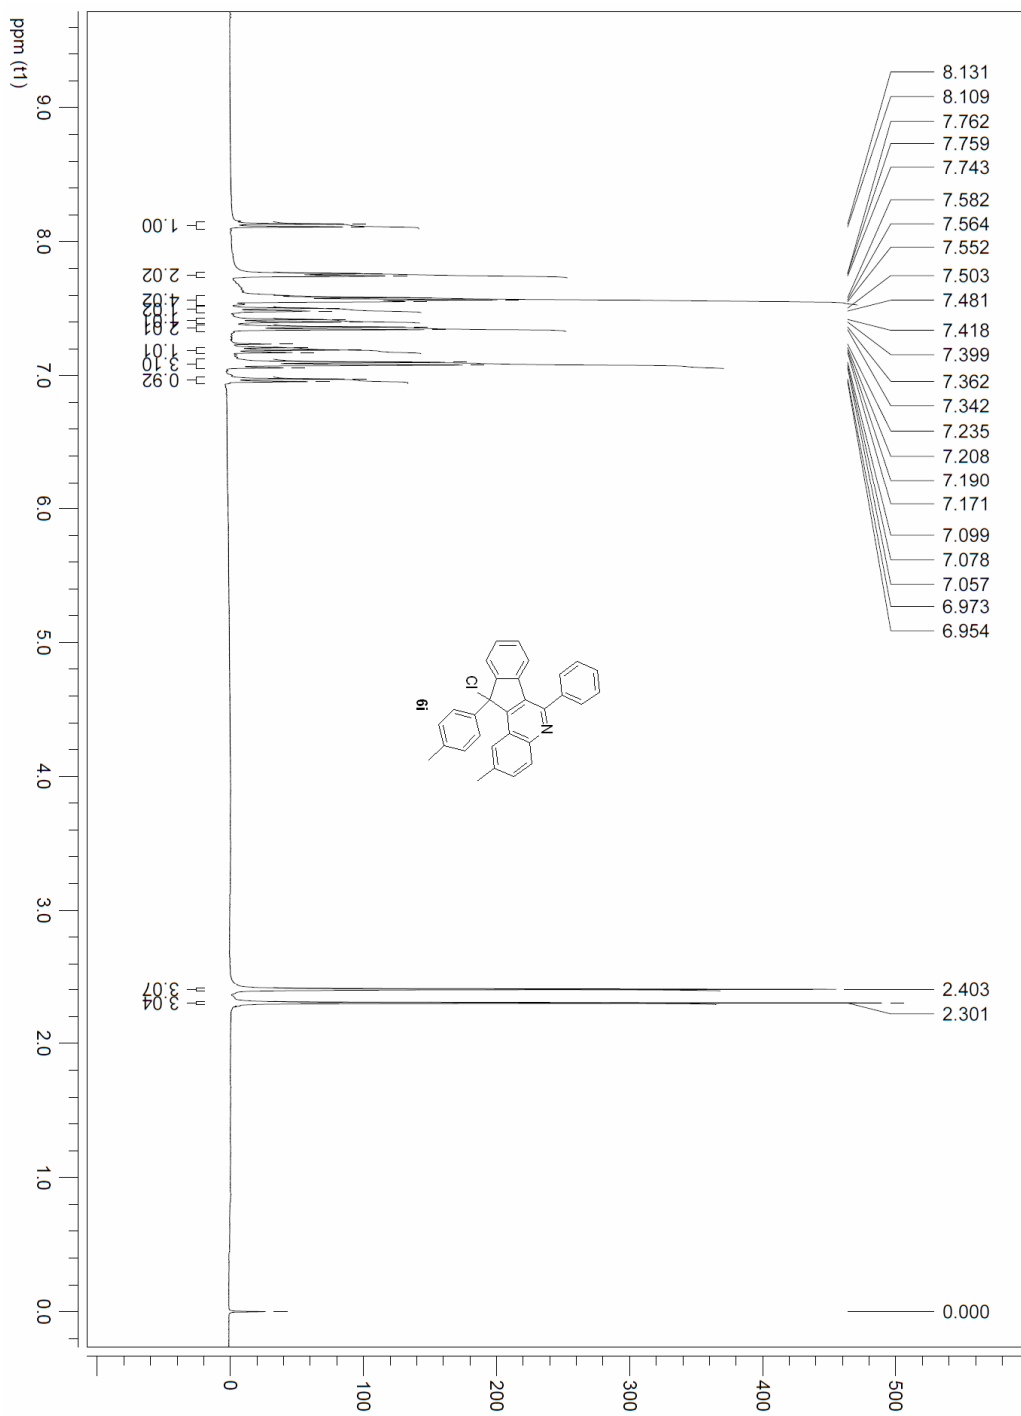

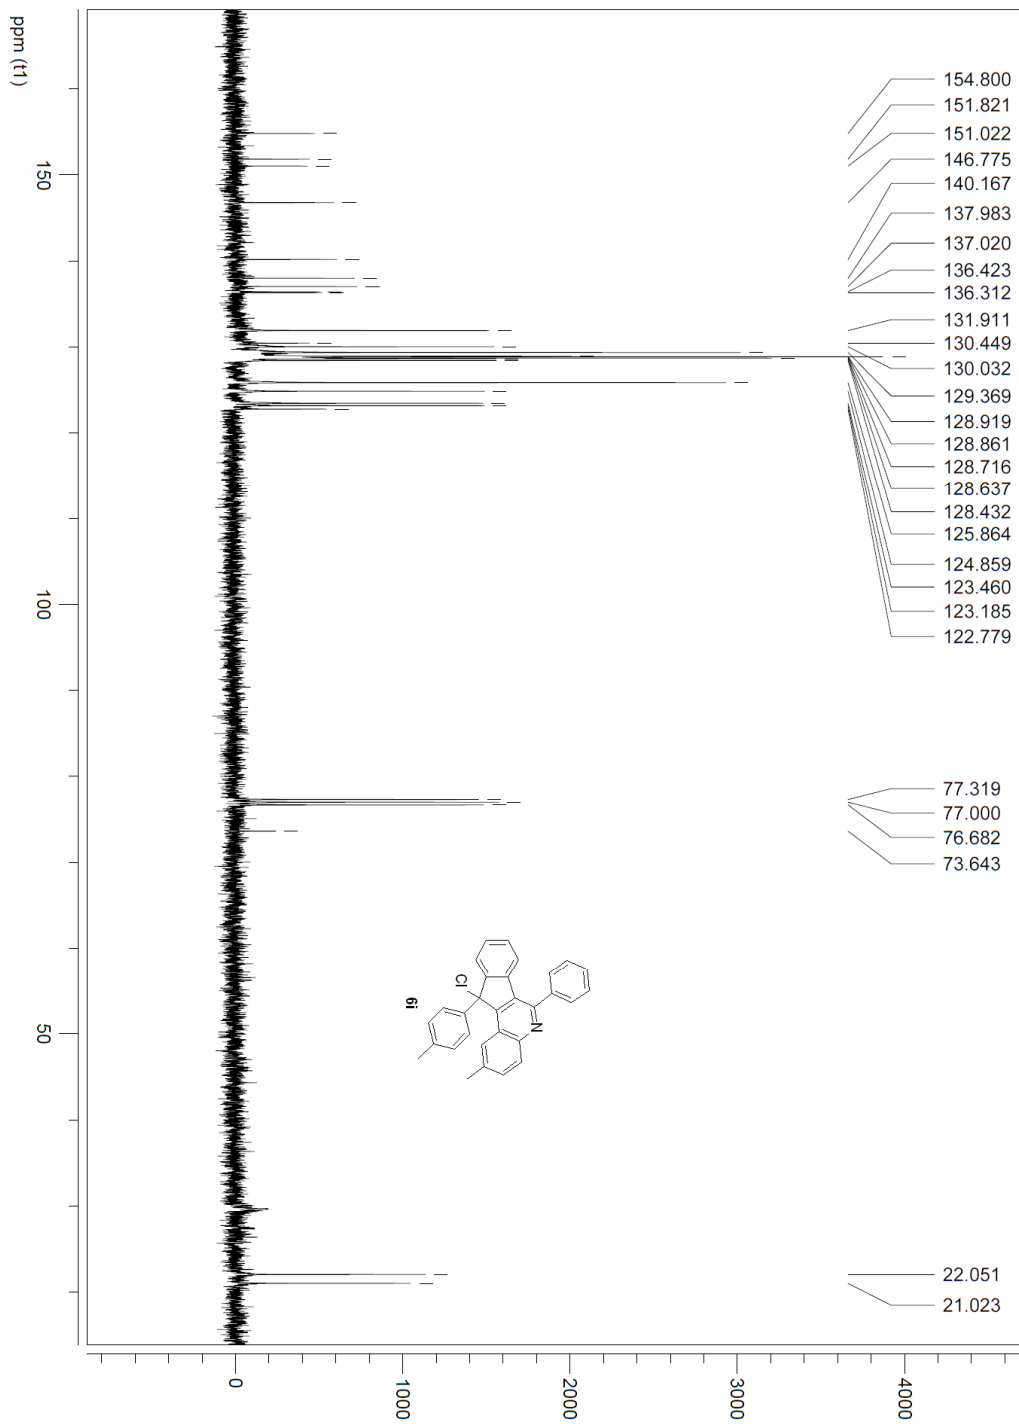



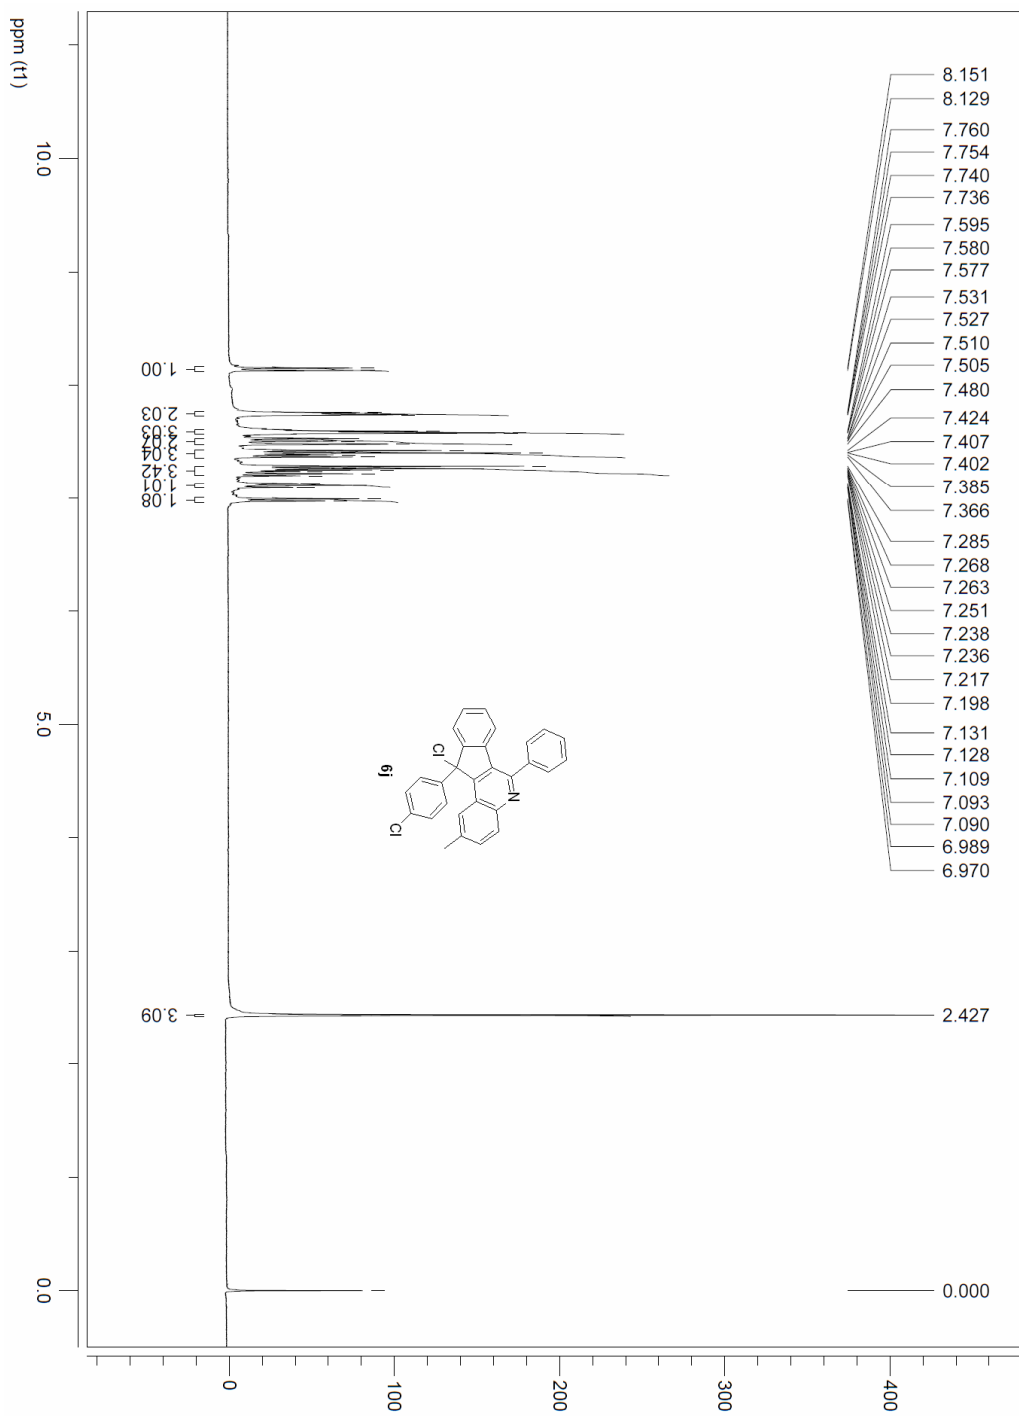

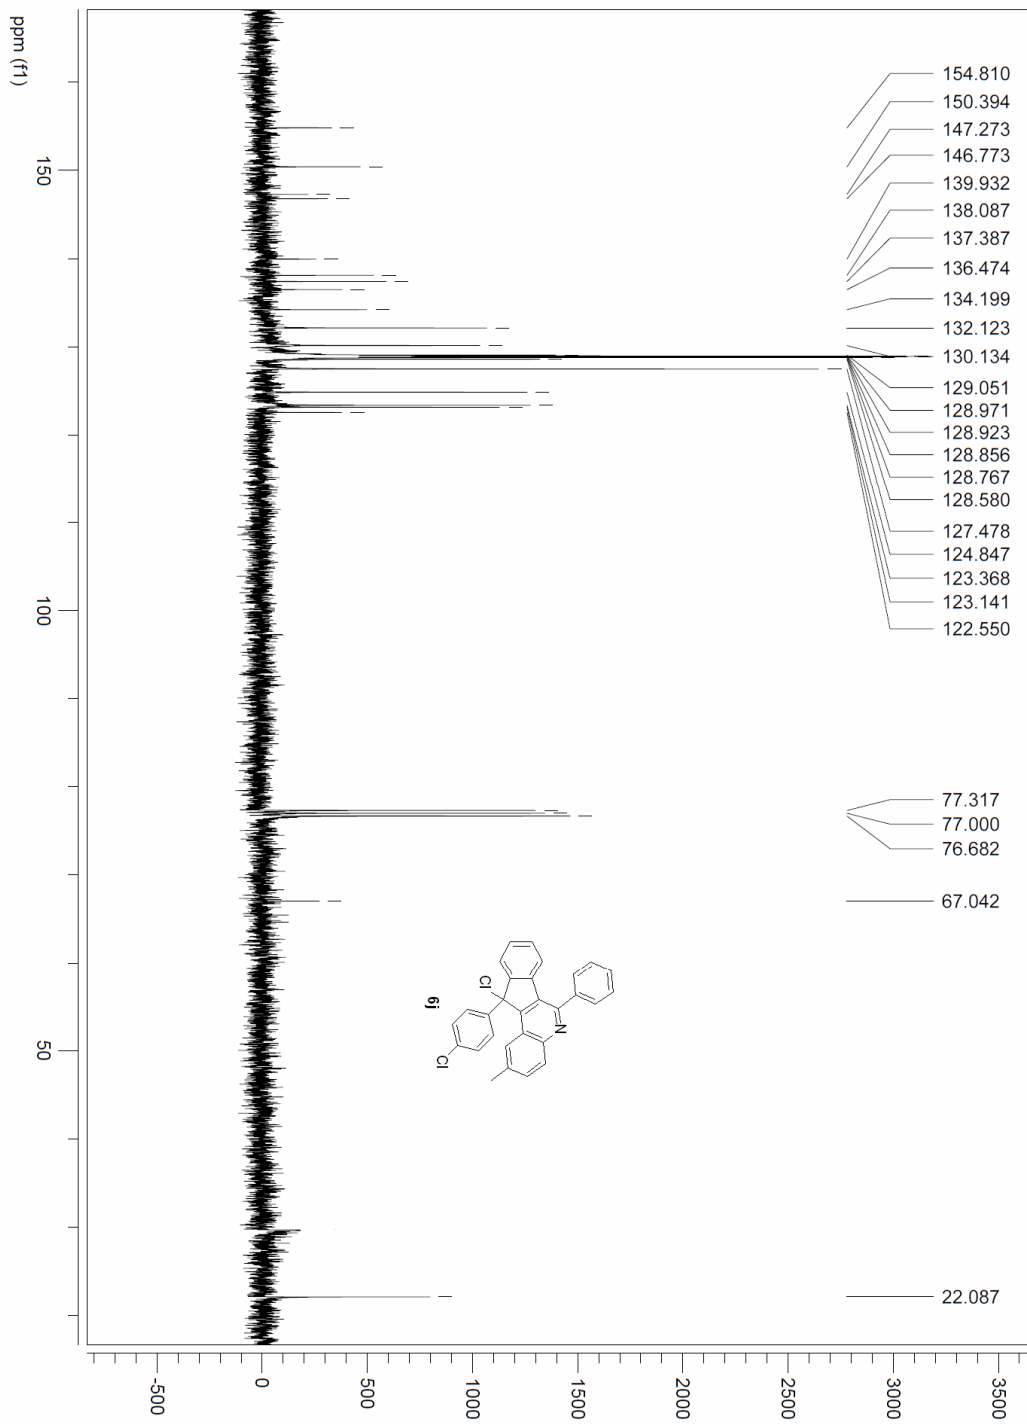



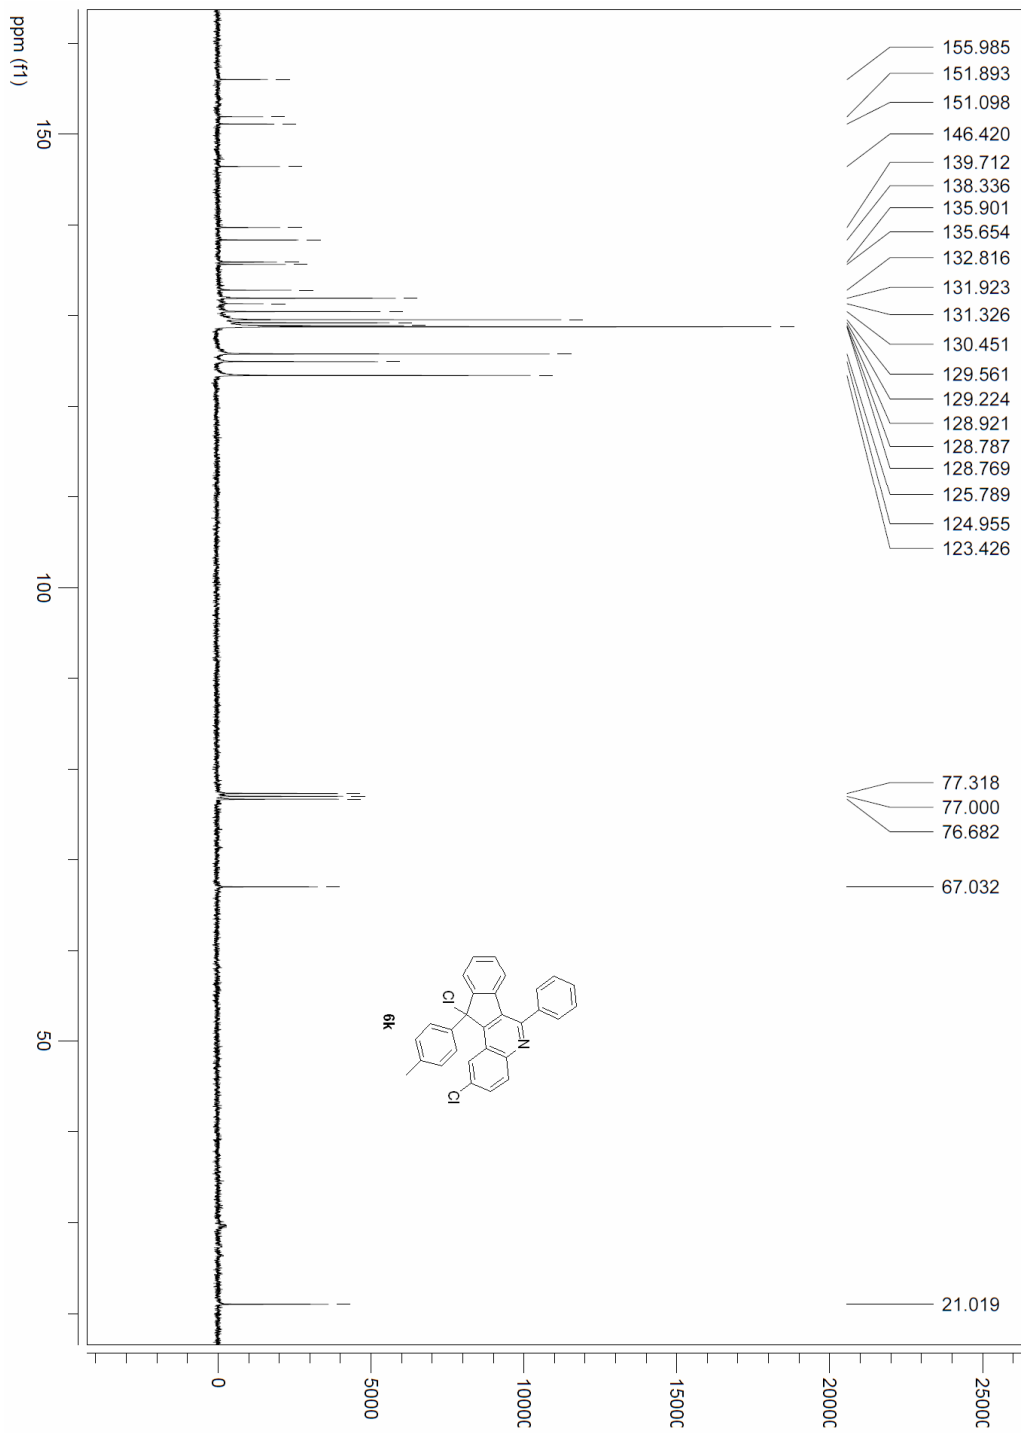

Supplement: c2ob06764a.pdf [file c2ob06764a.pdf]
